# Supplementary material for: Copper-catalysed C–H functionalisation gives access to 2-aminobenzimidazoles
Source: Royal Society of Chemistry journal article supplement (doi:10.1039/c9ob01651a), 2019-01-01
Supplement: c9ob01651a1.pdf [file c9ob01651a1.pdf]

## Supporting information

# Copper-Catalysed C–H Functionalisation gives access to 2-aminobenzimidazoles

Peter. R. Clark\*, Glynn. D. Williams, Nicholas. C. O. Tomkinson

Email: peter.r.clark@gsk.com

Email: glynn.d.williams@gsk.com

Email: nicholas.tomkinson@strath.ac.uk

### Contents

Pages 2 – 3: Analytical methods

Pages 4 – 7: Experimental and analytical data for guanidine starting materials

Pages 8 – 13: Screening & optimisation procedure

Page 13: Internal standard calibrations

Page 14: Kinetic isotope effect

Pages 15 – 16: Reaction additive screening

Pages 17 – 21: <sup>1</sup>H NMR spectra of known compounds

Pages 22 – 53: NMR spectra of unknown compounds

Pages 54 – 57: <sup>1</sup>H, <sup>13</sup>C & 2D NMRs of compound **6** for structural elucidation

#### HPLC solvent gradient for reaction monitoring

The solvents utilised were:

A: Water + 0.05% v/v trifluoroacetic acid

B: Acetonitrile + 0.05% v/v trifluoroacetic acid

The gradient employed was:

| <b>Time</b><br><b>(min)</b> | <b>Flow Rate</b><br><b>(mL min<sup>-1</sup>)</b> | <b>%A</b> | <b>%B</b> |
|-----------------------------|--------------------------------------------------|-----------|-----------|
| 0.00                        | 1                                                | 97        | 3         |
| 3.7                         | 1                                                | 5         | 95        |
| 4.0                         | 1                                                | 5         | 95        |
| 4.1                         | 1                                                | 97        | 3         |
| 5.5                         | 1                                                | 97        | 3         |

#### LCMS High pH solvent gradient for reaction monitoring

The solvents employed were:

A = 10 mM ammonium bicarbonate in water adjusted to pH 10 with ammonia solution.

B = Acetonitrile.

The gradient employed was:

| <b>Time</b><br><b>(min)</b> | <b>Flow Rate</b><br><b>(mL min<sup>-1</sup>)</b> | <b>%A</b> | <b>%B</b> |
|-----------------------------|--------------------------------------------------|-----------|-----------|
| 0.00                        | 1                                                | 97        | 3         |
| 0.05                        | 1                                                | 97        | 3         |
| 1.50                        | 1                                                | 5         | 95        |
| 1.90                        | 1                                                | 5         | 95        |
| 2.00                        | 1                                                | 97        | 3         |

### High Resolution Mass Spectrometry solvent gradient (HRMS)

| <b>Time<br/>(min)</b> | <b>%A</b> | <b>%B</b> |
|-----------------------|-----------|-----------|
| 0.00                  | 95        | 5         |
| 0.05                  | 95        | 5         |
| 6.00                  | 0         | 100       |
| 8.50                  | 0         | 100       |
| 9.50                  | 95        | 5         |
| 12.00                 | 95        | 5         |

#### 2-(3-Methoxyphenyl)-1,1-dimethylguanidine (4)

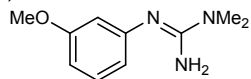

Using general procedure 1 with 3-methoxyaniline (6.61 g, 53.7 mmol, 1 equiv), sodium hydride (2.53 g, 63.4 mmol, 1.2 equiv) and dimethylcyanamide (4.44 g, 63.4 mmol, 1.2 equiv). 2-(3-methoxyphenyl)-1,1-dimethylguanidine (**4**) (5.42 g, 28.0 mmol, 52%) was isolated as a pale-orange crystalline solid after 3.5 hours by crystallisation from heptane/ethyl acetate and rinsing with cold tBME (10 mL).

Melting point: 134–136 °C. FTIR  $\nu_{\max}/\text{cm}^{-1}$  3409, 3131 (br), 1653, 1544, 1485, 1396.  $^1\text{H}$  NMR (400 MHz, *METHANOL-d*<sub>4</sub>)  $\delta$  ppm 2.99 (6 H, s), 3.78 (3 H, s), 6.48 – 6.50 (1 H, m), 6.52 (1 H, dd,  $J=2.2, 0.9$  Hz), 6.59 (1 H, ddd,  $J=8.1, 2.2, 0.9$  Hz), 7.19 (1 H, app. t,  $J=8.1$  Hz)  $^{13}\text{C}\{^1\text{H}\}$  NMR (101 MHz, *METHANOL-d*<sub>4</sub>)  $\delta$  ppm 38.1 55.6, 109.0, 110.9, 117.6, 130.9, 152.6, 157.1, 162.2 HRMS (ESI Orbitrap)  $m/z$ :  $[\text{M} + \text{H}]^+$  Calcd for  $\text{C}_{10}\text{H}_{16}\text{N}_3\text{O}$  194.1288, found  $[\text{M} + \text{H}]^+$  194.1280.

#### 1,1-Dimethyl-2-(3-(trifluoromethyl)phenyl)guanidine (7).

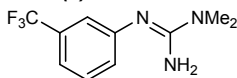

Using general procedure 1 with 3-(trifluoromethyl)aniline (3.00 g, 31.0 mmol, 1 equiv), sodium hydride (1.49 g, 37.2 mmol, 1.2 equiv) and dimethylcyanamide (2.61 g, 37.2 mmol, 1.2 equiv), after a 45 minute reaction time, a precipitate formed on addition of water, which was filtered, the liquors extracted and combined with the filtered solid, yielding 1,1-dimethyl-2-(3-(trifluoromethyl)phenyl) guanidine (**7**) (4.658 g, 20.2 mmol, 65 %) as an off-white crystalline solid after crystallisation from boiling heptane and rinsing with cold tBME (5 mL).

Melting point: 102–104 °C FTIR  $\nu_{\max}/\text{cm}^{-1}$  3450, 3122 (br), 1637, 1566, 1334.  $^1\text{H}$  NMR (400 MHz, *METHANOL-d*<sub>4</sub>)  $\delta$  ppm 2.98 (6 H, s), 7.09 – 7.14 (2 H, m), 7.18 – 7.22 (1 H, m) 7.40 (1 H, app. t,  $J=7.9$  Hz)  $^{13}\text{C}\{^1\text{H}\}$  NMR (101 MHz, *METHANOL-d*<sub>4</sub>)  $\delta$  ppm 38.0, 119.1 (q,  $J=3.8$  Hz), 121.7 (q,  $J=3.8$  Hz), 125.9 (q,  $J=271.4$  Hz), 128.8, 131.0, 132.6 (q,  $J=31.7$  Hz), 152.8, 157.3.  $^{19}\text{F}$  NMR (377 MHz, *METHANOL-d*<sub>4</sub>)  $\delta$  ppm -64.14 (1 F, s) HRMS (ESI Orbitrap)  $m/z$ :  $[\text{M} + \text{H}]^+$  Calcd for  $\text{C}_{10}\text{H}_{13}\text{F}_3\text{N}_3$   $[\text{M} + \text{H}]^+$  232.1056, found  $[\text{M} + \text{H}]^+$  232.1047

#### 1,1-Dimethyl-2-phenylguanidine (27).

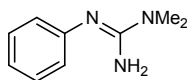

Using general procedure 1 with aniline (1.00 g, 10.7 mmol, 1 equiv), sodium hydride (0.52 g, 12.9 mmol, 1.2 equiv) and dimethylcyanamide (0.90 g, 12.9 mmol, 1.20 equiv) was reacted for 5 hours before addition of a further portion of dimethylcyanamide (0.26 g, 3.7 mmol, 0.35 equiv) and the reaction stirred at room temperature overnight. After the standard work up, the product was purified by chromatography (Biotage KP-NH silica, EtOAc) and the fractions containing product were recrystallised from EtOAc to yield 1,1-dimethyl-2-phenylguanidine (**27**) as a white crystalline solid (943 mg, 5.8 mmol, 54%)

Melting point: 91–93 °C FTIR  $\nu_{\max}/\text{cm}^{-1}$  3429, 3144 (br), 1635, 1561, 1484.  $^1\text{H}$  NMR (400 MHz, *METHANOL-d*<sub>4</sub>)  $\delta$  ppm 2.99 (6 H, s), 6.90 – 6.94 (2 H, m), 7.00 (1 H, dt,  $J=14.8, 1.2$  Hz), 7.26 – 7.32 (2 H, m),  $^{13}\text{C}\{^1\text{H}\}$  NMR (101 MHz, *METHANOL-d*<sub>4</sub>)  $\delta$  ppm 38.1, 123.3, 125.3, 130.3, 151.3, 157.1. HRMS (ESI Orbitrap)  $m/z$ :  $[\text{M} + \text{H}]^+$  Calcd for  $\text{C}_9\text{H}_{14}\text{N}_3$   $[\text{M} + \text{H}]^+$  164.1188, found  $[\text{M} + \text{H}]^+$  164.1183 *The data is in agreement with those previously reported*<sup>1</sup>

#### 1-Dimethyl-2-phenyl(D<sub>5</sub>)guanidine (28).

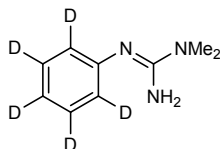

Using general procedure 1 with aniline-D<sub>5</sub> (1.09 g, 11.1 mmol, 1 equiv), sodium hydride (0.51 g, 12.7 mmol, 1.15 equiv) and dimethylcyanamide (0.91 g, 13.0 mmol, 1.2 equiv) was reacted for 5 hours before addition of a further portion of dimethylcyanamide (0.17 g, 0.22 equiv) and the reaction stirred at room temperature overnight. After the standard work up, the product was purified by chromatography (Biotage KP-NH silica, EtOAc) and the fractions containing product were recrystallised from EtOAc to yield 1,1-dimethyl-2-(phenyl-D<sub>5</sub>)guanidine (**28**) as a white crystalline solid (461 mg, 2.7 mmol, 25%)

$^1\text{H}$  NMR (400 MHz, *METHANOL-d*<sub>4</sub>)  $\delta$  ppm 2.96 (6 H, s),  $^{13}\text{C}\{^1\text{H}\}$  NMR (101 MHz, *METHANOL-d*<sub>4</sub>)  $\delta$  ppm 38.1, 122.8 (t,  $J=23.8$  Hz), 124.9 (t,  $J=24.0$  Hz), 129.8 (t,  $J=25.0$  Hz), 151.1, 157.1.  $^2\text{H}$  NMR (92 MHz, *DMSO-d*<sub>6</sub>)  $\delta$  ppm 7.4 (2 D, s), 7.1 (1 D, s), 7.1 (2 D, s)

### 2-(2-Fluorophenyl)-1,1-dimethylguanidine (51).

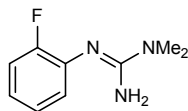

Using general procedure 1 with 2-fluoroaniline (2.00 g, 18.0 mmol, 1 equiv), sodium hydride (0.87 g, 21.9 mmol, 1.21 equiv) and dimethylcyanamide (1.51 g, 21.6 mmol, 1.2 equiv), 2-(2-fluorophenyl)-1,1-dimethylguanidine (**51**) (2.02 g, 11.2 mmol, 62 %) was isolated as an off-white solid after 15 hours by column chromatography (5% MeOH / CH<sub>2</sub>Cl<sub>2</sub> with 2% triethylamine in the CH<sub>2</sub>Cl<sub>2</sub> portion).

Melting point: 86–88 °C FTIR  $\nu_{\max}/\text{cm}^{-1}$  3458, 3134 (br), 1636, 1566, 1481. <sup>1</sup>H NMR (400 MHz, METHANOL-*d*<sub>4</sub>)  $\delta$  ppm 3.02 (6 H, s), 6.95 – 7.03 (2 H, m), 7.03 – 7.11 (2 H, m). <sup>13</sup>C{<sup>1</sup>H} NMR (101 MHz, METHANOL-*d*<sub>4</sub>)  $\delta$  ppm 38.1, 116.9 (d, *J*=20.8 Hz), 124.4 (d, *J*=7.4 Hz), 125.7 (d, *J*=3.6 Hz), 128.1 (d, *J*=2.5 Hz), 139.0 (d, *J*=12.8 Hz), 157.6 (d, *J*=242.4 Hz), 157.4. <sup>19</sup>F NMR (377 MHz, METHANOL-*d*<sub>4</sub>)  $\delta$  ppm -126.93 (s) HRMS (ESI Orbitrap) *m/z*: [M + H]<sup>+</sup> Calcd for C<sub>9</sub>H<sub>13</sub>FN<sub>3</sub> [M + H]<sup>+</sup> 182.1088, found [M + H]<sup>+</sup> 182.1079

### Ethyl 4-((amino(dimethylamino)methylene)amino) benzoate (52)

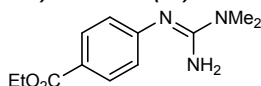

Using general procedure 1 with ethyl 4-aminobenzoate (1.00 g, 6.1 mmol, 1 equiv), sodium hydride (0.32 g, 8.0 mmol, 1.3 equiv) and dimethylcyanamide (0.51 g, 7.3 mmol, 1.2 equiv), after 2 hours, ethyl 4-((amino(dimethylamino)methylene)amino)benzoate (**52**) was isolated as a white solid by chromatography (Biotage KP-NH silica 0–10% MeOH/CH<sub>2</sub>Cl<sub>2</sub>) (136 mg, 0.6 mmol, 10%)

Melting point: 89–92 °C FTIR  $\nu_{\max}/\text{cm}^{-1}$  3455, 3124 (br), 1703, 1624, 1551, 1493, 1401. <sup>1</sup>H NMR (400 MHz, METHANOL-*d*<sub>4</sub>)  $\delta$  ppm 1.39 (3 H, t, *J*=7.1 Hz), 3.01 (6 H, s), 4.33 (2 H, q, *J*=7.1 Hz), 6.93 – 7.01 (2 H, m), 7.87 – 7.96 (2 H, m). <sup>13</sup>C{<sup>1</sup>H} NMR (101 MHz, METHANOL-*d*<sub>4</sub>)  $\delta$  ppm 14.8, 38.1, 61.7, 124.0, 124.3, 132.1, 157.1, 157.4, 168.5. HRMS (ESI Orbitrap) *m/z*: [M + H]<sup>+</sup> Calcd for C<sub>12</sub>H<sub>18</sub>N<sub>3</sub>O<sub>2</sub> [M + H]<sup>+</sup> 236.1394, found [M + H]<sup>+</sup> 236.1384

### 2-(4-Cyanophenyl)-1,1-dimethylguanidine (53).

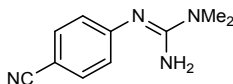

Using general procedure 1 with 4-aminobenzonitrile (3.00 g, 25.4 mmol, 1 equiv), sodium hydride (1.32 g, 33.0 mmol, 1.3 equiv) and dimethylcyanamide (2.14 g, 30.5 mmol, 1.2 equiv), after 16 hours 2-(4-cyanophenyl)-1,1-dimethylguanidine (**53**) was isolated as a white crystalline solid after recrystallisation from EtOAc (1.412 g, 7.5 mmol, 30%).

Melting point: 125–127 °C FTIR  $\nu_{\max}/\text{cm}^{-1}$  3482, 3370, 2216, 1631, 1514, 1404. <sup>1</sup>H NMR (400 MHz, METHANOL-*d*<sub>4</sub>)  $\delta$  ppm 3.02 (6 H, s), 6.98 – 7.04 (2 H, m), 7.53 – 7.60 (2 H, m). <sup>13</sup>C{<sup>1</sup>H} NMR (101 MHz, METHANOL-*d*<sub>4</sub>)  $\delta$  ppm 38.0, 103.9, 121.0, 125.3, 134.4, 157.4, 157.6.

HRMS (ESI Orbitrap) *m/z*: [M + H]<sup>+</sup> Calcd for C<sub>10</sub>H<sub>13</sub>N<sub>3</sub> [M + H]<sup>+</sup> 189.1135, found [M + H]<sup>+</sup> 189.1136

### Tert-butyl 3-((amino(dimethylamino)methylene)amino)benzoate (54).

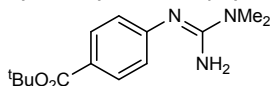

Using general procedure 1 with *tert*-butyl 4-aminobenzoate (2.52 g, 13.1 mmol, 1 equiv), sodium hydride (0.77 g, 19.3 mmol, 1.5 equiv) and dimethylcyanamide (1.13 g, 16.1 mmol, 1.2 equiv), after 16 hours and the standard work-up, the resultant crude solid was washed with heptane (15 mL) and recrystallised from heptane/EtOAc to afford *tert*-butyl 3-((amino(dimethylamino)methylene)amino)benzoate (**54**) as a white crystalline solid (2.61 g, 9.9 mmol 76%)

Melting point: 104–107 °C FTIR  $\nu_{\max}/\text{cm}^{-1}$  3446, 2982 (br), 1701, 1563, 1368, 1289. <sup>1</sup>H NMR (400 MHz, METHANOL-*d*<sub>4</sub>)  $\delta$  ppm 1.60 (9 H, s), 3.01 (6 H, s), 6.95 (2 H, d, *J*=8.4 Hz), 7.86 (2 H, d, *J*=8.4 Hz). <sup>13</sup>C{<sup>1</sup>H} NMR (101 MHz, METHANOL-*d*<sub>4</sub>)  $\delta$  ppm 27.1, 36.6, 80.2, 123.0, 124.4, 130.4, 155.2, 155.7, 166.5. HRMS (ESI Orbitrap) *m/z*: [M + H]<sup>+</sup> Calcd for C<sub>13</sub>H<sub>22</sub>N<sub>3</sub>O<sub>2</sub> [M + H]<sup>+</sup> 264.1707, found [M + H]<sup>+</sup> 264.2698

### 2-(4-Bromophenyl)-1,1-dimethylguanidine (55).

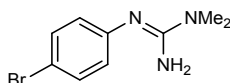

Using general procedure 1 with 4-bromoaniline (4.00 g, 23.3 mmol, 1 equiv), sodium hydride (1.21 g, 30.3 mmol, 1.3 equiv) and dimethylcyanamide (1.91 g, 27.2 mmol, 1.2 equiv), after 16 hours, following the standard work-up the resultant yellow solid was purified by recrystallisation from hot EtOAc and washing the resultant crystals with cold heptane to yield 2-(4-bromophenyl)-1,1-dimethylguanidine (**55**) as a yellow crystalline solid (2.19 g, 9.1 mmol, 39%)

Melting point: 92–94 °C FTIR  $\nu_{\max}/\text{cm}^{-1}$  3540, 3190 (br), 1693, 1633, 1593, 1556. <sup>1</sup>H NMR (400 MHz, METHANOL-*d*<sub>4</sub>)  $\delta$  ppm 2.99 (6 H, s), 6.81 – 6.85 (2 H, m), 7.37 – 7.42 (2 H, m). <sup>13</sup>C{<sup>1</sup>H} NMR (101 MHz, METHANOL-*d*<sub>4</sub>)  $\delta$  ppm 38.0, 115.5, 127.1, 133.2, 151.0, 157.1. HRMS (ESI Orbitrap) *m/z*: [M + H]<sup>+</sup> Calcd for C<sub>9</sub>H<sub>13</sub><sup>79</sup>BrN<sub>3</sub> [M + H]<sup>+</sup> 242.0297, found [M + H]<sup>+</sup> 242.0280

### 3-(3-Chlorophenyl)-1,1-dimethylguanidine (56).

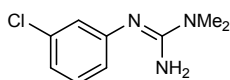

Using general procedure 1 with 3-chloroaniline (1.51 g, 11.8 mmol, 1 equiv), sodium hydride (0.58 g, 14.5 mmol, 1.2 equiv) and dimethylcyanamide (1.00 g, 14.2 mmol, 1.2 equiv), after 2.5 hours, 3-(3-chlorophenyl)-1,1-dimethylguanidine (**56**) was isolated as a white solid after chromatography (0–10% MeOH/CH<sub>2</sub>Cl<sub>2</sub>) (1.06 g, 5.4 mmol, 46%).

Melting point: 89–91 °C FTIR  $\nu_{\max}/\text{cm}^{-1}$  3437, 3122 (br), 1637, 1553, 1398, 1302. <sup>1</sup>H NMR (400 MHz, DMSO-*d*<sub>6</sub>)  $\delta$  ppm 2.89 (6 H, s), 5.81 (2 H, br. s), 6.68 – 6.72 (1 H, m), 6.76 (1 H, t, *J*=2.0 Hz), 6.83 – 6.87 (1 H, m), 7.19 (1 H, t, *J*=7.9 Hz) <sup>13</sup>C{<sup>1</sup>H} NMR (101 MHz, DMSO-*d*<sub>6</sub>)  $\delta$  ppm 37.4, 119.9, 121.7, 122.6, 130.3, 133.1, 152.0 153.4. HRMS (ESI Orbitrap) *m/z*: [M + H]<sup>+</sup> Calcd for C<sub>9</sub>H<sub>13</sub><sup>35</sup>ClN<sub>3</sub> [M + H]<sup>+</sup> 198.0793, found [M + H]<sup>+</sup> 198.0785

### 3-(3-Bromophenyl)-1,1-dimethylguanidine (57).

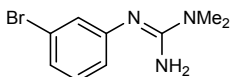

Using general procedure 1 with 3-bromoaniline (3.00 g, 17.4 mmol, 1 equiv), sodium hydride (0.84 g, 20.9 mmol, 1.2 equiv) and dimethylcyanamide (1.47 g, 20.9 mmol, 1.2 equiv), after 16 hours and the standard work-up procedure the crude product was purified by reverse-phase chromatography (kP-C<sub>18</sub>-HS cartridge 15-55% water/acetonitrile with 0.1% NH<sub>4</sub>HCO<sub>3</sub> buffer). The fractions containing product were evaporated to remove the acetonitrile and the aqueous pH increased to ~10 with NH<sub>4</sub>OH, which was then extracted with tBME (3 × 50 mL). The organic portion was then washed with brine, dried over anhydrous MgSO<sub>4</sub> and concentrated *in vacuo* to afford 3-(3-bromophenyl)-1,1-dimethylguanidine (**57**) as an off-white solid (883 mg, 3.7 mmol, 21%)

Melting point: 104–106 °C FTIR  $\nu_{\max}/\text{cm}^{-1}$  3437, 3128 (br), 1637, 1598, 1551, 1465, 1398. <sup>1</sup>H NMR (400 MHz, METHANOL-*d*<sub>4</sub>)  $\delta$  ppm 2.96 (6 H, s), 6.84 (1 H, ddd, *J*=7.8, 2.0, 1.2 Hz), 7.04 (1 H, t, *J*=2.0 Hz), 7.09 (1 H, ddd, *J*=7.8, 2.0, 1.2 Hz), 7.15 (1 H, t, *J*=7.8 Hz) <sup>13</sup>C{<sup>1</sup>H} NMR (101 MHz, METHANOL-*d*<sub>4</sub>)  $\delta$  ppm 38.0, 123.7, 124.1, 125.8, 128.2, 131.7, 153.7, 157.2 HRMS (ESI Orbitrap) *m/z*: [M + H]<sup>+</sup> Calcd for C<sub>9</sub>H<sub>13</sub><sup>79</sup>BrN<sub>3</sub> [M + H]<sup>+</sup> 242.0287, found [M + H]<sup>+</sup> 242.0275

### 2-(Benzo[d][1,3]dioxol-5-yl)-1,1-dimethylguanidine (58).

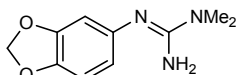

Using general procedure 1 with benzo[d][1,3]dioxol-5-amine (2.49 g, 29.5 mmol, 1 equiv), sodium hydride (1.58 g, 39.6 mmol, 1.3 equiv) and dimethylcyanamide (2.49 g, 35.5 mmol, 1.2 equiv), after 16 hours and the standard work-up and the resultant solid was washed with cold heptane and then EtOAc, and purified by chromatography (0–6% MeOH/CH<sub>2</sub>Cl<sub>2</sub>, Biotage KP-NH cartridge) to afford 2-(benzo[d][1,3]dioxol-5-yl)-1,1-dimethylguanidine (**58**) as a fluffy grey solid (2.63 g, 12.7 mmol, 43%)

Melting point: 137–138 °C FTIR  $\nu_{\max}/\text{cm}^{-1}$  3435, 3192 (br), 2898, 1634, 1574, 1437. <sup>1</sup>H NMR (400 MHz, METHANOL-*d*<sub>4</sub>)  $\delta$  ppm 2.97 (6 H, s), 5.91 (2 H, s), 6.36 (1 H, dd, *J*=8.2, 2.1 Hz), 6.43 (1 H, d, *J*=2.1 Hz), 6.75 (1 H, d, *J*=8.2 Hz) <sup>13</sup>C{<sup>1</sup>H} NMR (101 MHz, METHANOL-*d*<sub>4</sub>)  $\delta$  ppm 38.1, 102.2, 106.7, 109.4, 117.4, 144.5, 145.4, 149.7, 157.4 HRMS (ESI Orbitrap) *m/z*: [M + H]<sup>+</sup> Calcd for C<sub>10</sub>H<sub>14</sub>N<sub>3</sub>O<sub>2</sub> [M + H]<sup>+</sup> 208.1081, found [M + H]<sup>+</sup> 208.1070

### 1,1-Diethyl-2-phenylguanidine (59).

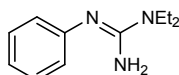

Using general procedure 1 with aniline (1.50 g, 16.1 mmol, 1 equiv), sodium hydride (0.869 g, 21.7 mmol, 1.4 equiv) and diethylcyanamide (1.74 g, 17.7 mmol, 1.1 equiv), after 24 hours using the standard work-up and purification by chromatography (0–10% MeOH/CH<sub>2</sub>Cl<sub>2</sub>) yielded 1,1-diethyl-2-phenylguanidine (**59**) as a white solid (1.09 g, 5.7 mmol, 35%).

Melting point: 59–61 °C FTIR  $\nu_{\max}/\text{cm}^{-1}$  3441, 3074 (br), 2976, 1637, 1543. <sup>1</sup>H NMR (400 MHz, METHANOL-*d*<sub>4</sub>)  $\delta$  ppm 1.22 (6 H, t, *J*=7.1 Hz), 3.41 (4 H, q, *J*=7.1 Hz), 6.89 – 6.95 (2 H, m), 7.00 (1 H, tt, *J*=7.4, 1.2 Hz), 7.25 – 7.33 (2 H, m) <sup>13</sup>C{<sup>1</sup>H} NMR (101 MHz, METHANOL-*d*<sub>4</sub>)  $\delta$  ppm 12.5, 41.6, 121.8, 124.0, 128.9, 150.2, 153.8 HRMS (ESI Orbitrap) *m/z*: [M + H]<sup>+</sup> Calcd for C<sub>11</sub>H<sub>18</sub>N<sub>3</sub> [M + H]<sup>+</sup> 192.1495, found [M + H]<sup>+</sup> 192.1488

### N-phenylpiperidine-1-carboximidamide (60).

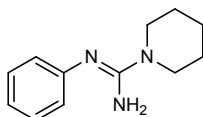

Using general procedure 1 with aniline (1.23 g, 13.2 mmol, 1 equiv), sodium hydride (0.643 g, 16.1 mmol, 1.2 equiv) and piperidine-1-carbonitrile (1.41 g, 12.8 mmol, 1.0 equiv) after 16 hours and the standard work-up was isolated *N*-phenylpiperidine-1-carboximidamide (**60**) by chromatography (1% triethylamine in EtOAc) (555 mg, 2.7 mmol, 21% based on piperidine-1-carbonitrile).

Melting point: 74–76 °C FTIR  $\nu_{\max}/\text{cm}^{-1}$  3435, 2857, 1637. <sup>1</sup>H NMR (400 MHz, METHANOL-*d*<sub>4</sub>)  $\delta$  ppm 1.57 – 1.76 (6 H, m), 3.37 – 3.45 (4 H, m), 6.87 – 6.94 (2 H, m), 7.00 (1 H, tt, *J*=7.4, 1.2 Hz), 7.25 – 7.33 (2 H, m) <sup>13</sup>C{<sup>1</sup>H} NMR (101 MHz, METHANOL-*d*<sub>4</sub>)  $\delta$  ppm 24.4, 25.5, 46.4, 121.9, 123.5, 128.9, 149.7, 155.6 HRMS (ESI Orbitrap) *m/z*: [M + H]<sup>+</sup> Calcd for C<sub>12</sub>H<sub>18</sub>N<sub>3</sub> [M + H]<sup>+</sup> 204.1495, found [M + H]<sup>+</sup> 204.1486

***N*-phenylmorpholine-4-carboximidamide (61).**

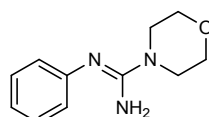

Using general procedure 1 with aniline (1.00 g, 10.7 mmol, 1 equiv), sodium hydride (0.589 g, 14.7 mmol, 1.4 equiv) and morpholine-4-carbonitrile (1.26 g, 11.3 mmol, 1.1 equiv) after 24 hours and the standard work-up was isolated *N*-phenylmorpholine-4-carboximidamide (**61**) as a white solid by chromatography (80% EtOAc/heptane → EtOAc w/ 2% triethylamine in EtOAc portions). (752 mg, 3.6 mmol, 34%)

Melting point: 131–133 °C FTIR  $\nu_{\max}/\text{cm}^{-1}$  3453, 3354, 2848  $^1\text{H}$  NMR (400 MHz, *METHANOL-d*<sub>4</sub>)  $\delta$  ppm 3.37 – 3.41 (4 H, m), 3.72 – 3.78 (4 H, m), 6.88 – 6.94 (2 H, m), 7.02 (1 H, tt,  $J=7.6, 1.2$  Hz), 7.31 (2 H, tt,  $J=7.6, 1.2$  Hz)  $^{13}\text{C}\{^1\text{H}\}$  NMR (101 MHz, *METHANOL-d*<sub>4</sub>)  $\delta$  ppm 45.9, 66.4, 122.2, 123.4, 129.0, 149.4, 155.7 HRMS (ESI Orbitrap)  $m/z$ :  $[\text{M} + \text{H}]^+$  Calcd for  $\text{C}_{11}\text{H}_{16}\text{N}_3\text{O}$   $[\text{M} + \text{H}]^+$  206.1288, found  $[\text{M} + \text{H}]^+$  206.1278

***2*-(4-bromophenyl)-1,1-diethylguanidine (62).**

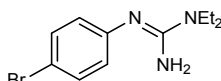

Using general procedure 1 with 4-bromoaniline (2.44 g, 14.2 mmol, 1 equiv), sodium hydride (0.732 g, 18.3 mmol, 1.3 equiv) and diethylcyanamide (1.61 g, 16.4 mmol, 1.2 equiv) after 24 hours at room temperature was added further diethylcyanamide (0.42 g, 4.3 mmol, 0.3 equiv). After a further 5 hours using the standard work-up was isolated 2-(4-bromophenyl)-1,1-diethylguanidine (**62**) as a white crystalline solid by chromatography (1% MeOH/EtOAc w/ 1% triethylamine in EtOAc portions) and subsequent recrystallisation (heptane/EtOAc) (700 mg, 2.6 mmol, 18%)

Melting point: 53–54 °C FTIR  $\nu_{\max}/\text{cm}^{-1}$  3453, 3139, 2976  $^1\text{H}$  NMR (400 MHz, *METHANOL-d*<sub>4</sub>)  $\delta$  ppm 1.17 (6 H, t,  $J=7.1$  Hz), 3.37 (4 H, q,  $J=7.1$  Hz), 6.70 – 6.88 (2 H, m), 7.28 – 7.44 (2 H, m)  $^{13}\text{C}\{^1\text{H}\}$  NMR (101 MHz, *METHANOL-d*<sub>4</sub>)  $\delta$  ppm 12.4, 41.6, 114.0, 125.8, 131.8, 149.7, 153.8 HRMS (ESI Orbitrap)  $m/z$ :  $[\text{M} + \text{H}]^+$  Calcd for  $\text{C}_{11}\text{H}_{17}^{79}\text{BrN}_3$   $[\text{M} + \text{H}]^+$  270.0600, found  $[\text{M} + \text{H}]^+$  270.0599

***N*-(4-bromophenyl)morpholine-4-carboximidamide (63).**

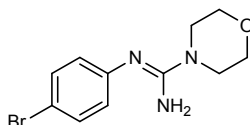

Using general procedure 1 with 4-bromoaniline (2.46 g, 14.3 mmol, 1 equiv), sodium hydride (0.78 g, 19.6 mmol, 1.4 equiv) and morpholine 4-carbonitrile (1.76 g, 15.7 mmol, 1.1 equiv) after 16 hours and chromatography (1–3% MeOH in EtOAc w/ 1% triethylamine in EtOAc portion) was isolated *N*-phenylmorpholine-4-carboximidamide (**63**) as an off-white solid (2.84 g, 10.0 mmol, 70%)

Melting point: 110–112 °C FTIR  $\nu_{\max}/\text{cm}^{-1}$  3447, 3069 (br), 2852, 1635, 1589, 1560, 1433  $^1\text{H}$  NMR (400 MHz, *METHANOL-d*<sub>4</sub>)  $\delta$  ppm 3.38 (4 H, t,  $J=4.8$  Hz), 3.74 (4 H, t,  $J=4.8$  Hz), 6.79 – 6.86 (2 H, m), 7.38 – 7.44 (2 H, m)  $^{13}\text{C}\{^1\text{H}\}$  NMR (101 MHz, *METHANOL-d*<sub>4</sub>)  $\delta$  ppm 45.8, 66.3, 114.4, 125.3, 131.9, 149.1, 155.6 HRMS (ESI Orbitrap)  $m/z$ :  $[\text{M} + \text{H}]^+$  Calcd for  $\text{C}_{11}\text{H}_{15}^{79}\text{BrN}_3\text{O}$   $[\text{M} + \text{H}]^+$  284.0393, found  $[\text{M} + \text{H}]^+$  284.0384

***N*-(2-bromophenyl)morpholine-4-carboximidamide (64).**

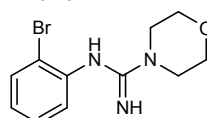

Using general procedure 1 with 2-bromoaniline (2.00 g, 11.6 mmol, 1 equiv), sodium hydride (0.61 g, 15.1 mmol, 1.3 equiv) and morpholine 4-carbonitrile (1.44 g, 12.9 mmol, 1.1 equiv) after 16 hours and chromatography (EtOAc:heptane, 1:1, w/ 2% triethylamine in EtOAc portion) was isolated a white solid. The solid was then recrystallised from TBME to yield *N*-(2-bromophenyl)morpholine-4-carboximidamide (**64**) as a white crystalline solid (1.48 g, 5.2 mmol, 45%)

Melting point: 98–100 °C FTIR  $\nu_{\max}/\text{cm}^{-1}$  3458, 3150 (br), 2974, 1630, 1546, 1426, 1275  $^1\text{H}$  NMR (400 MHz, *METHANOL-d*<sub>4</sub>)  $\delta$  ppm 3.41 – 3.47 (4 H, m), 3.74 – 3.79 (4 H, m), 6.94 (1 H, td,  $J=7.6, 1.6$  Hz), 6.98 (1 H, dd,  $J=8.0, 1.6$  Hz), 7.29 (1 H, td,  $J=7.6, 1.4$  Hz), 7.59 (1 H, dd,  $J=8.0, 1.4$  Hz)  $^{13}\text{C}\{^1\text{H}\}$  NMR (101 MHz, *METHANOL-d*<sub>4</sub>)  $\delta$  ppm 46.0, 66.4, 118.9, 123.7, 125.3, 128.1, 132.8, 148.2, 155.1 HRMS (ESI Orbitrap)  $m/z$ :  $[\text{M} + \text{H}]^+$  Calcd for  $\text{C}_{11}\text{H}_{15}^{79}\text{BrN}_3\text{O}$   $[\text{M} + \text{H}]^+$  284.0393, found  $[\text{M} + \text{H}]^+$  284.0384

**Solvent screen**

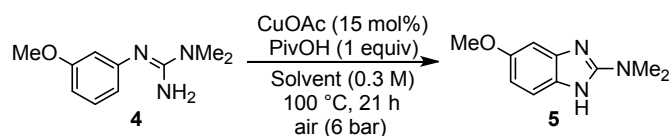

| Solvent            | Flash point | Product (5, HPLC Area %) | Starting material (4, HPLC area %) | Comments               |
|--------------------|-------------|--------------------------|------------------------------------|------------------------|
| Ethylene carbonate | 150 °C      | -                        | -                                  | <i>Decomposition</i>   |
| Ethylene glycol    | 111 °C      | 0%                       | > 90%                              | <i>Poor conversion</i> |
| NMP                | 91 °C       | 36%                      | 16%                                |                        |
| Octanoic acid      | 130 °C      | 0%                       | >90%                               | <i>Poor conversion</i> |

#### Screen of copper sources, additives and solvent for the cyclisation of 4.

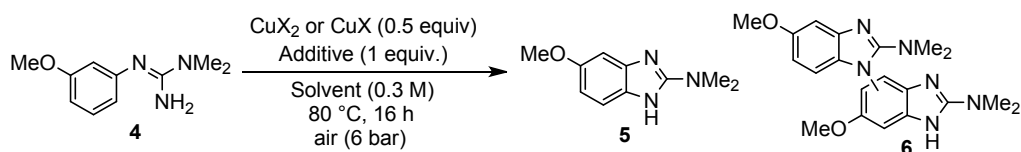

| Catalyst / Solvent / Additive          | [Cu] / mg | Additive / mg | 4 / HPLC % | 5 / HPLC % | 6 / HPLC % |
|----------------------------------------|-----------|---------------|------------|------------|------------|
| CuOAc / Sulfolane / PivOH              | 7.91      | s.s           | 30         | 45         | 5          |
| CuOAc / Sulfolane / AcOH               | 8.06      | s.s           | 33         | 42         | 6          |
| CuOAc / Sulfolane / NaOPiv             | 8.02      | 16.02         | 79         | 9          | 1          |
| CuOAc / Sulfolane / NaOAc              | 7.89      | 10.57         | 72         | 15         | 1          |
| CuOAc / DMSO / PivOH                   | 7.95      | s.s           | 45         | 19         | 6          |
| CuOAc / DMSO / AcOH                    | 7.89      | s.s           | 42         | 16         | 7          |
| CuOAc / DMSO / NaOPiv                  | 7.92      | 15.96         | 78         | 3          | 0.4        |
| CuOAc / DMSO / NaOAc                   | 7.92      | 10.57         | 80         | 5          | 0.8        |
| CuOAc / NMP / PivOH                    | 7.91      | s.s           | 25         | 33         | 13         |
| CuOAc / NMP / AcOH                     | 7.92      | s.s           | 27         | 32         | 12         |
| CuOAc / NMP / NaOPiv                   | 7.93      | 16.83         | 74         | 8          | 2          |
| CuOAc / NMP / NaOAc                    | 7.95      | 10.72         | 66         | 14         | 3          |
| CuTC / Sulfolane / PivOH               | 11.95     | s.s           | 34         | 27         | 7          |
| CuTC / Sulfolane / AcOH                | 12.59     | s.s           | 38         | 44         | 3          |
| CuTC / Sulfolane / NaOPiv              | 12.09     | 15.79         | 82         | 8          | 0.3        |
| CuTC / Sulfolane / NaOAc               | 11.81     | 10.58         | 51         | 19         | 7          |
| CuTC / DMSO / PivOH                    | 12.58     | s.s           | 66         | 17         | 2.4        |
| CuTC / DMSO / AcOH                     | 11.72     | s.s           | 67         | 17         | 2          |
| CuTC / DMSO / NaOPiv                   | 11.85     | 15.88         | 71         | 9          | 1.6        |
| CuTC / DMSO / NaOAc                    | 15.70     | 10.60         | 75         | 5          | 1.4        |
| CuTC / NMP / PivOH                     | 12.82     | s.s           | 37         | 30         | 7.5        |
| CuTC / NMP / AcOH                      | 12.29     | s.s           | 34         | 25         | 10         |
| CuTC / NMP / NaOPiv                    | 11.66     | 16.07         | 70         | 11         | 2          |
| CuTC / NMP / NaOAc                     | 15.72     | 10.60         | 57         | 18         | 4          |
| CuEH <sub>2</sub> / Sulfolane / PivOH  | 23.00     | s.s           | 63         | 30         | 0.5        |
| CuEH <sub>2</sub> / Sulfolane / AcOH   | 23.07     | s.s           | 53         | 35         | 1.5        |
| CuEH <sub>2</sub> / Sulfolane / NaOPiv | 23.24     | 15.86         | 60         | 27         | 2.5        |



|                                                               |       |        |    |     |     |
|---------------------------------------------------------------|-------|--------|----|-----|-----|
| CuEH <sub>2</sub> / Sulfolane / NaOAc                         | 23.30 | 10.61  | 39 | 33  | 8   |
| CuEH <sub>2</sub> / DMSO / PivOH                              | 23.08 | s.s    | 68 | 17  | 2   |
| CuEH <sub>2</sub> / DMSO / AcOH                               | 23.17 | s.s    | 69 | 16  | 2   |
| CuEH <sub>2</sub> / DMSO / NaOPiv                             | 23.52 | 15.88  | 72 | 9   | 2   |
| CuEH <sub>2</sub> / DMSO / NaOAc                              | 23.09 | 10.70  | 75 | 6   | 1   |
| CuEH <sub>2</sub> / NMP / PivOH                               | 23.55 | s.s    | 47 | 35  | 4   |
| CuEH <sub>2</sub> / NMP / AcOH                                | 23.22 | s.s    | 46 | 30  | 5   |
| CuEH <sub>2</sub> / NMP / NaOPiv                              | 23.04 | 15.90  | 66 | 14  | 5   |
| CuEH <sub>2</sub> / NMP / NaOAc                               | 22.60 | 10.58  | 59 | 17  | 6   |
| Cu 3-MeSal / Sulfolane / PivOH                                | 13.93 | s.s    | 55 | 29  | 0.8 |
| Cu 3-MeSal / Sulfolane / AcOH                                 | 13.99 | s.s    | 71 | 19  | 0   |
| Cu 3-MeSal / Sulfolane / NaOPiv                               | 14.01 | 15.93  | 91 | 2.5 | 0   |
| Cu 3-MeSal / Sulfolane / NaOAc                                | 13.97 | 10.67  | 55 | 10  | 4   |
| Cu 3-MeSal / DMSO / PivOH                                     | 13.99 | s.s    | 76 | 13  | 0   |
| Cu 3-MeSal / DMSO / AcOH                                      | 14.00 | s.s    | 62 | 11  | 2.5 |
| Cu 3-MeSal / DMSO / NaOPiv                                    | 14.00 | 15.95  | 70 | 7   | 2   |
| Cu 3-MeSal / DMSO / NaOAc                                     | 14.01 | 10.60  | 75 | 5   | 1   |
| Cu 3-MeSal / NMP / PivOH                                      | 14.00 | s.s    | 54 | 20  | 3.5 |
| Cu 3-MeSal / NMP / AcOH                                       | 14.34 | s.s    | 54 | 20  | 4   |
| Cu 3-MeSal / NMP / NaOPiv                                     | 13.89 | 15.96  | 62 | 13  | 4   |
| Cu 3-MeSal / NMP / NaOAc                                      | 13.94 | 10.70  | 67 | 10  | 3   |
| Cu(II)(acacF <sub>6</sub> ) <sub>2</sub> / Sulfolane / PivOH  | 30.94 | s.s    | 68 | 17  | 0.5 |
| Cu(II)(acacF <sub>6</sub> ) <sub>2</sub> / Sulfolane / AcOH   | 30.96 | s.s    | 78 | 14  | 0   |
| Cu(II)(acacF <sub>6</sub> ) <sub>2</sub> / Sulfolane / NaOPiv | 30.98 | 16.00  | 70 | 20  | 0.5 |
| Cu(II)(acacF <sub>6</sub> ) <sub>2</sub> / Sulfolane / NaOAc  | 31.24 | 10.61  | 74 | 9   | 0.5 |
| Cu(II)(acacF <sub>6</sub> ) <sub>2</sub> / DMSO / PivOH       | 31.65 | s.s    | 94 | 1   | 0   |
| Cu(II)(acacF <sub>6</sub> ) <sub>2</sub> / DMSO / NaOPiv      | 32.02 | 15.99  | 57 | 12  | 2.4 |
| Cu(II)(acacF <sub>6</sub> ) <sub>2</sub> / DMSO / NaOAc       | 30.96 | 10.92  | 54 | 11  | 4   |
| Cu(II)(acacF <sub>6</sub> ) <sub>2</sub> / NMP / PivOH        | 31.55 | s.s    | 82 | 7   | 0   |
| Cu(II)(acacF <sub>6</sub> ) <sub>2</sub> / NMP / AcOH         | 30.83 | s.s    | 84 | 7   | 0   |
| Cu(II)(acacF <sub>6</sub> ) <sub>2</sub> / NMP / NaOPiv       | 30.87 | 16.00  | 45 | 25  | 4   |
| Cu(II)(acacF <sub>6</sub> ) <sub>2</sub> / NMP / NaOAc        | 32.10 | 10.79  | 53 | 19  | 4   |
| Cu(II)(EAA) <sub>2</sub> / Sulfolane / PivOH                  | 20.95 | s.s    | 25 | 54  | 2   |
| Cu(II)(EAA) <sub>2</sub> / Sulfolane / AcOH                   | 20.98 | s.s    | 31 | 49  | 2   |
| Cu(II)(EAA) <sub>2</sub> / Sulfolane / NaOPiv                 | 21.02 | 15.98  | 80 | 9   | 0   |
| Cu(II)(EAA) <sub>2</sub> / Sulfolane / NaOAc                  | 21.11 | 10.45  | 71 | 9   | 0   |
| Cu(II)(EAA) <sub>2</sub> / DMSO / PivOH                       | 21.02 | s.s    | 41 | 32  | 0   |
| Cu(II)(EAA) <sub>2</sub> / DMSO / NaOPiv                      | 21.04 | 16.00  | 44 | 13  | 0.5 |
| Cu(II)(EAA) <sub>2</sub> / DMSO / NaOAc                       | 21.07 | 10.825 | 81 | 2   | 0   |
| Cu(II)(EAA) <sub>2</sub> / NMP / PivOH                        | 21.04 | s.s    | 10 | 43  | 0.4 |
| Cu(II)(EAA) <sub>2</sub> / NMP / AcOH                         | 21.05 | s.s    | 15 | 43  | 1   |
| Cu(II)(EAA) <sub>2</sub> c / NMP / NaOPiv                     | 21.18 | 16.00  | 56 | 19  | 0.5 |
| Cu(II)(EAA) <sub>2</sub> / NMP / NaOAc                        | 21.13 | 10.48  | 46 | 22  | 0   |
| Cu(NCMe) <sub>4</sub> .PF <sub>6</sub> / Sulfolane / PivOH    | 24.00 | s.s    | 52 | 24  | 5   |

|                                                             |       |       |    |    |     |
|-------------------------------------------------------------|-------|-------|----|----|-----|
| Cu(NCMe) <sub>4</sub> .PF <sub>6</sub> / Sulfolane / AcOH   | 24.01 | s.s   | 60 | 20 | 4   |
| Cu(NCMe) <sub>4</sub> .PF <sub>6</sub> / Sulfolane / NaOPiv | 24.02 | 16.00 | 78 | 7  | 0   |
| Cu(NCMe) <sub>4</sub> .PF <sub>6</sub> / Sulfolane / NaOAc  | 24.02 | 10.71 | 61 | 11 | 0.8 |
| Cu(NCMe) <sub>4</sub> .PF <sub>6</sub> / DMSO / PivOH       | 24.02 | s.s   | 83 | 9  | 0   |
| Cu(NCMe) <sub>4</sub> .PF <sub>6</sub> / DMSO / AcOH        | 24.02 | s.s   | 70 | 3  | 1   |
| Cu(NCMe) <sub>4</sub> .PF <sub>6</sub> / DMSO / NaOPiv      | 24.02 | 15.99 | 55 | 12 | 4   |
| Cu(NCMe) <sub>4</sub> .PF <sub>6</sub> / DMSO / NaOAc       | 24.01 | 10.46 | 53 | 11 | 4   |
| Cu(NCMe) <sub>4</sub> .PF <sub>6</sub> / NMP / PivOH        | 24.03 | s.s   | 58 | 9  | 2   |
| Cu(NCMe) <sub>4</sub> .PF <sub>6</sub> / NMP / AcOH         | 24.01 | s.s   | 64 | 7  | 3   |
| Cu(NCMe) <sub>4</sub> .PF <sub>6</sub> / NMP / NaOPiv       | 24.03 | 16.00 | 43 | 19 | 8   |
| Cu(NCMe) <sub>4</sub> .PF <sub>6</sub> NMP / NaOAc          | 24.04 | 10.52 | 54 | 16 | 2.5 |

*s.s = dispensed in stock solution of solvent. Mass accuracy given to 2.d.p as weighings were performed on a 4.d.p mg balance. EH = 2-ethylhexanoate, TC = thiophene 2-carboxylate, 3-MeSal = 3-methyl salicylic acid, EAA = ethyl acetoacetate*

### Design of Experiments Optimisation procedure

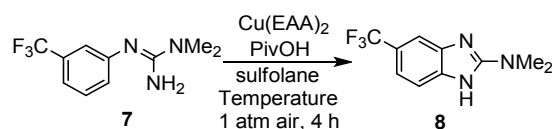

| Reaction number | 7 / mg | Cu(EAA) <sub>2</sub> / mg | Cu(EAA) <sub>2</sub> /mol% | Temperature / °C | PivOH / mg | PivOH / eq |
|-----------------|--------|---------------------------|----------------------------|------------------|------------|------------|
| 1               | 23.06  | 1.56                      | 4.9                        | 100              | 10.53      | 1.03       |
| 2               | 23.28  | 8.01                      | 24.7                       | 130              | 10.82      | 1.05       |
| 3               | 23.07  | 1.67                      | 5.2                        | 130              | 20.39      | 2.00       |
| 4               | 93.44  | 32.15                     | 24.7                       | 130              | 83.19      | 2.02       |
| 5               | 24.09  | 24.09                     | 24.1                       | 100              | 21.44      | 2.02       |
| 6               | 57.92  | 12.14                     | 15.1                       | 115              | 28.49      | 1.50       |
| 7               | 93.66  | 6.43                      | 4.9                        | 100              | 82.89      | 2.00       |
| 8               | 92.45  | 32.21                     | 25.0                       | 100              | 40.82      | 1.00       |
| 9               | 58.34  | 12.07                     | 14.9                       | 115              | 38.63      | 1.50       |
| 10              | 92.53  | 6.44                      | 5.0                        | 130              | 40.63      | 0.99       |

Table 1: masses used for DoE experimentation. Mass accuracy given to 2.d.p as weighings were performed on a 4.d.p mg balance.

The calculated statistical model fitted to the data is described below and imported directly from the DX10 Design of Experiments software.

### Response 2 Product %

Center Points Detected: The ANOVA is presented in two ways:

Adjusted model: The factorial model includes a curvature term, which separates the curvature from the lack-of-fit sum of squares. The adjusted model provides the factorial model coefficients you'd get if there were no center points and is used for diagnostics (by default).

Unadjusted model: The model coefficients are fit using all the data (including the center points) without a curvature term. The unadjusted model is used to create the model graphs and for optimization predictions.

### ANOVA Summary

|  | Adjusted | Model |  | Unadjusted | Model |
|--|----------|-------|--|------------|-------|
|--|----------|-------|--|------------|-------|

|               | F-value            | p-value        |             | F-value            | p-value        |                                                                                                                                                                                       |
|---------------|--------------------|----------------|-------------|--------------------|----------------|---------------------------------------------------------------------------------------------------------------------------------------------------------------------------------------|
| Model         | 110.16             | < 0.0001       | significant | 10.80              | 0.0073         | significant                                                                                                                                                                           |
| Curvature     | 65.43              | 0.0002         | significant |                    |                |                                                                                                                                                                                       |
| Lack of Fit   | 94.11              | 0.0781         |             | 935.36             | 0.0250         | Curvature appears significant. Augment to RSM if you want to explain what is causing the curvature or if curvature is in a desirable direction for your goal.<br><b>Model Summary</b> |
|               | <b>Adjusted</b>    | <b>Model</b>   |             | <b>Unadjusted</b>  | <b>Model</b>   |                                                                                                                                                                                       |
|               | <b>Coefficient</b> |                |             | <b>Coefficient</b> |                |                                                                                                                                                                                       |
| <b>Factor</b> | <b>Estimate</b>    | <b>p-value</b> |             | <b>Estimate</b>    | <b>p-value</b> |                                                                                                                                                                                       |
| Intercept     | 44.66              |                |             | 50.68              |                |                                                                                                                                                                                       |
| C-Catalyst    | 24.23              | < 0.0001       |             | 24.23              | 0.0026         |                                                                                                                                                                                       |
| D-Temp        | 4.64               | 0.0316         |             | 4.64               | 0.4113         |                                                                                                                                                                                       |
| Ctr Pt 1      | 30.06              | 0.0002         |             |                    |                |                                                                                                                                                                                       |

The following ANOVA is for a model that does not adjust for curvature.

| ANOVA for selected factorial model                             |         |    |         |        |          |             |
|----------------------------------------------------------------|---------|----|---------|--------|----------|-------------|
| Analysis of variance table [Partial sum of squares - Type III] |         |    |         |        |          |             |
|                                                                | Sum of  |    | Mean    | F      | p-value  |             |
| Source                                                         | Squares | df | Square  | Value  | Prob > F |             |
| Model                                                          | 4869.88 | 2  | 2434.94 | 10.80  | 0.0073   | significant |
| C-Catalyst                                                     | 4697.76 | 1  | 4697.76 | 20.83  | 0.0026   |             |
| D-Temp                                                         | 172.12  | 1  | 172.12  | 0.76   | 0.4113   |             |
| Residual                                                       | 1578.71 | 7  | 225.53  |        |          |             |
| Lack of Fit                                                    | 1578.43 | 6  | 263.07  | 935.36 | 0.0250   | significant |
| Pure Error                                                     | 0.28    | 1  | 0.28    |        |          |             |
| Cor Total                                                      | 6448.59 | 9  |         |        |          |             |

The following ANOVA is for a model that adjusts for curvature.

This is the default model used for the diagnostic plots.

This model is also used for prediction and model plots.

| ANOVA for selected factorial model                             |         |    |         |        |          |                 |
|----------------------------------------------------------------|---------|----|---------|--------|----------|-----------------|
| Analysis of variance table [Partial sum of squares - Type III] |         |    |         |        |          |                 |
|                                                                | Sum of  |    | Mean    | F      | p-value  |                 |
| Source                                                         | Squares | df | Square  | Value  | Prob > F |                 |
| Model                                                          | 4869.88 | 2  | 2434.94 | 110.16 | < 0.0001 | significant     |
| C-Catalyst                                                     | 4697.76 | 1  | 4697.76 | 212.54 | < 0.0001 |                 |
| D-Temp                                                         | 172.12  | 1  | 172.12  | 7.79   | 0.0316   |                 |
| Curvature                                                      | 1446.09 | 1  | 1446.09 | 65.43  | 0.0002   |                 |
| Residual                                                       | 132.62  | 6  | 22.10   |        |          |                 |
| Lack of Fit                                                    | 132.34  | 5  | 26.47   | 94.11  | 0.0781   | not significant |
| Pure Error                                                     | 0.28    | 1  | 0.28    |        |          |                 |
| Cor Total                                                      | 6448.59 | 9  |         |        |          |                 |

The Model F-value of 110.16 implies the model is significant. There is only a 0.01% chance that an F-value this large could occur due to noise.

Values of "Prob > F" less than 0.0500 indicate model terms are significant.

In this case C, D are significant model terms.

Values greater than 0.1000 indicate the model terms are not significant.

If there are many insignificant model terms (not counting those required to support hierarchy), model reduction may improve your model.

The "Curvature F-value" of 65.43 implies there is significant curvature (as measured by difference between the average of the center points and the average of the factorial points) in the design space. There is only a 0.02% chance that a "Curvature F-value" this large could occur due to noise.

The "Lack of Fit F-value" of 94.11 implies there is a 7.81% chance that a "Lack of Fit F-value" this large could occur due to noise. Lack of fit is bad -- we want the model to fit. This relatively low probability (<10%) is troubling.

|                   |        |                |        |
|-------------------|--------|----------------|--------|
| Std. Dev.         | 4.70   | R-Squared      | 0.9735 |
| Mean              | 50.68  | Adj R-Squared  | 0.9647 |
| C.V. %            | 9.28   | Pred R-Squared | 0.9321 |
| PRESS             | 339.91 | Adeq Precision | 19.820 |
| -2 Log Likelihood | 54.23  | BIC            | 61.14  |
|                   |        | AICc           | 64.23  |

The "Pred R-Squared" of 0.9321 is in reasonable agreement with the "Adj R-Squared" of 0.9647; i.e. the difference is less than 0.2.

"Adeq Precision" measures the signal to noise ratio. A ratio greater than 4 is desirable. Your ratio of 19.820 indicates an adequate signal. This model can be used to navigate the design space.

|            | Coefficient |    | Standard | 95% CI | 95% CI |      |
|------------|-------------|----|----------|--------|--------|------|
| Factor     | Estimate    | df | Error    | Low    | High   | VIF  |
| Intercept  | 44.66       | 1  | 1.66     | 40.60  | 48.73  |      |
| C-Catalyst | 24.23       | 1  | 1.66     | 20.17  | 28.30  | 1.00 |
| D-Temp     | 4.64        | 1  | 1.66     | 0.57   | 8.71   | 1.00 |
| Ctr Pt 1   | 30.06       | 1  | 3.72     |        |        |      |

**Final Equation in Terms of Coded Factors:**

|           |     |
|-----------|-----|
| Product % | =   |
| +44.66    |     |
| +24.23    | * C |
| +4.64     | * D |

The equation in terms of coded factors can be used to make predictions about the response for given levels of each factor. By default, the high levels of the factors are coded as +1 and the low levels of the factors are coded as -1. The coded equation is useful for identifying the relative impact of the factors by comparing the factor coefficients.

**Final Equation in Terms of Actual Factors:**

|           |            |
|-----------|------------|
| Product % | =          |
| -21.23251 |            |
| +2.42326  | * Catalyst |
| +0.30923  | * Temp     |

The equation in terms of actual factors can be used to make predictions about the response for given levels of each factor. Here, the levels should be specified in the original units for each factor. This equation should not be used to determine the relative impact of each factor because the coefficients are scaled to accommodate the units of each factor and the intercept is not at the center of the design space.

Proceed to Diagnostic Plots (the next icon in progression). Be sure to look at the:

- 1) Normal probability plot of the studentized residuals to check for normality of residuals.
- 2) Studentized residuals versus predicted values to check for constant error.
- 3) Externally Studentized Residuals to look for outliers, i.e., influential values.
- 4) Box-Cox plot for power transformations.

If all the model statistics and diagnostic plots are OK, finish up with the Model Graphs icon.

**Internal standard calculations for 7 and 8**

$$K_x = \frac{\%_{Int.Std.} / \%_x}{Wt_{Int.Std.} / Wt_x}$$

Equation 1:  $K_x$  value calculation from stock solutions of known amount of 4,4'-di-tertbutyl-1,1'-biphenyl and **X** where  $X = 7$  or **8**

5-Trifluoromethyl-*N,N*-dimethyl-1*H*-benzo[d]imidazol-2-amine (**8**) and 4,4'-di-tertbutyl-1,1'-biphenyl (internal standard) were made up to a 25 mL solution in acetonitrile in a volumetric flask.  $K_x$  calculations were performed using equation 1 with HPLC peak area response % (PAR%). Masses were recorded on a 5-figure balance.

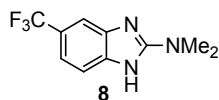

| Int. Std. / mg     | <b>8</b> / mg | Acetonitrile / mL | <b>8</b> PAR% | Int. Std. PAR% | $K_x$        |
|--------------------|---------------|-------------------|---------------|----------------|--------------|
| 28.5               | 26.7          | 25                | 79.368        | 20.632         | 0.243        |
| 28.5               | 26.7          | 25                | 79.241        | 20.759         | 0.245        |
| 27.6               | 26.7          | 25                | 79.761        | 20.339         | 0.244        |
| 27.6               | 25.7          | 25                | 79.700        | 20.300         | 0.244        |
| <i>Kx</i> average: |               |                   |               |                | <b>0.244</b> |

Table 2: **8**  $K_x$  calculations. Masses were recorded on a 5-figure balance.

1,1-Dimethyl-2-(3-(trifluoromethyl)phenyl)guanidine (**7**) and 4,4'-di-tertbutyl-1,1'-biphenyl (internal standard) were made up to a 25 mL solution in acetonitrile in a volumetric flask.  $K_x$  calculations were performed using equation 1 with HPLC peak area response % (PAR%). Masses were recorded on a 5-figure balance.

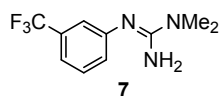

| Int. Std. / mg     | <b>7</b> / mg | Acetonitrile / mL | <b>7</b> PAR% | Int. Std. PAR% | $K_x$        |
|--------------------|---------------|-------------------|---------------|----------------|--------------|
| 8.9                | 18.9          | 25                | 66.913        | 33.087         | 1.050        |
| 8.9                | 18.9          | 25                | 66.892        | 33.108         | 1.051        |
| 8.6                | 27            | 25                | 74.791        | 25.209         | 1.058        |
| 8.6                | 27            | 25                | 74.865        | 25.135         | 1.054        |
| 8.5                | 23.4          | 25                | 72.59         | 27.41          | 1.040        |
| 8.5                | 23.4          | 25                | 72.561        | 27.439         | 1.041        |
| 8.2                | 22.8          | 25                | 72.398        | 27.602         | 1.060        |
| 8.2                | 22.8          | 25                | 72.48         | 27.52          | 1.056        |
| <i>Kx</i> average: |               |                   |               |                | <b>1.051</b> |

Table 3: **7**  $K_x$  calculations. Masses were recorded on a 5-figure balance.

### Kinetic isotope effect

$K_x$  calculations were performed with substrates **27** and **28** as described previously. Through use of an internal standard (4,4'-di-*tert*-butylbiphenyl) the rate of consumption of aryl-guanidine was monitored by HPLC analysis. Taking a log-plot of aryl-guanidine vs. time and taking a ratio of the gradients from the resultant straight line plot the K.I.E was calculated.  $0.0021 / 0.0015 = 1.4$ . This result comes from an  $n = 2$ .

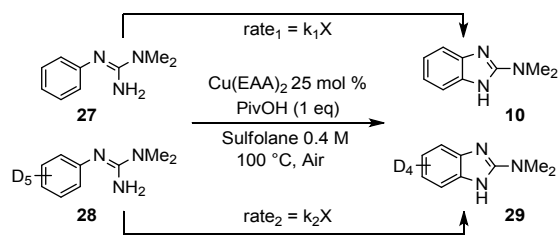

Consumption of aryl-guanidine vs time

Plot

in

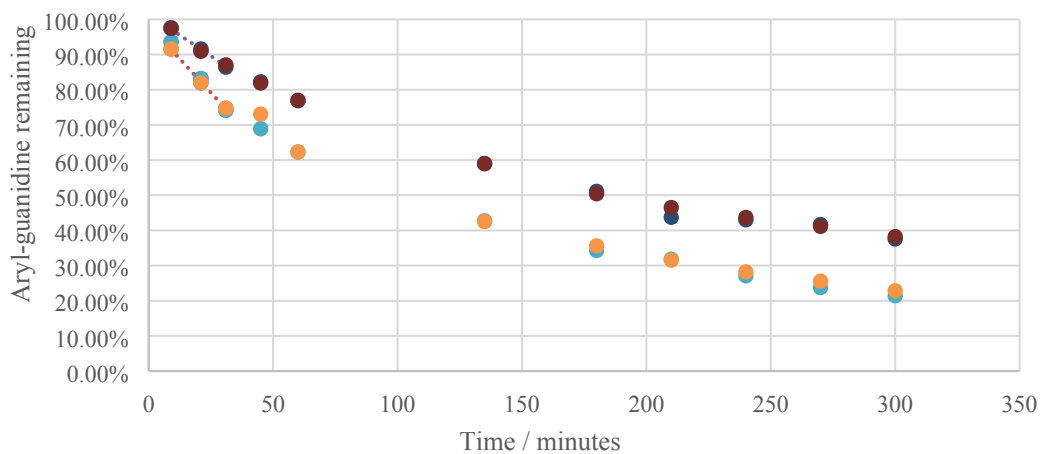

Log (aryl guanidine %) vs time

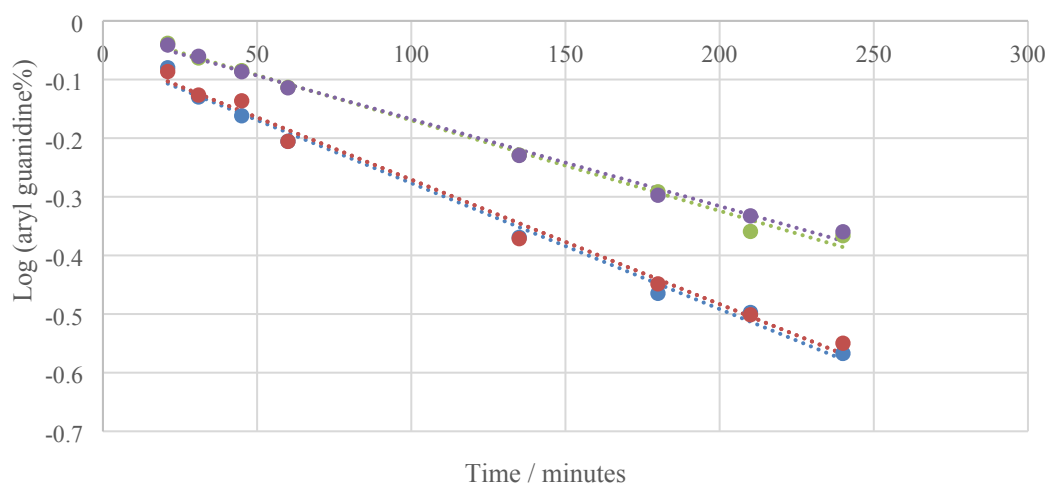

orange/baby blue is consumption of **27**, plot in red/dark blue is consumption of **28**

### Different additives experimental procedure

The table below summarises the solution yield of **8** using the internal standard 4,4'-di-*tert*-butyl-1,1'-biphenyl. Reactions at short time points remained unchanged after 16 hours/960 mins.

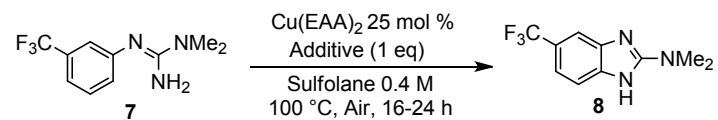

| Additive                                  | Time / minutes | Product ( <b>8</b> ) / % | Additive                | Time / minutes | Product ( <b>8</b> ) / % |
|-------------------------------------------|----------------|--------------------------|-------------------------|----------------|--------------------------|
| Pivalic acid                              | 1440           | 54                       | Acetic acid             | 960            | 41                       |
| Adamantane carboxylic acid                | 1440           | 45                       | Trifluoroacetic acid    | 960            | < 1                      |
| Benzoic acid                              | 960            | 21                       | Methane sulfonic acid   | 960            | 0 <sup>a</sup>           |
| Trimethylbenzoic acid                     | 960            | 37                       | p-Toluenesulfonic acid  | 960            | 0 <sup>a</sup>           |
| 2,4,6-triethylbenzoic acid                | 960            | 44                       | Phenylphosphonic acid   | 960            | *                        |
| 2,4,6-tri- <i>tert</i> -butylbenzoic acid | 960            | 53                       | Oxalic acid             | 240            | 0                        |
| p-methoxybenzoic acid                     | 960            | 41                       | Oxamic acid             | 240            | *                        |
| p-nitrobenzoic acid                       | 960            | 23                       | Citric acid             | 240            | 0                        |
| 3,4,5-trifluorobenzoic acid               | 960            | 16                       | 2-hydroxypropanoic acid | 960            | 9                        |
| 3,4,5-trimethoxybenzoic acid              | 960            | 42                       | Ethyl acetoacetate      | 240            | 3                        |
| Triphenylacetic acid                      | 240            | 3                        | Cyanamide               | 960            | < 1                      |
| Alanine                                   | 150            | 0                        | Phenol                  | 960            | 6                        |
| 2-aminoisobutyric acid                    | 150            | 0                        | 2-hydroxypyridine       | 960            | 14                       |

|                       |     |    |  |                 |     |    |
|-----------------------|-----|----|--|-----------------|-----|----|
| 2-phenylbenzoic acid  | 960 | 40 |  | Benzamidine     | 960 | 12 |
| 2-hydroxybenzoic acid | 960 | 4  |  | Benzamidine.HCl | 960 | 1  |
| 3-hydroxypyridine     | 960 | 0  |  |                 |     |    |

*<sup>a</sup>no conversion of starting material. \*reaction heterogenous and sampling not accurate.*



### 1H NMR spectra of known compounds

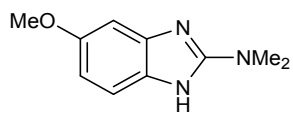

5-Methoxy-N,N-dimethyl-1H-benzo[d]imidazol-2-amine (5)

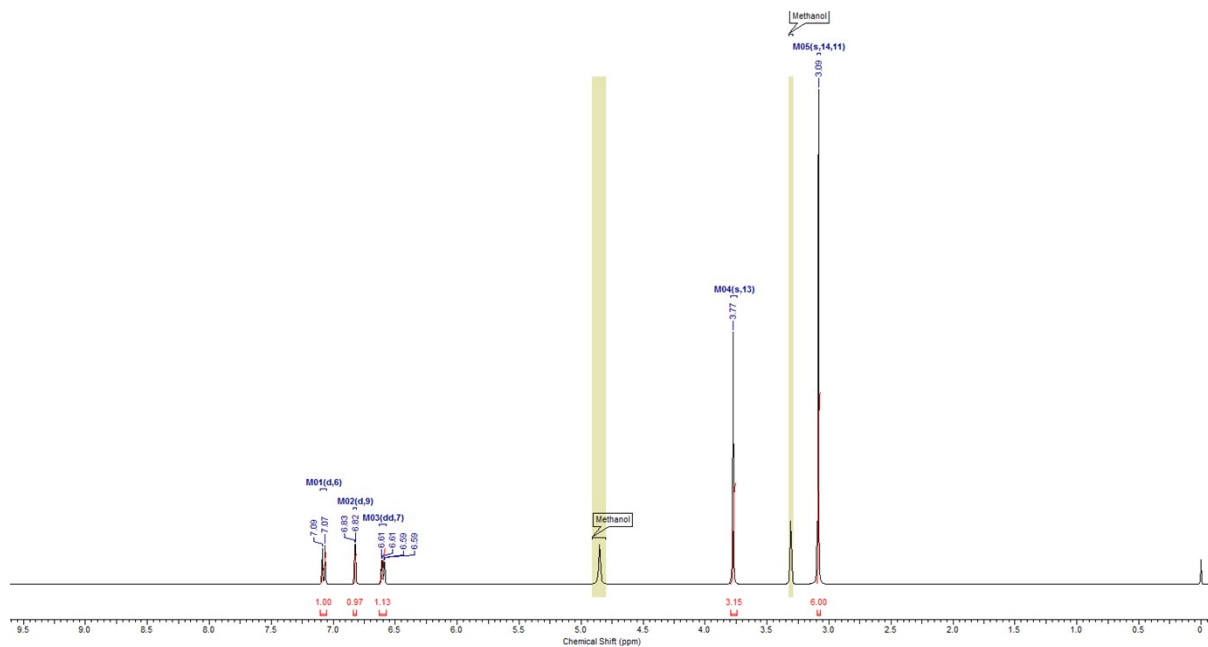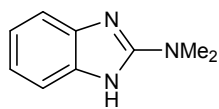

N,N-dimethyl-1H-benzo[d]imidazol-2-amine (10)

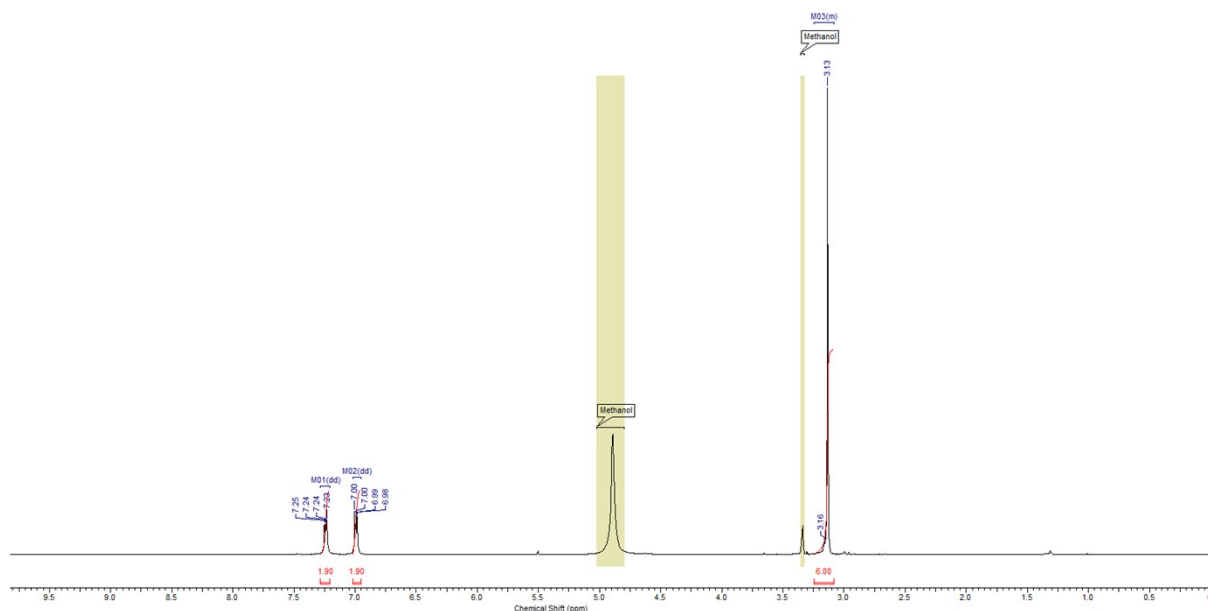

2-(Dimethylamino)-1H-benzo[d]imidazole-6-carbonitrile (**13**)

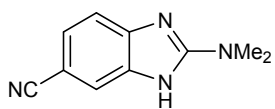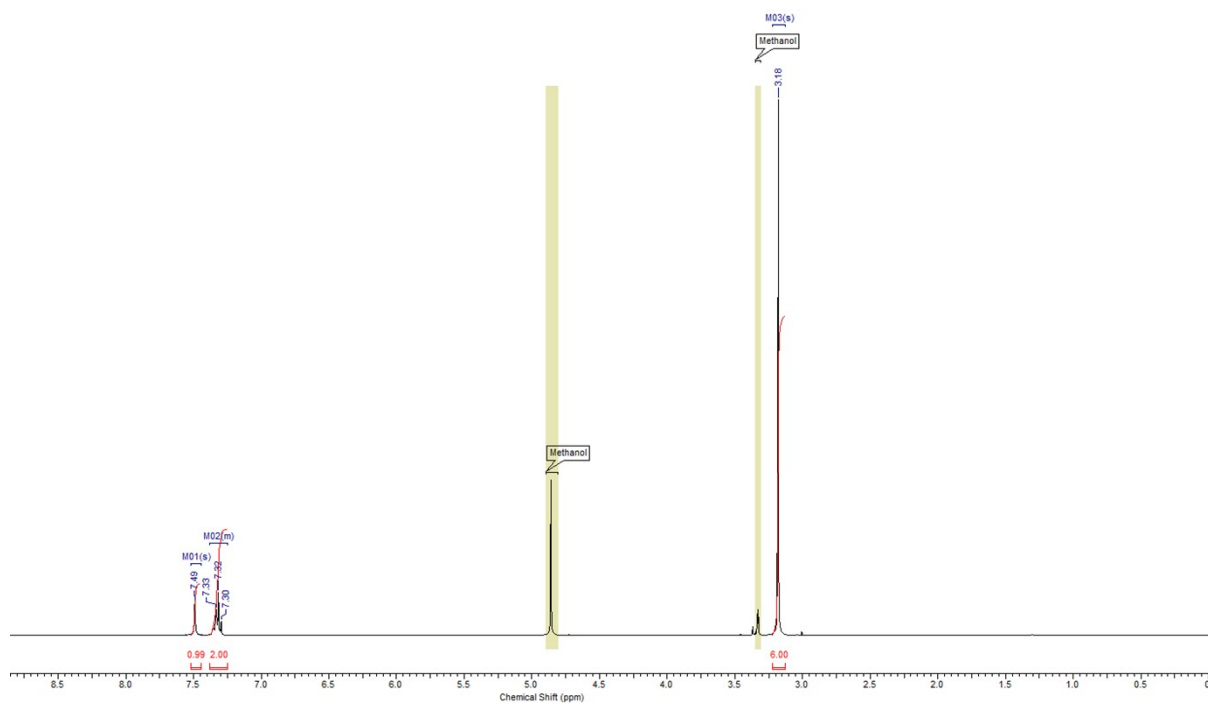

5-Bromo-N,N-dimethyl-1H-benzo[d]imidazol-2-amine (**14**)

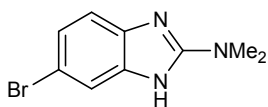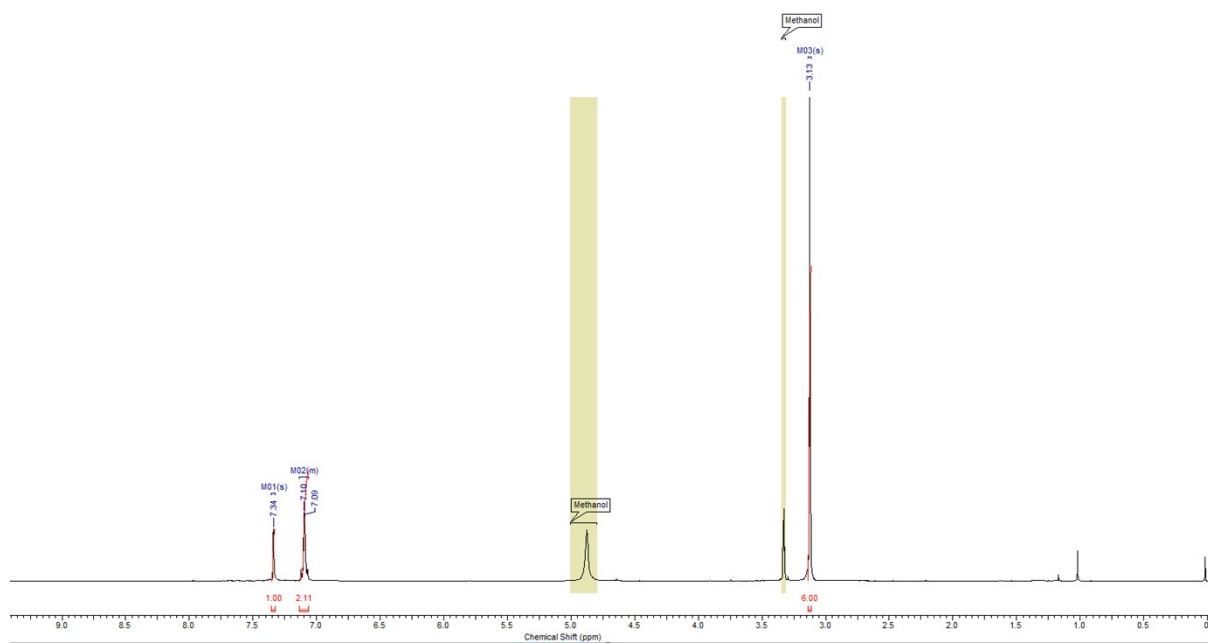

5-chloro-*N,N*-dimethyl-1*H*-benzo[*d*]imidazol-2-amine (**15**)

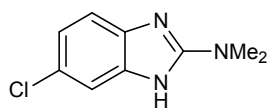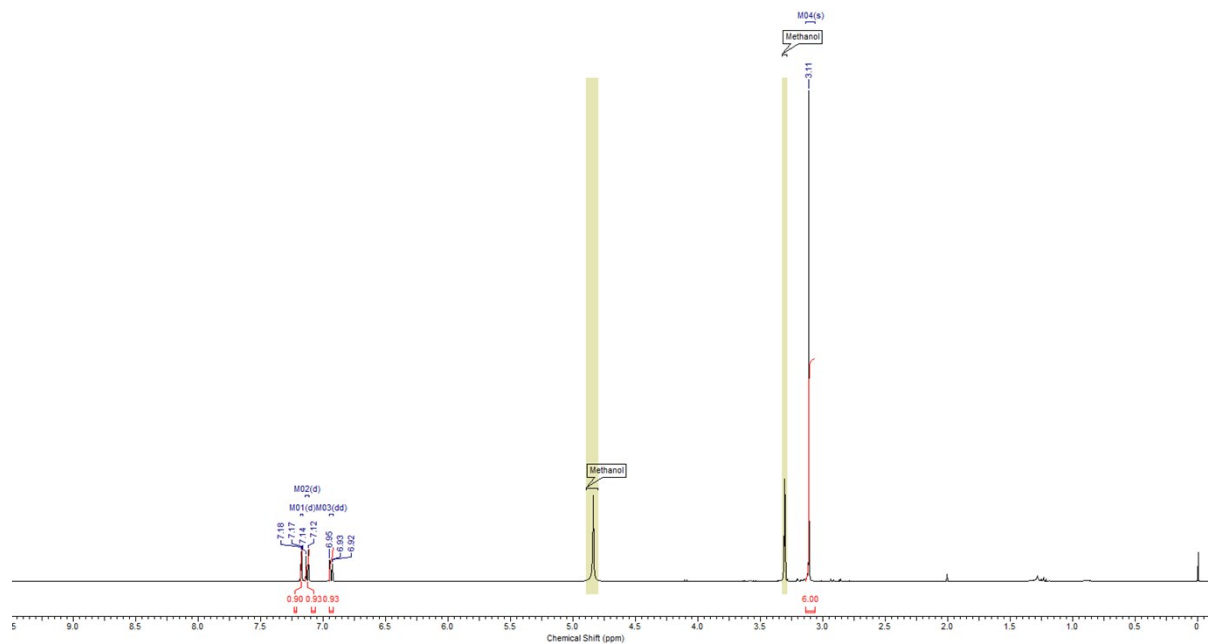

2-(Piperidin-1-yl)-1*H*-benzo[*d*]imidazole (**23**)

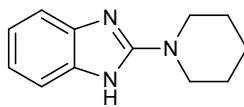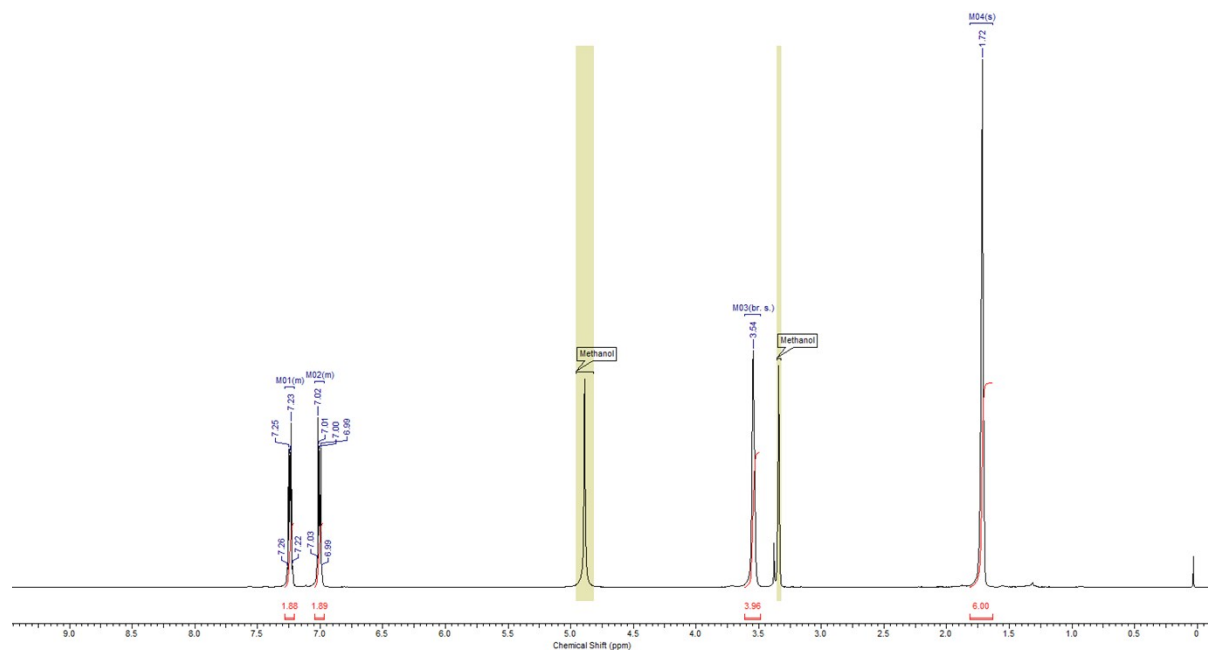

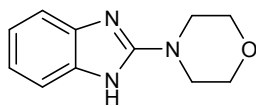

4-(1H-Benzo[d]imidazol-2-yl)morpholine (**24**)

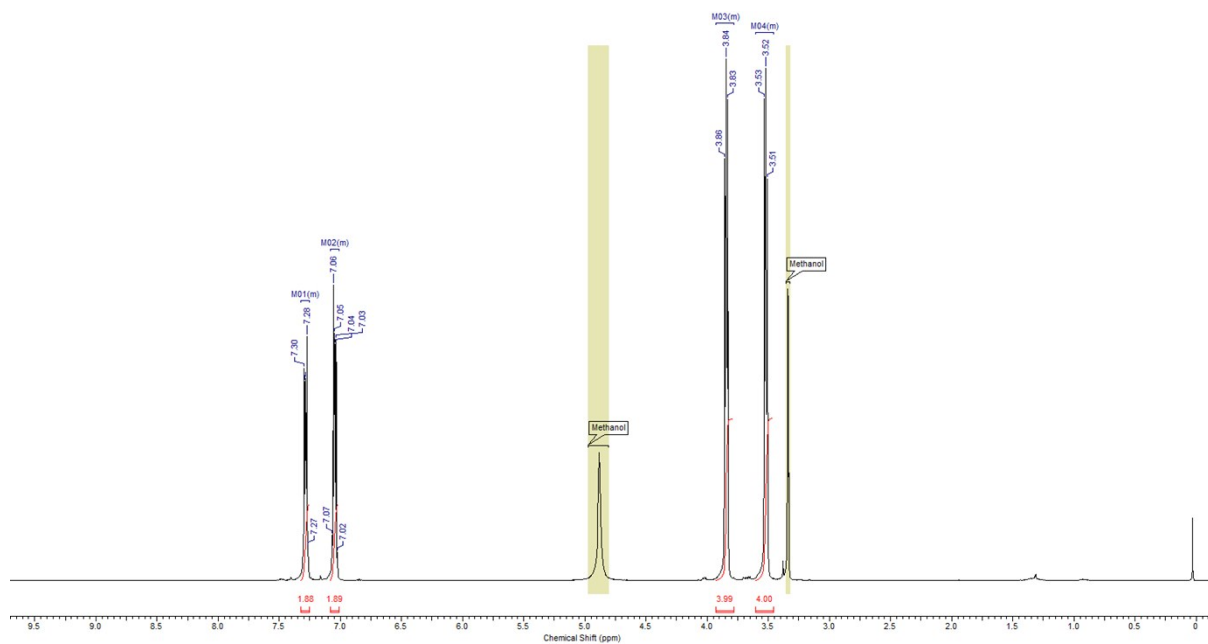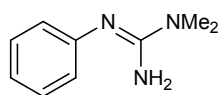

1,1-Dimethyl-2-phenylguanidine (**27**)

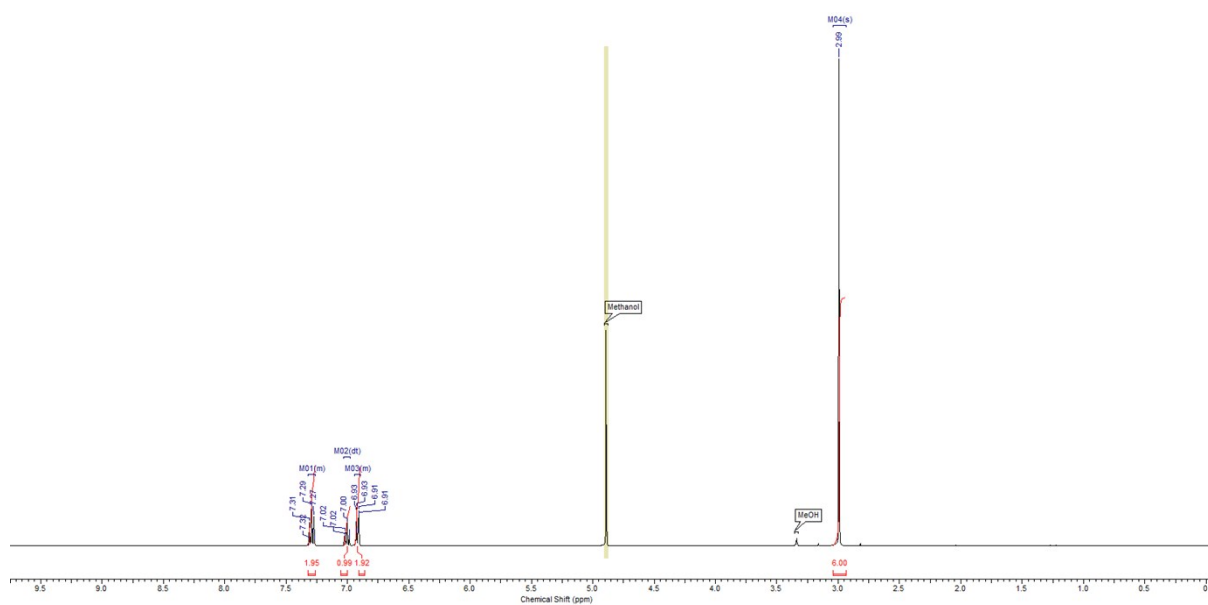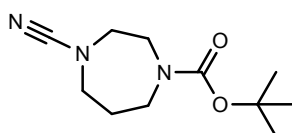

4-cyano-1,4-diazepane-1-carboxylate (**45**)

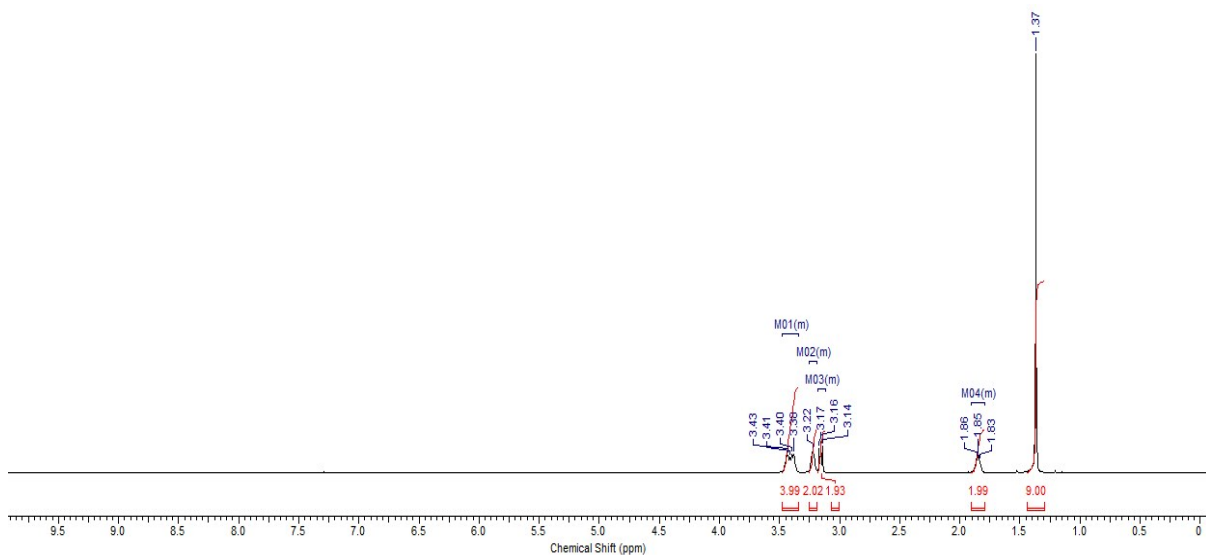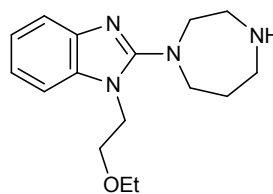

2-(1,4-Diazepan-1-yl)-1-(2-ethoxyethyl)-1H-benzo[d]imidazole (**50**)

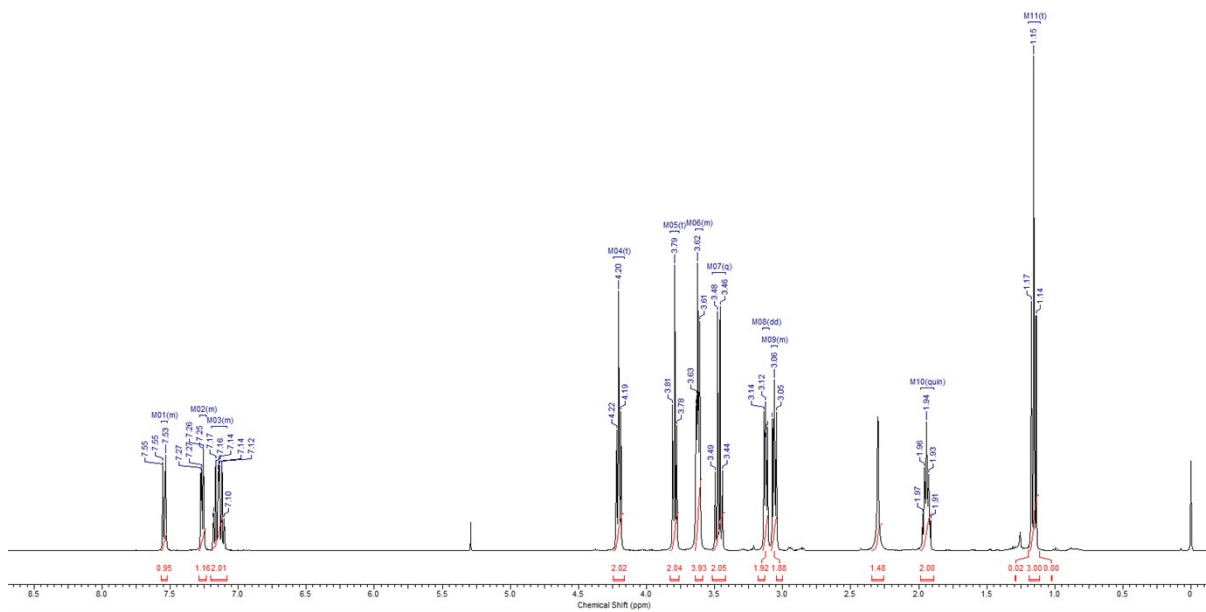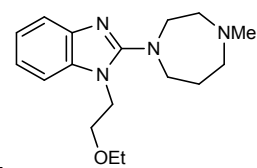

2-(4-Methyl-1,4-diazepan-1-yl)-1-(2-ethoxyethyl)-1H-benzo[d]imidazole, Emedastine (**2**).

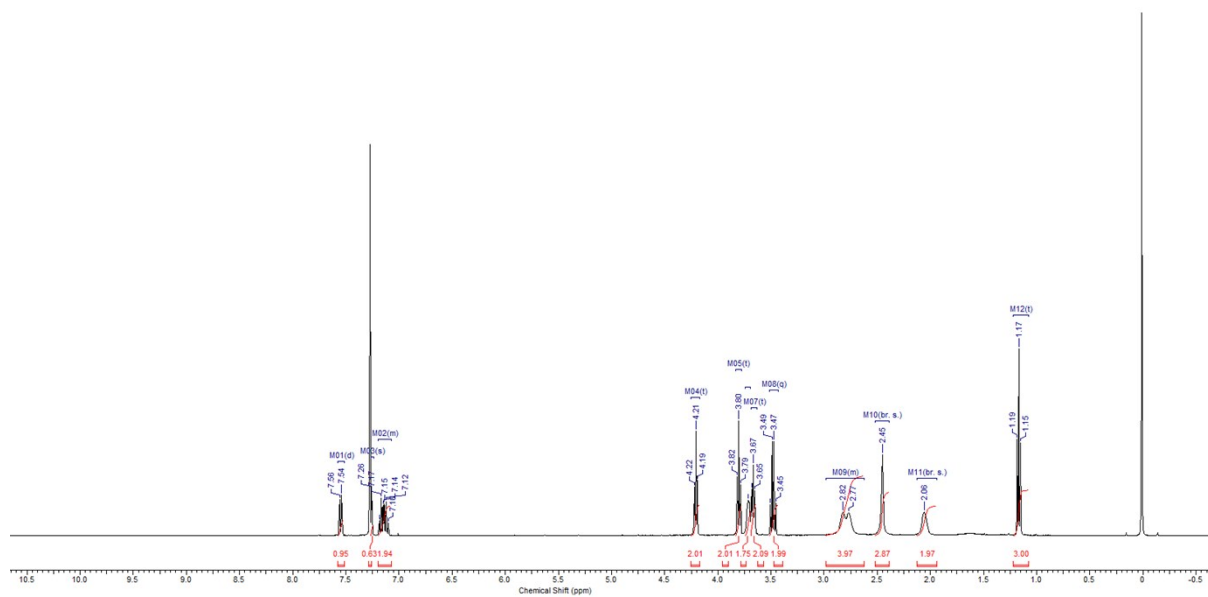

**NMR Spectra of novel compounds**

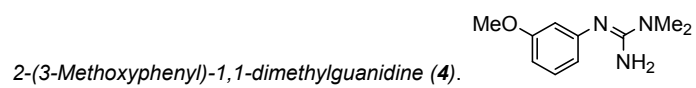

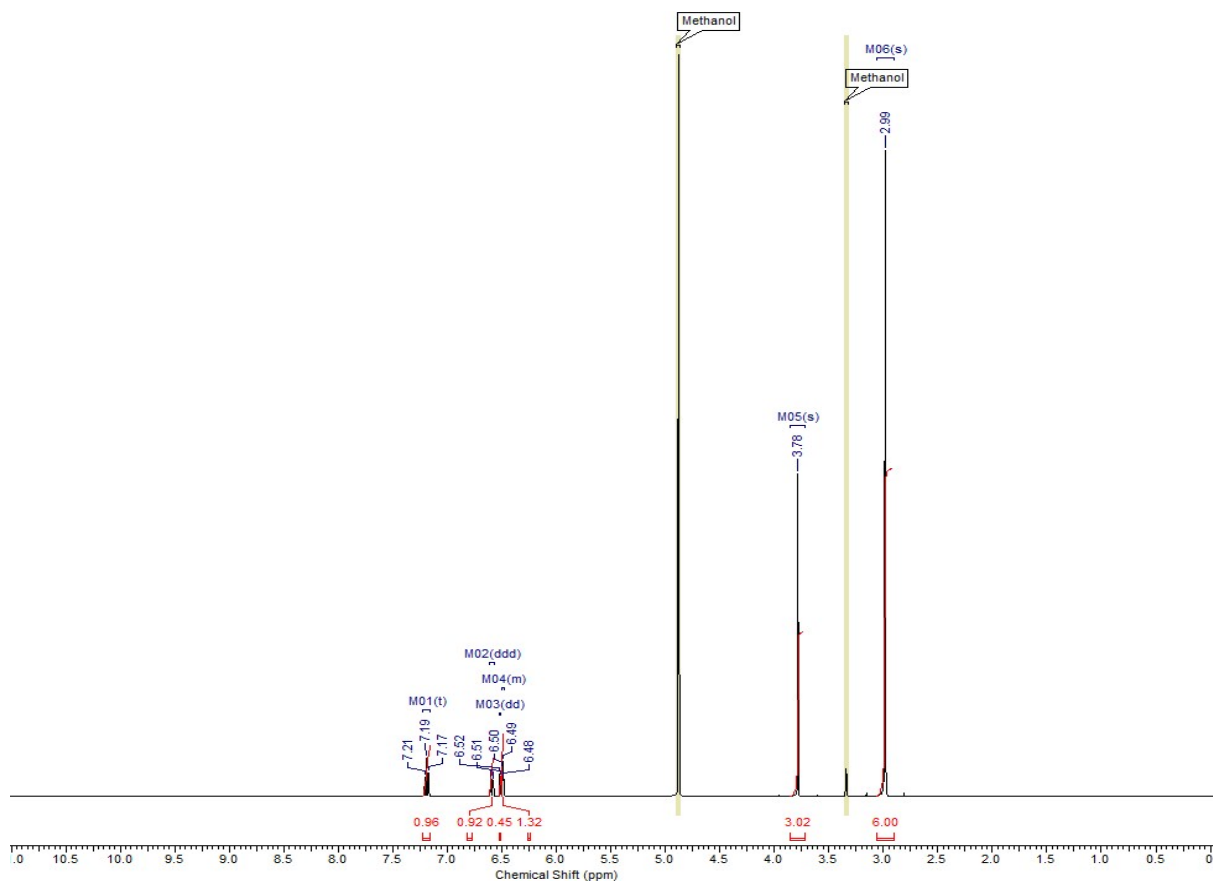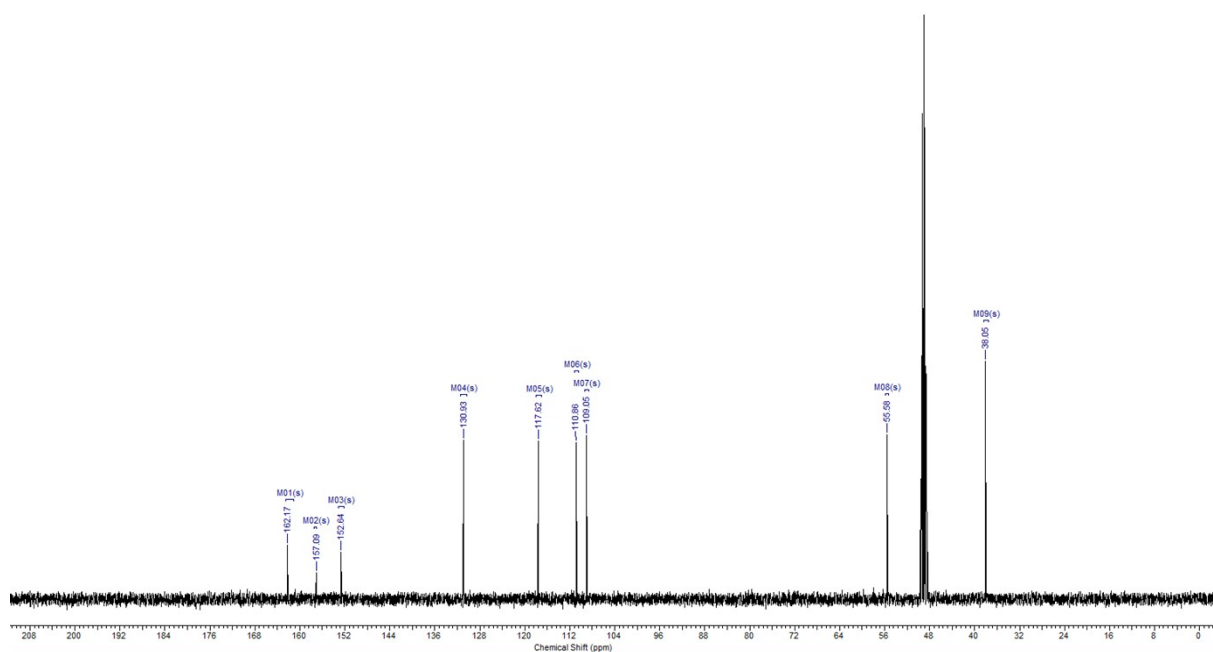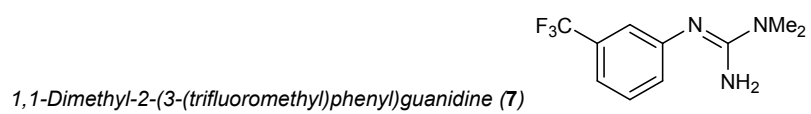

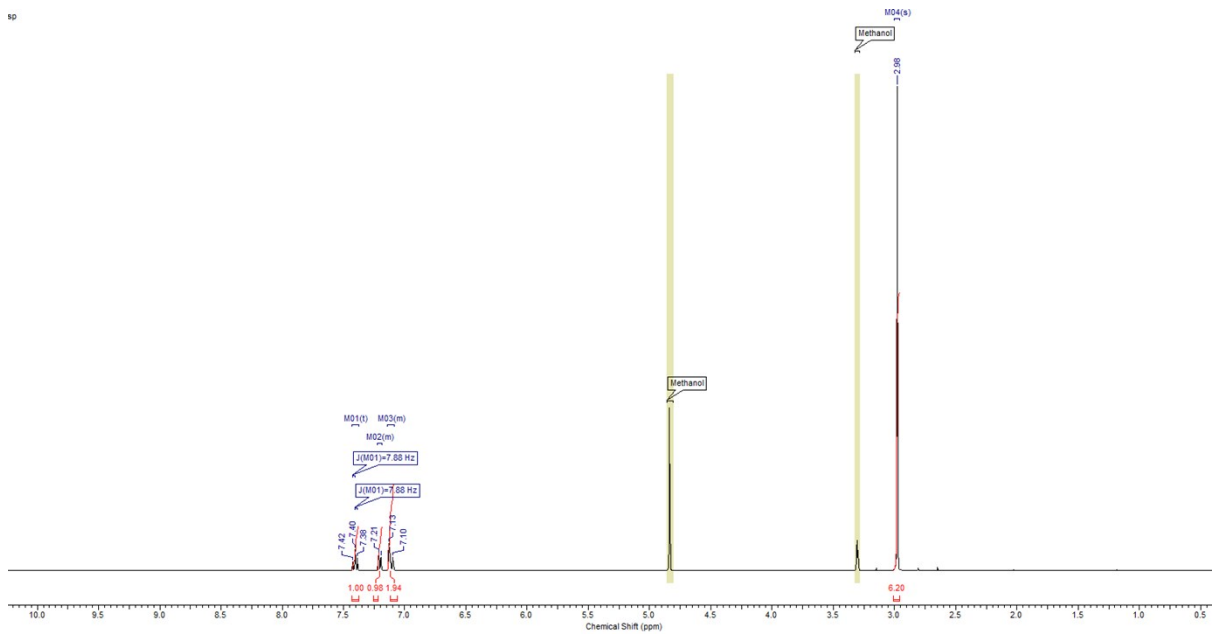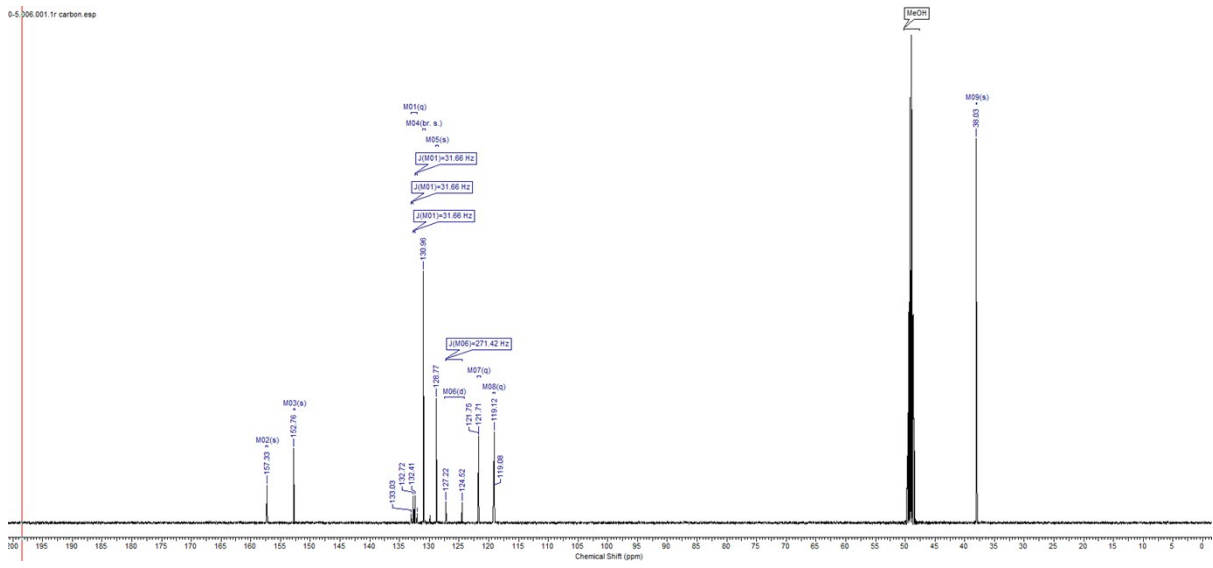



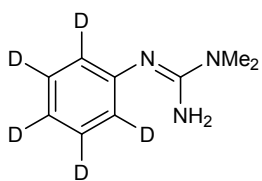

1-Dimethyl-2-phenyl( $D_5$ )guanidine (**28**)

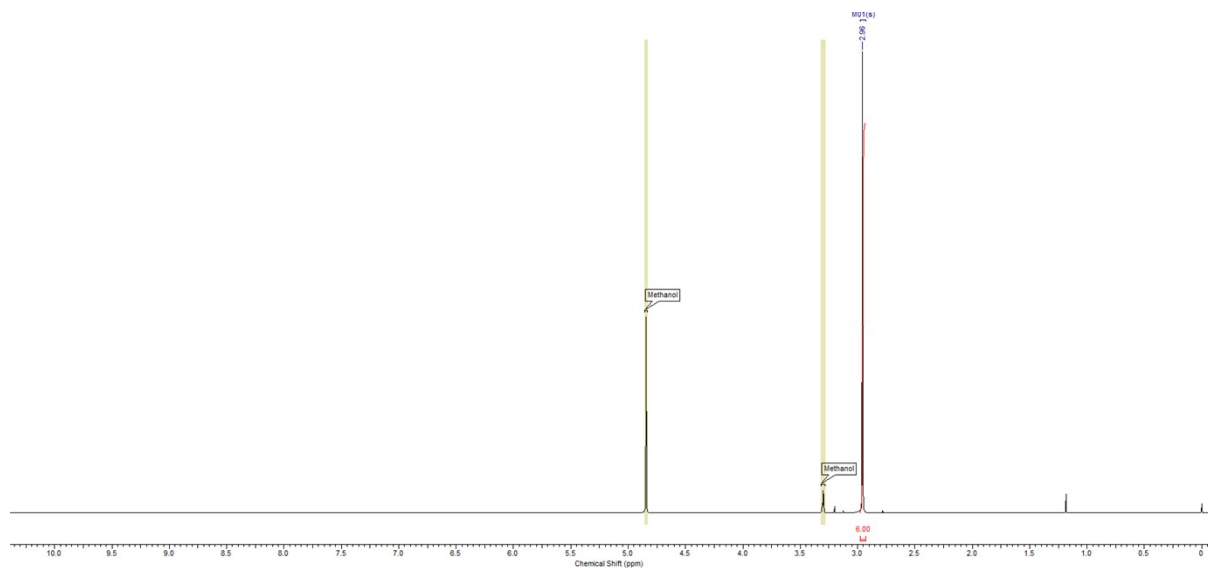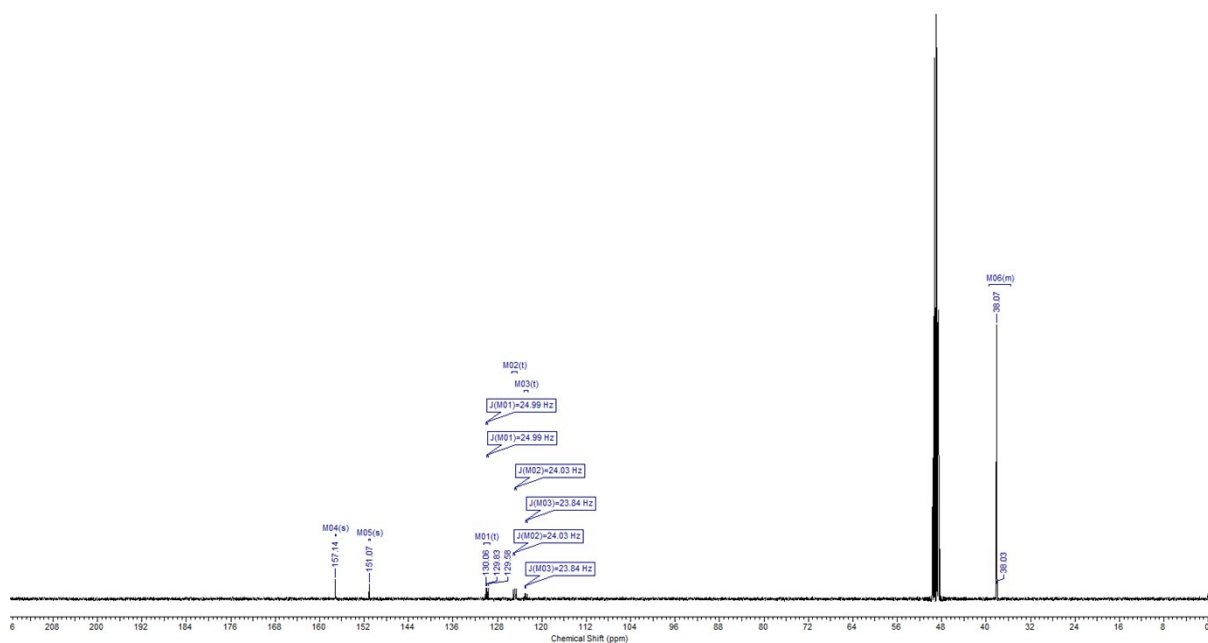



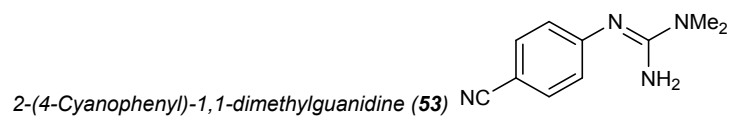

001.001.1r proton.esp

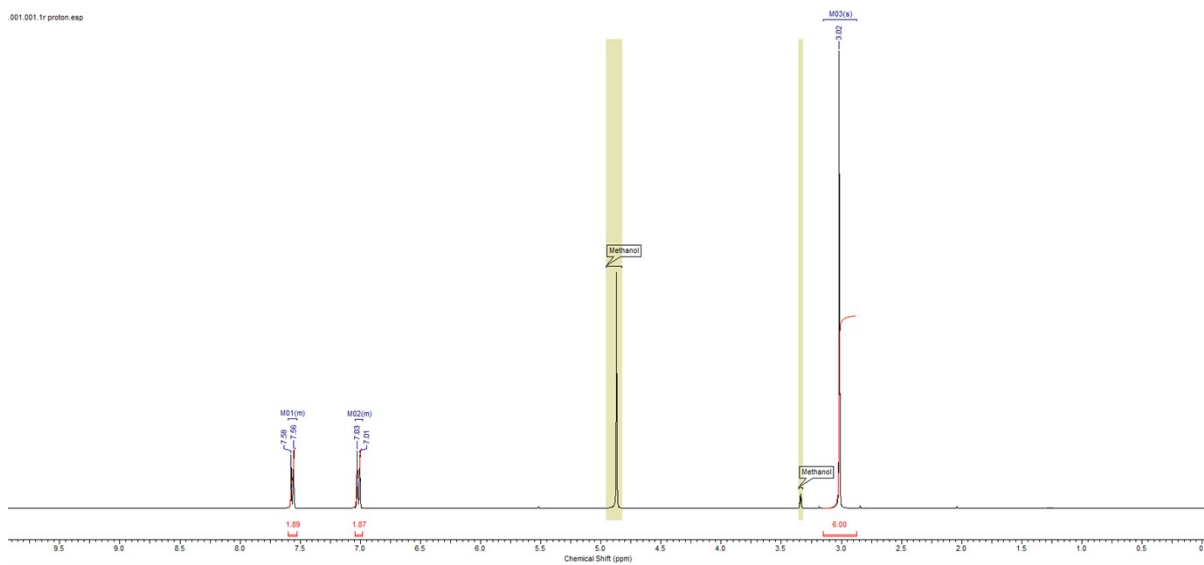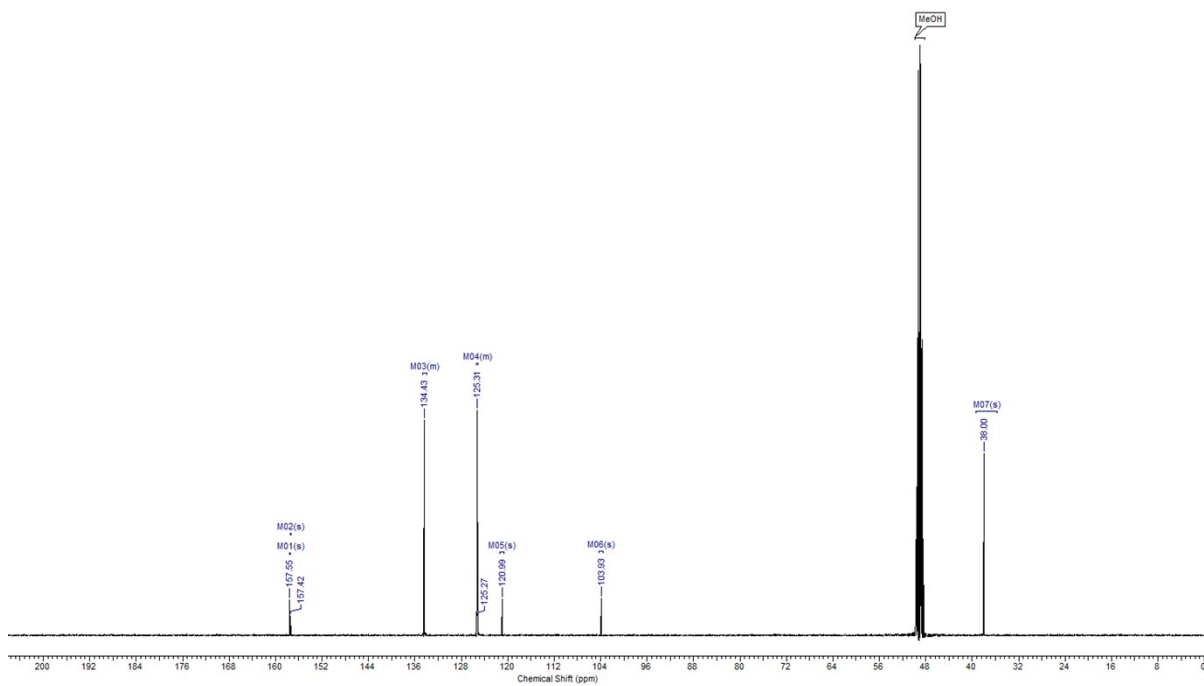

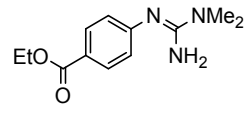

Ethyl 4-((amino(dimethylamino)methylene)amino) benzoate (52)

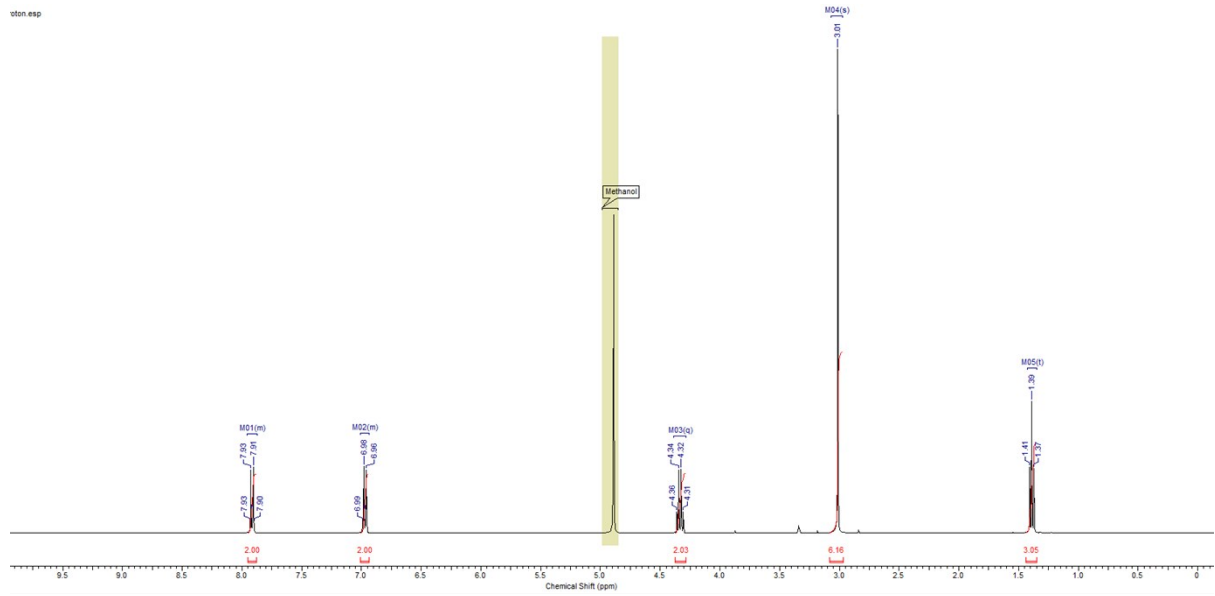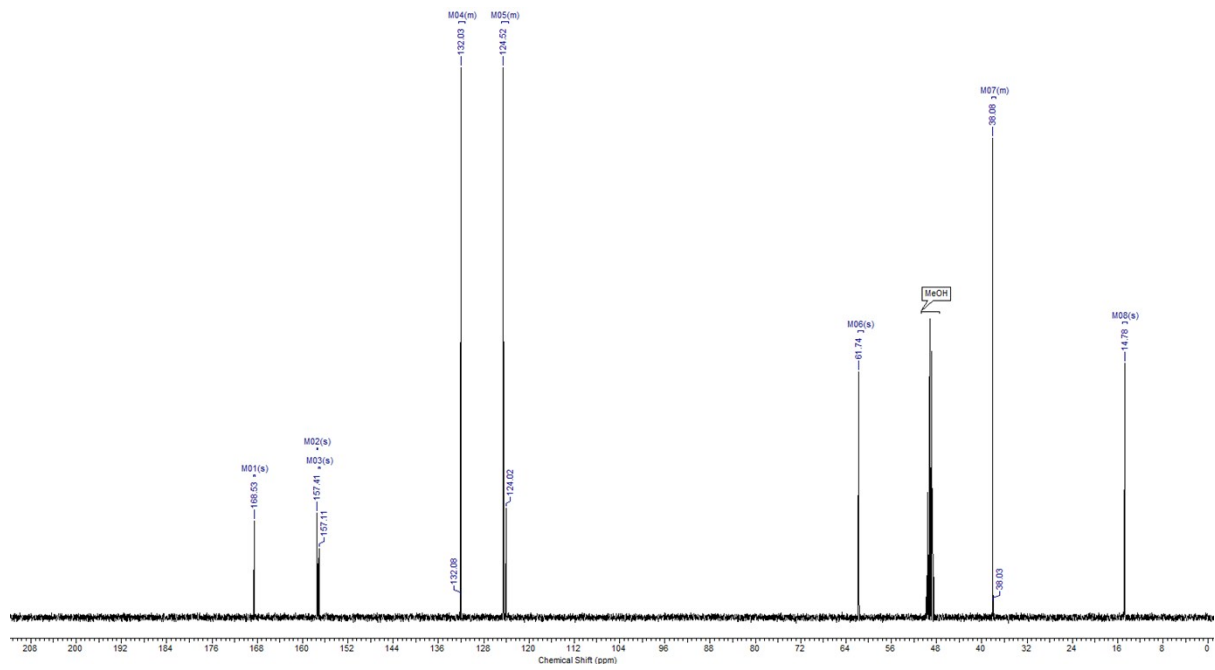

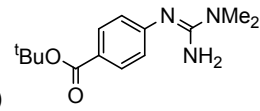

Tert-butyl 3-((amino(dimethylamino)methylene) amino)benzoate (54)

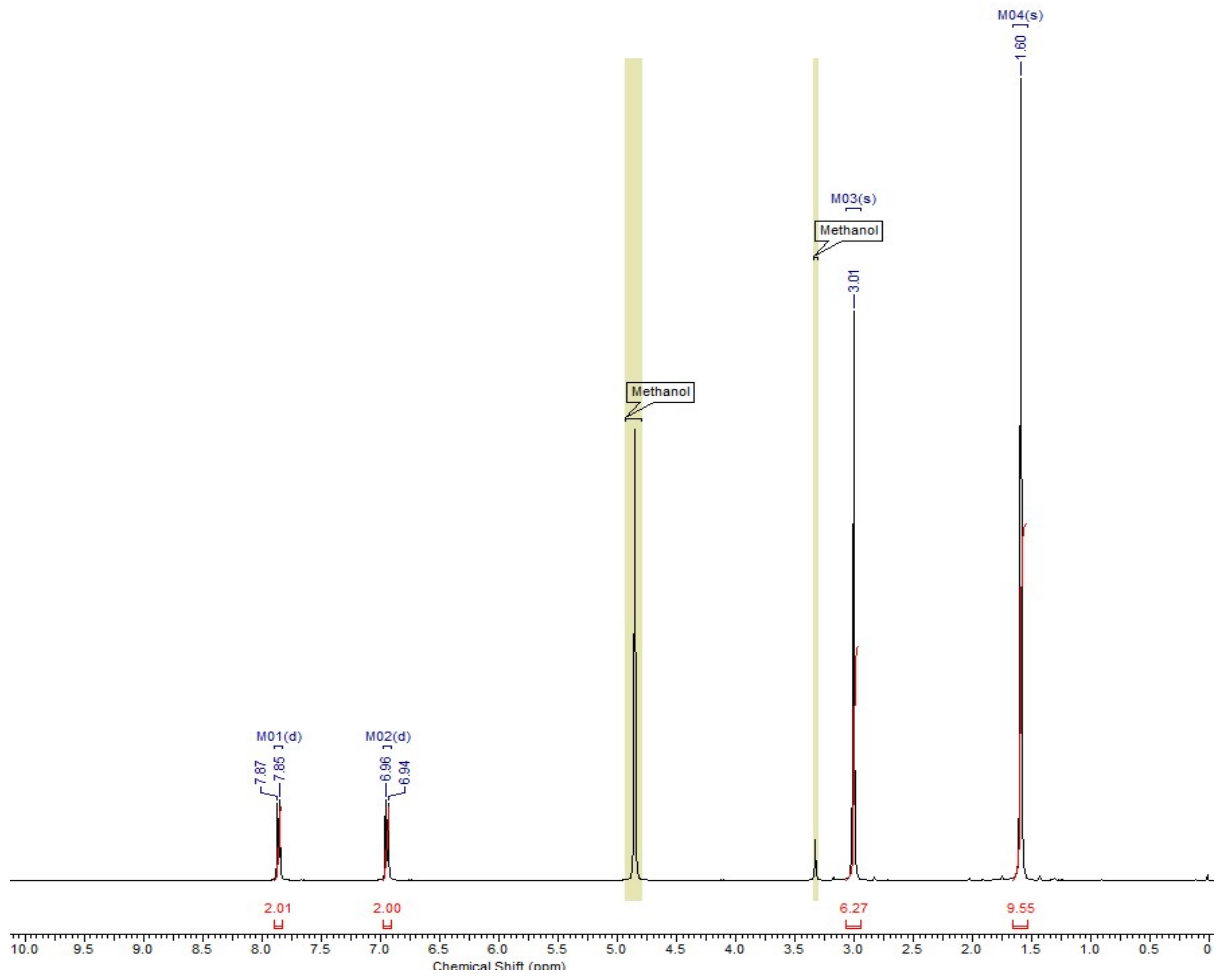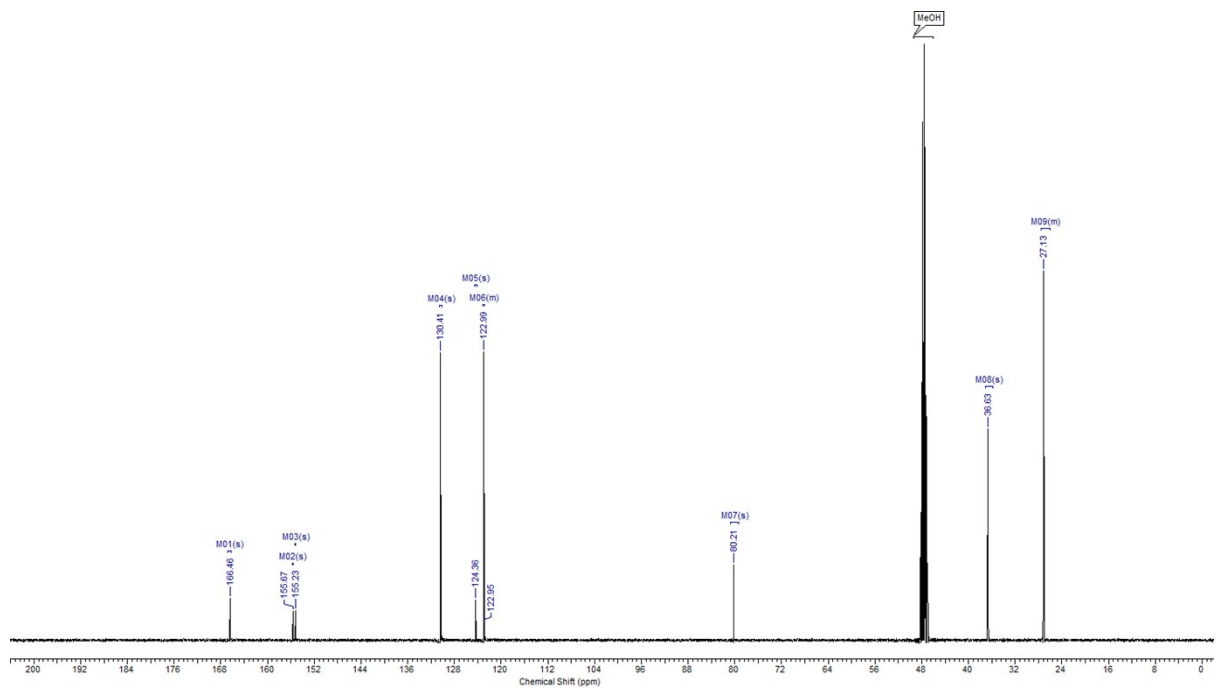

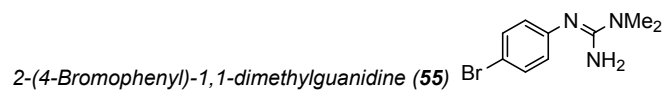

01.1r proton.esp

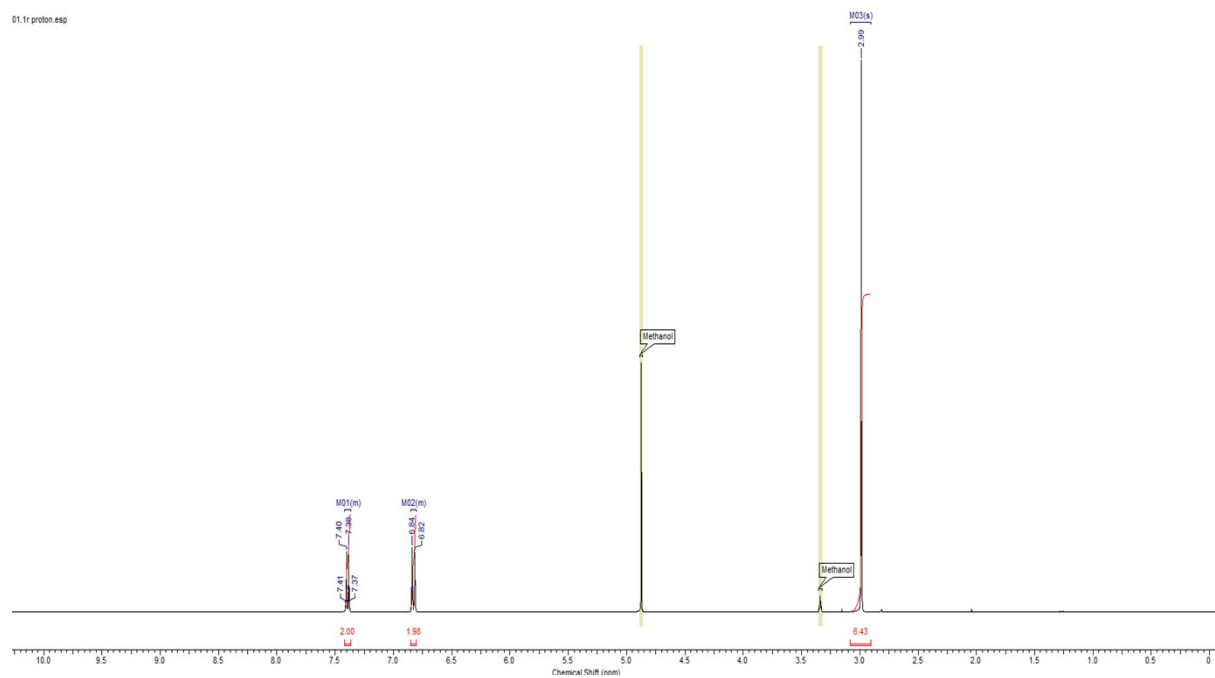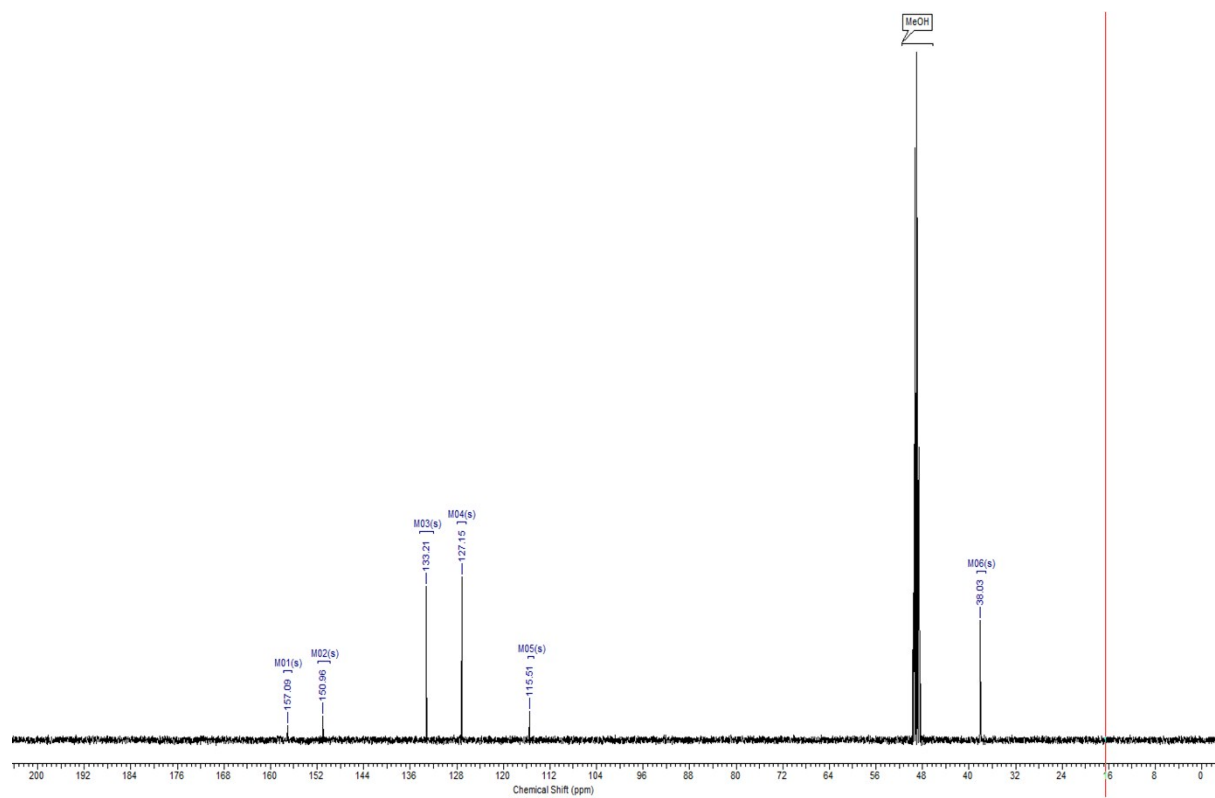

3-(3-Chlorophenyl)-1,1-dimethylguanidine (56)

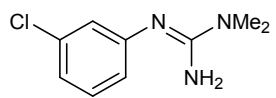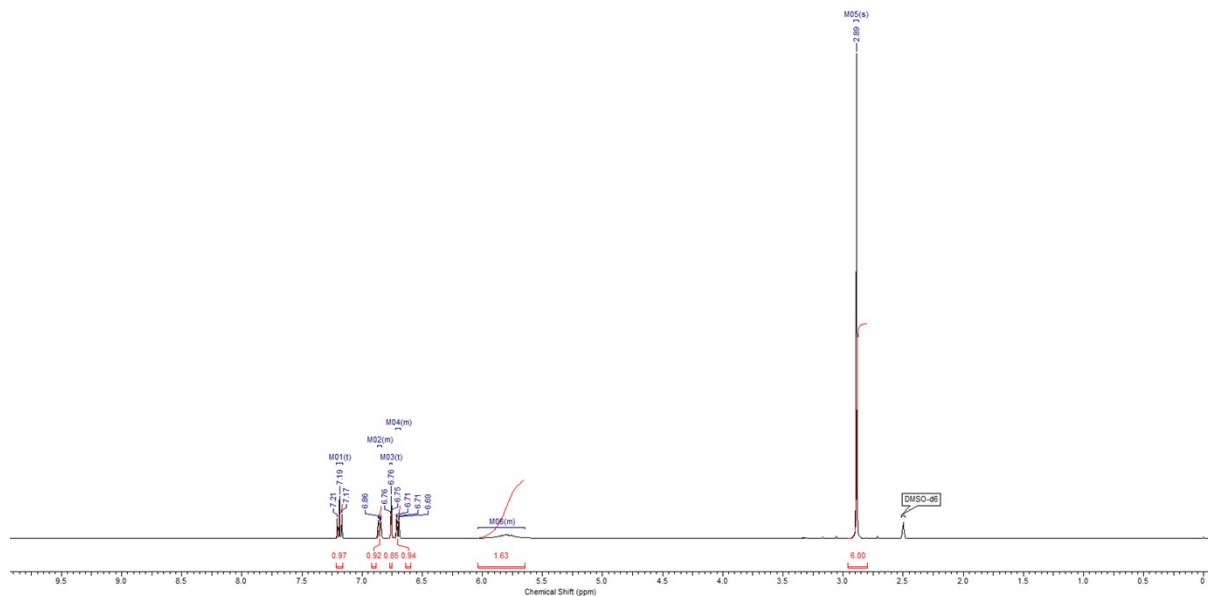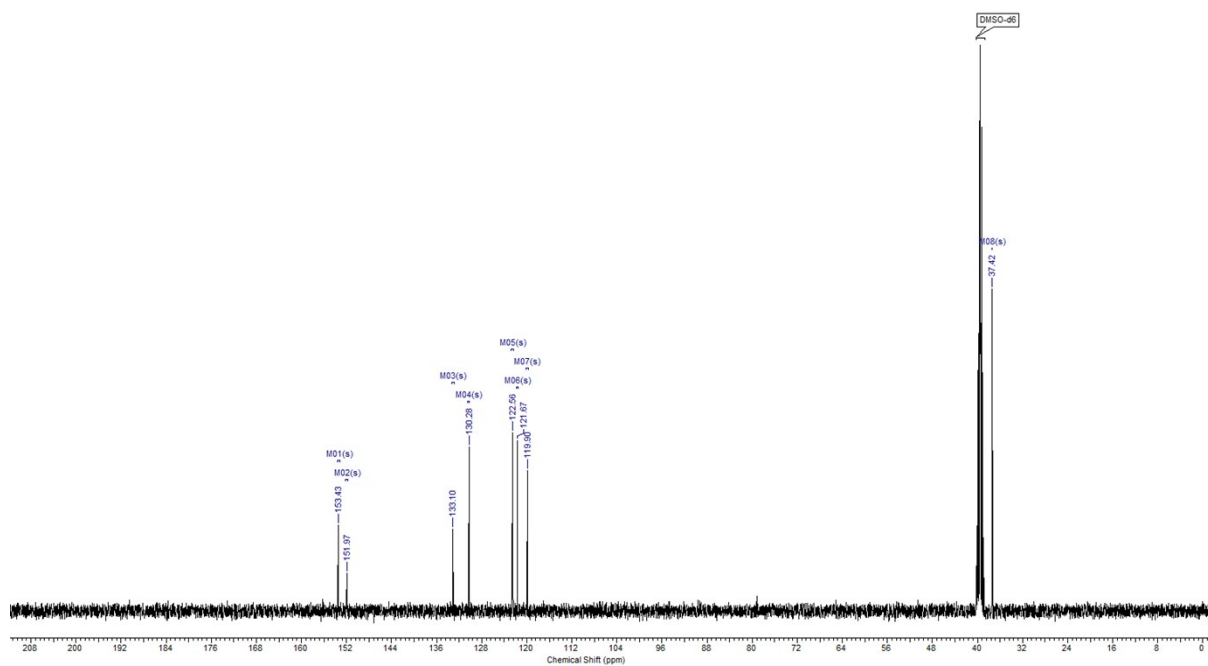

3-(3-Bromophenyl)-1,1-dimethylguanidine (57)

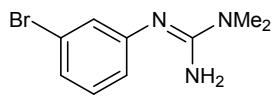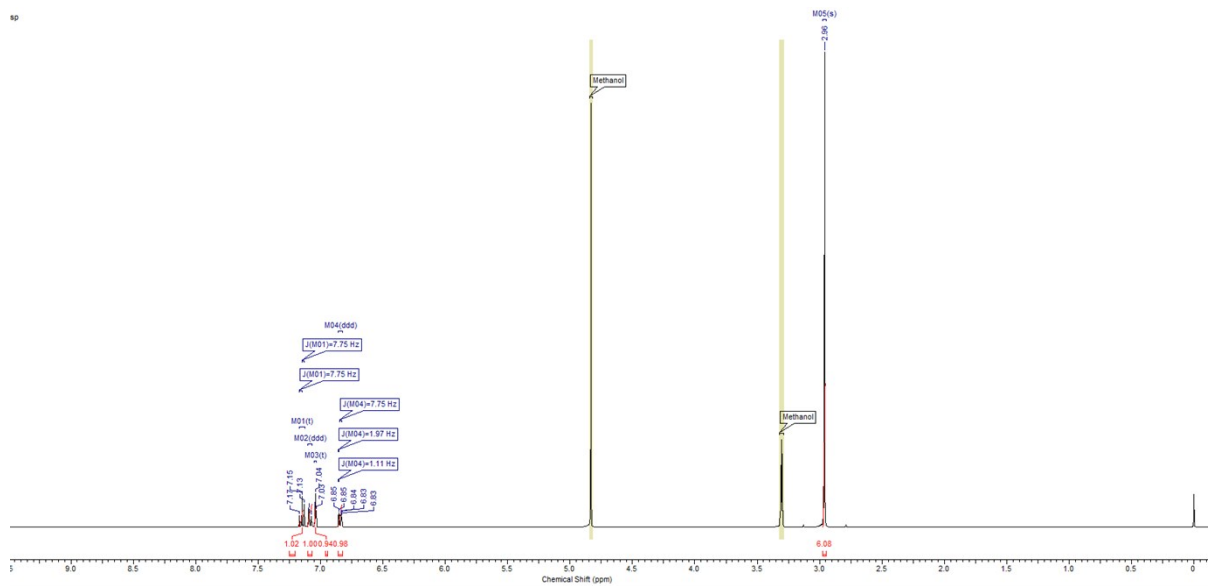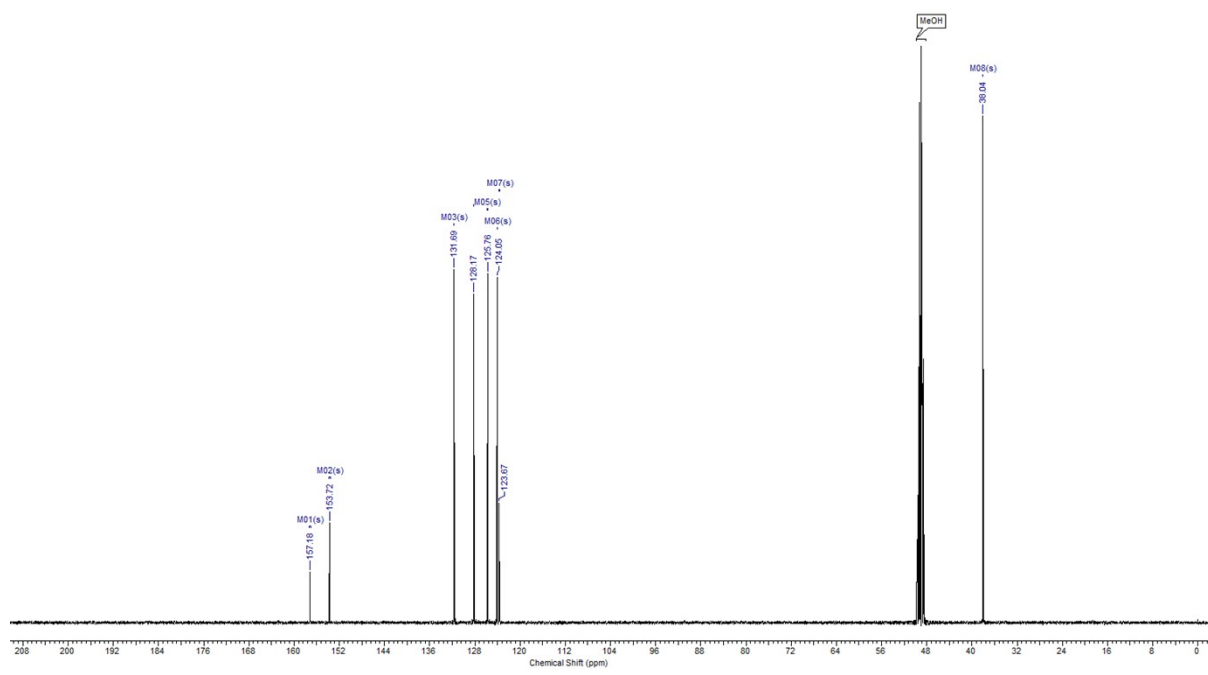



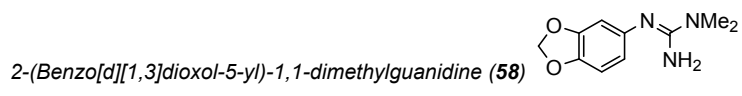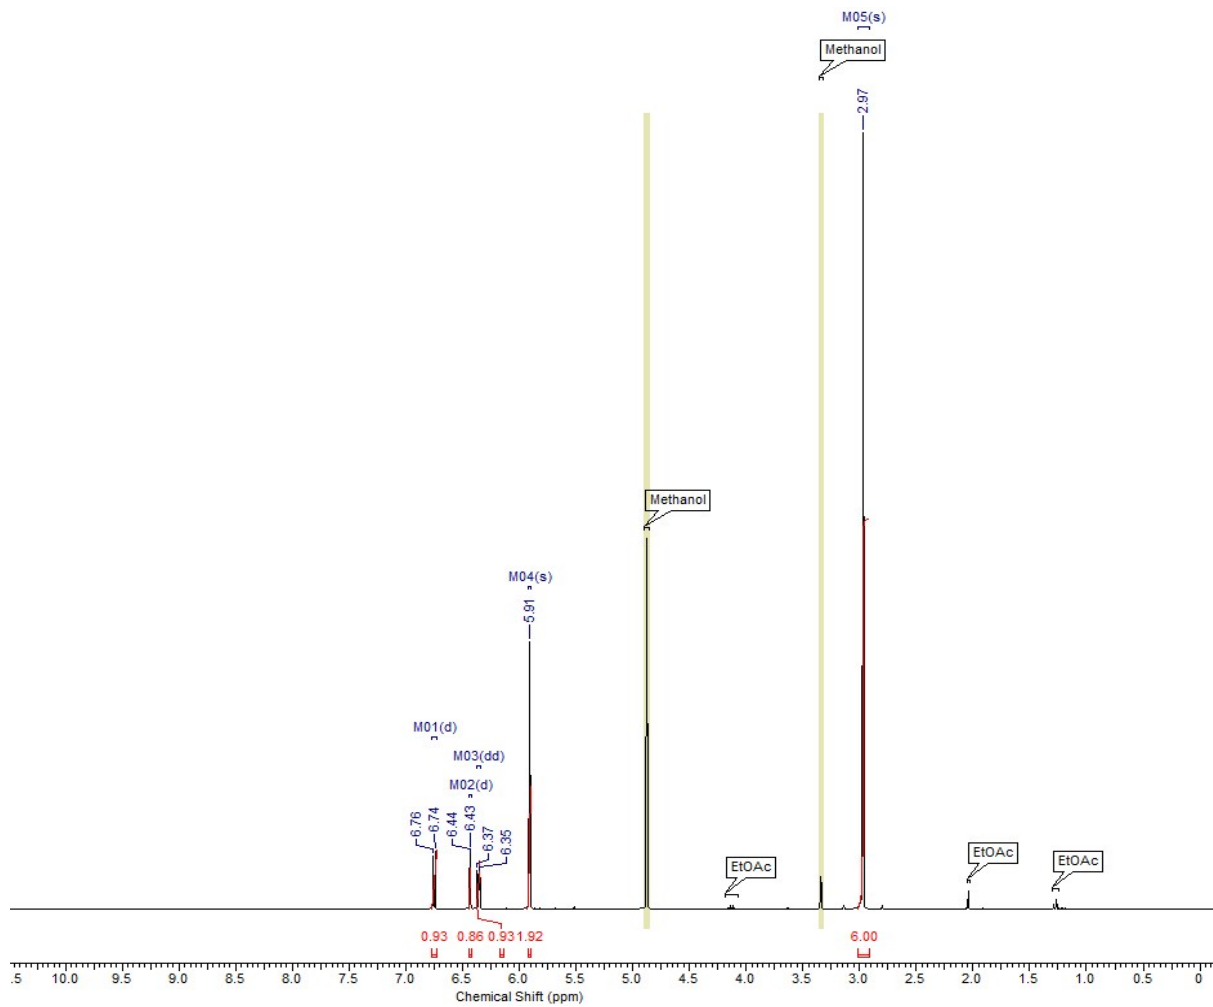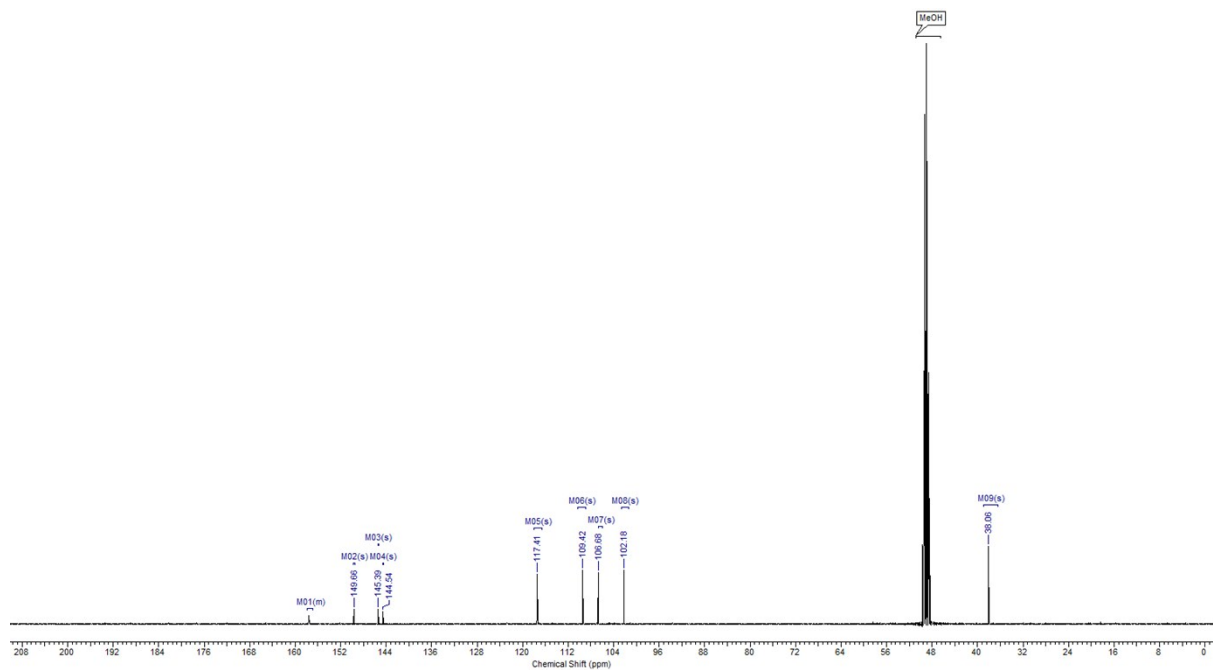

1,1-Diethyl-2-phenylguanidine (59)

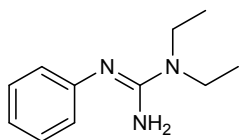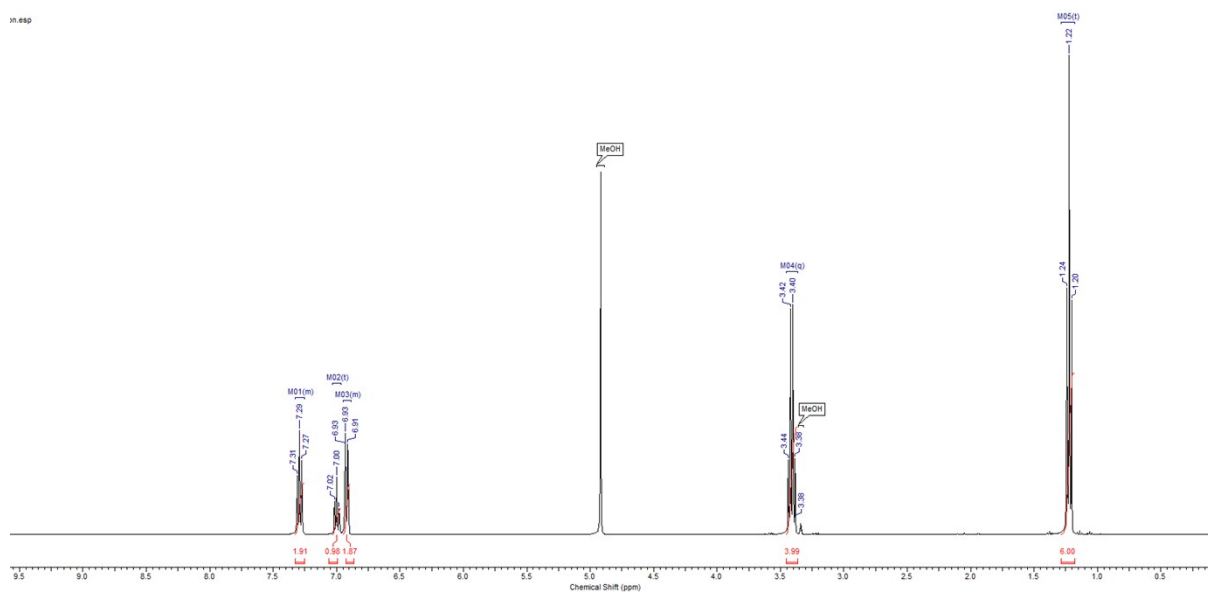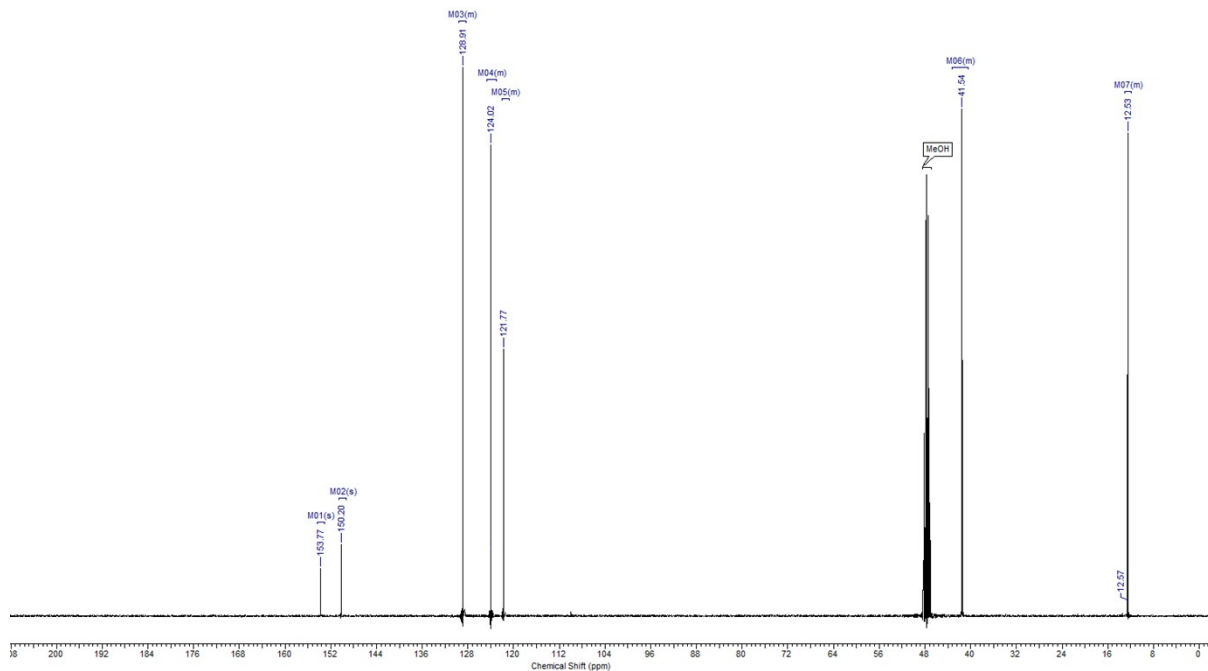

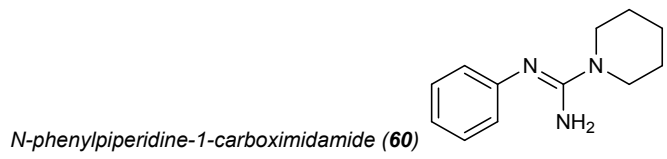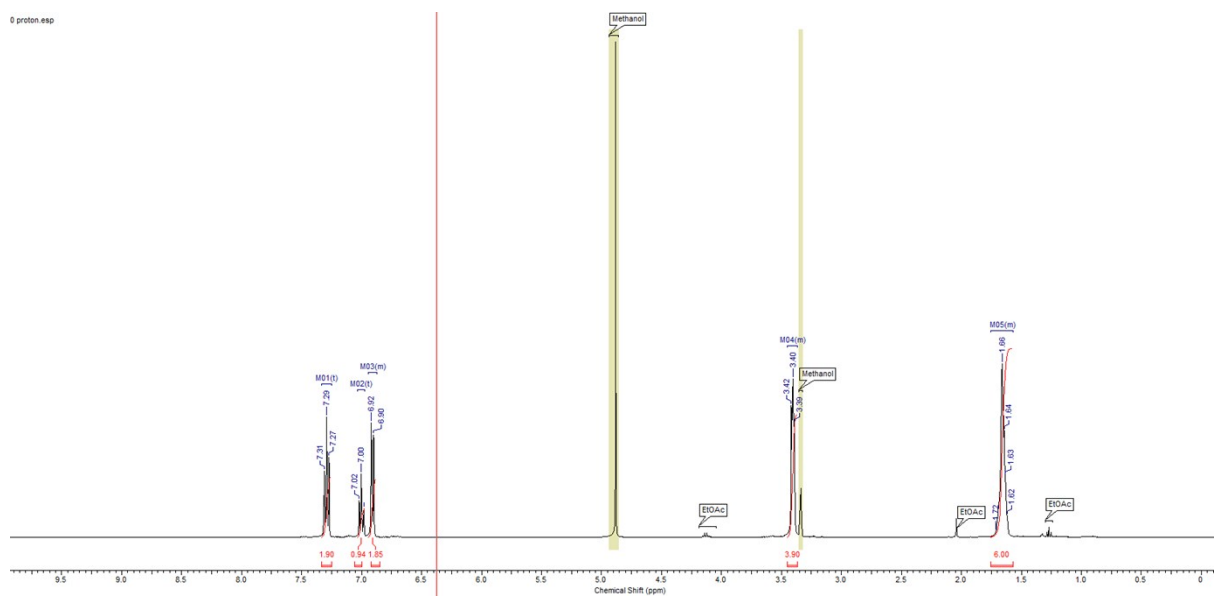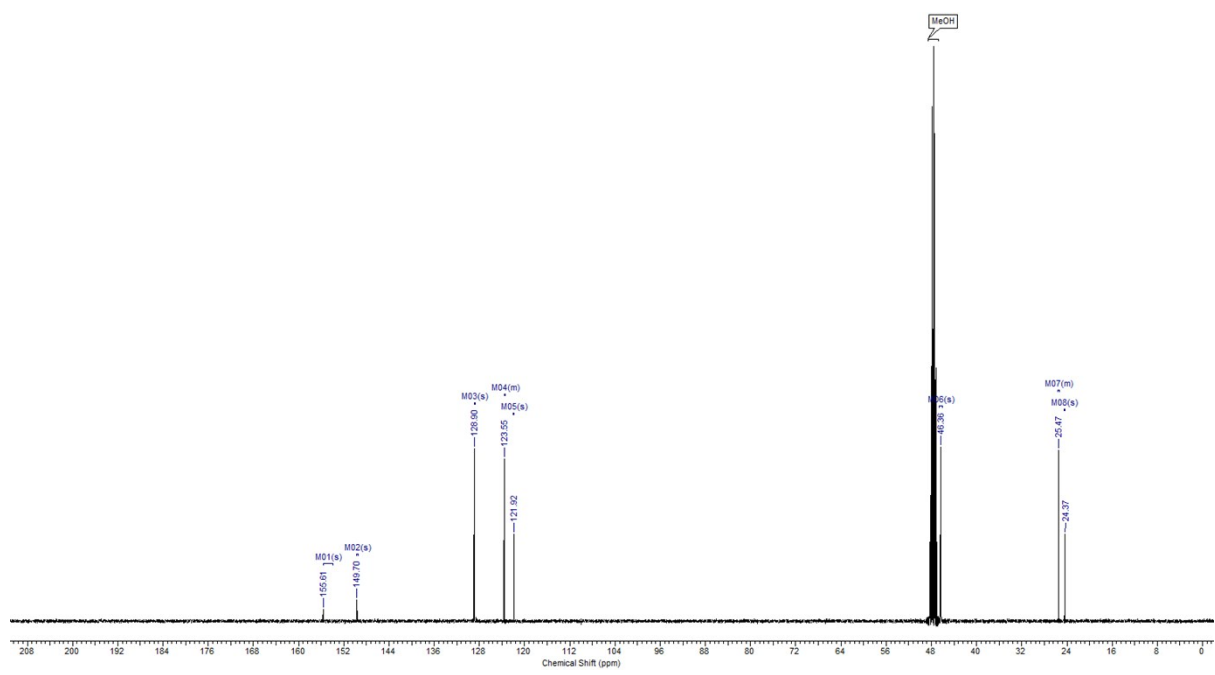

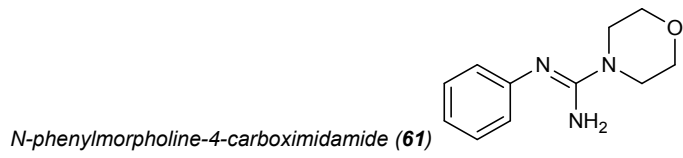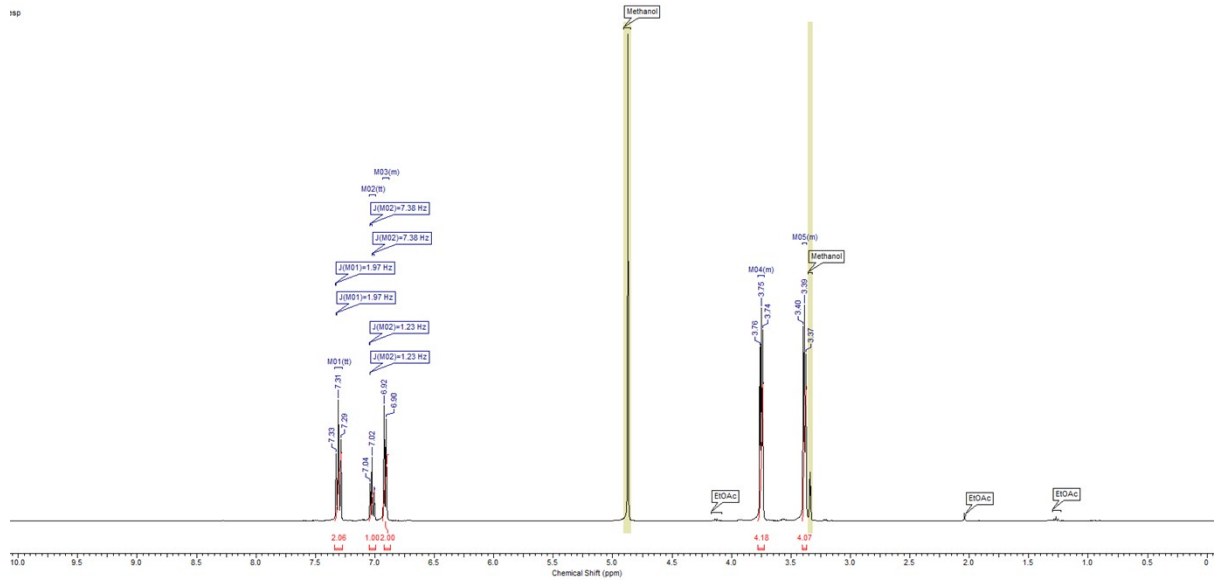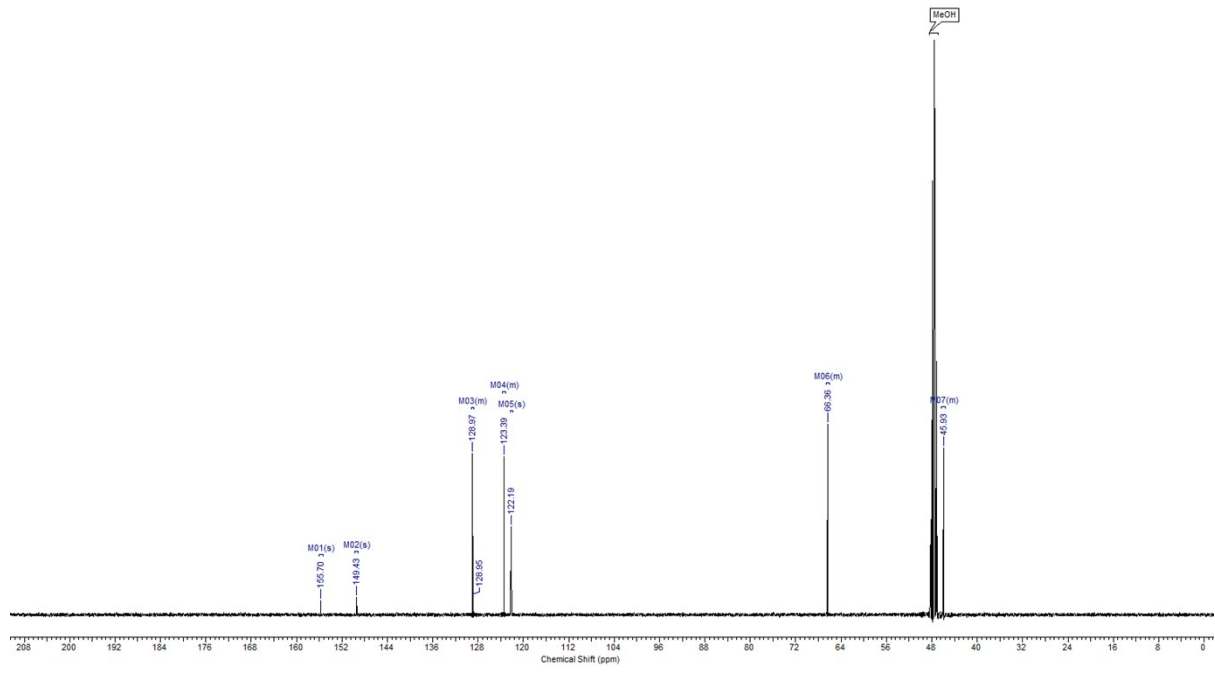

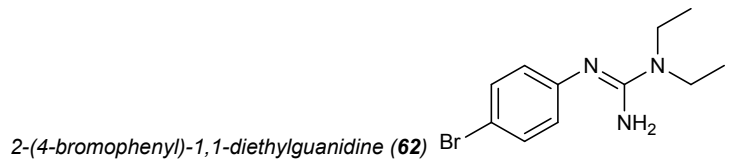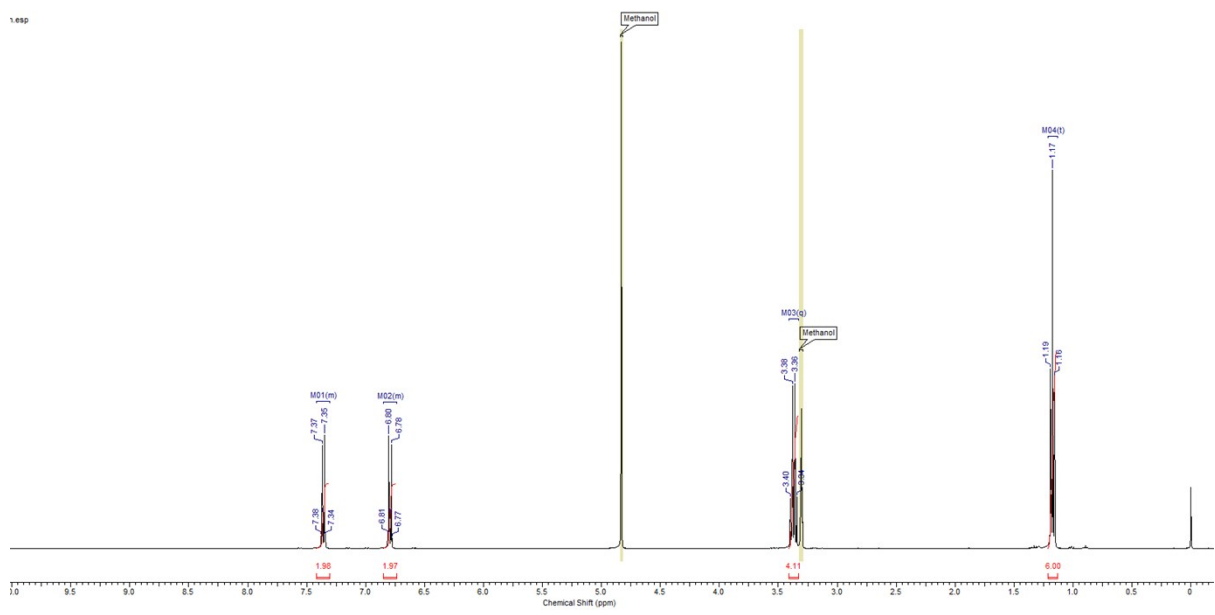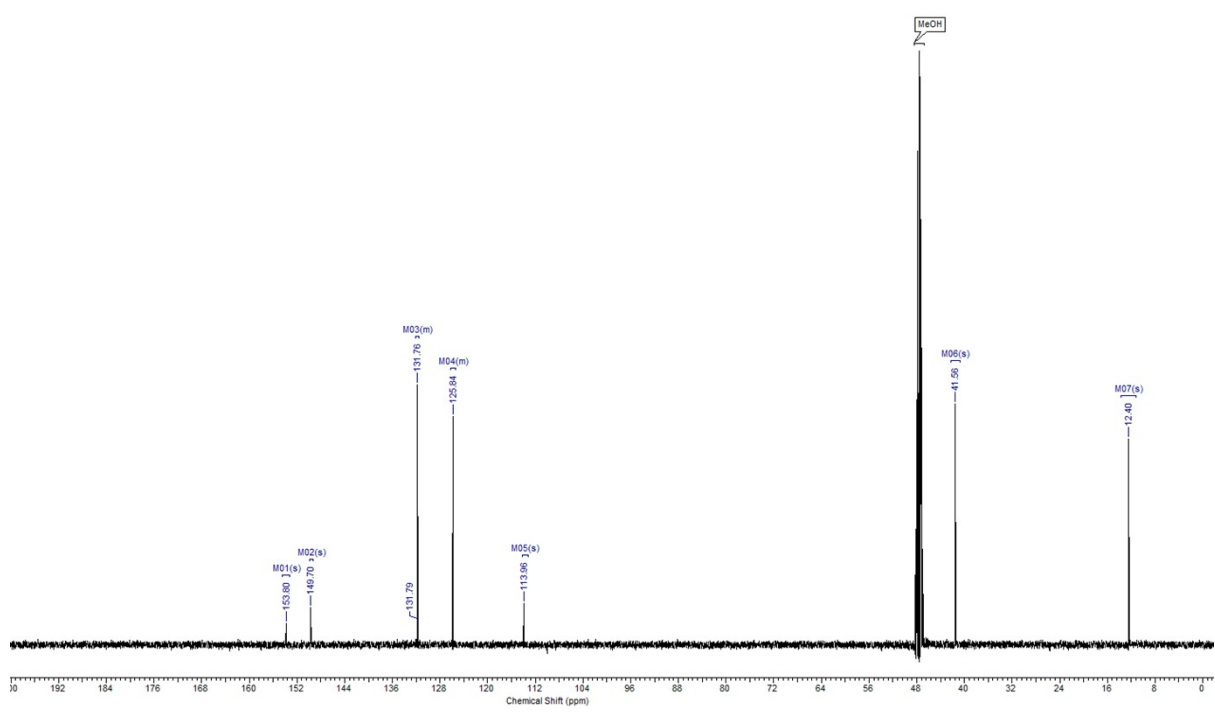

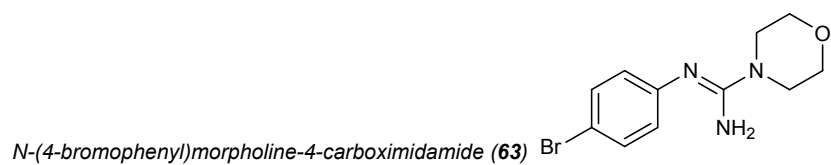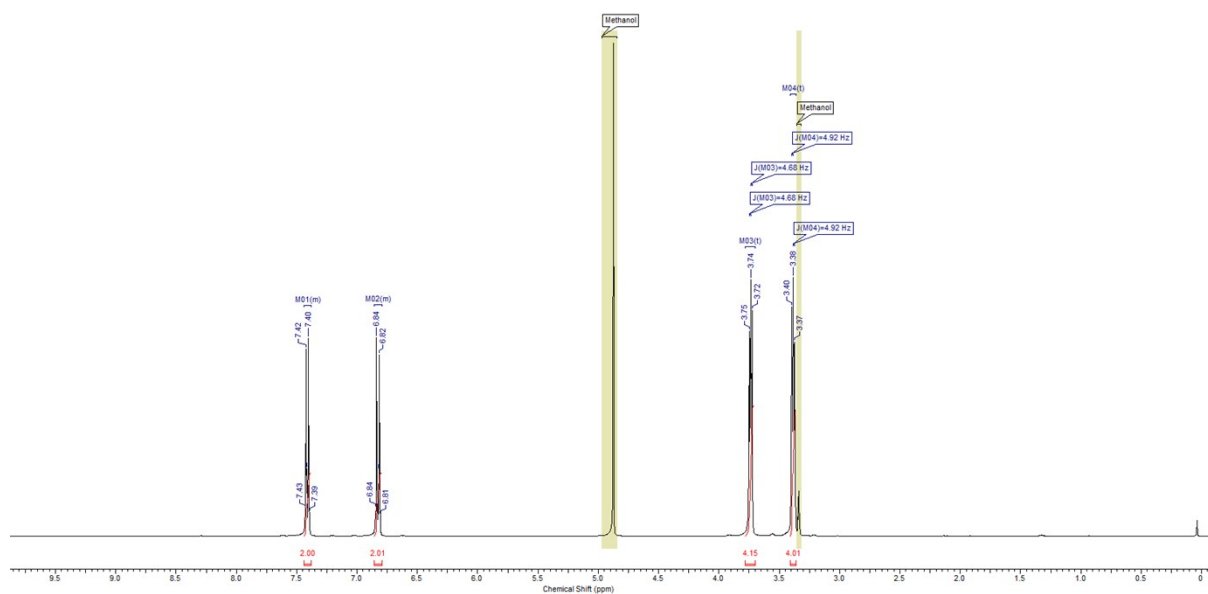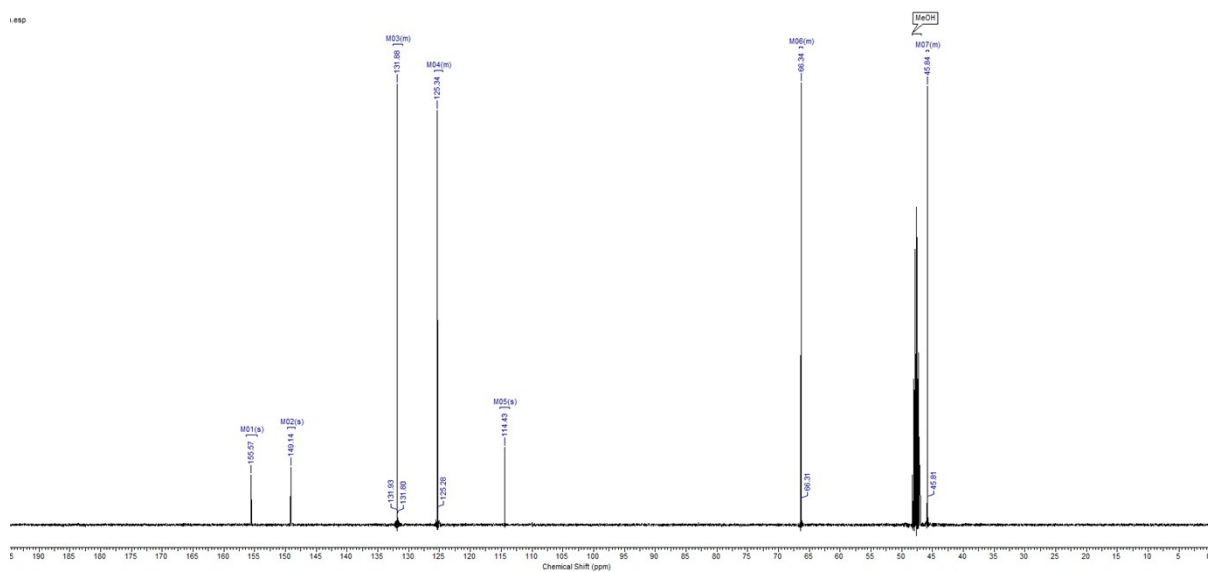

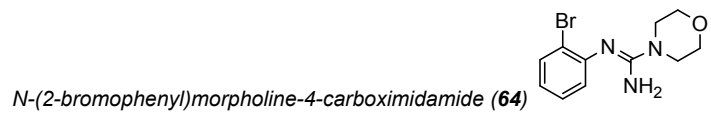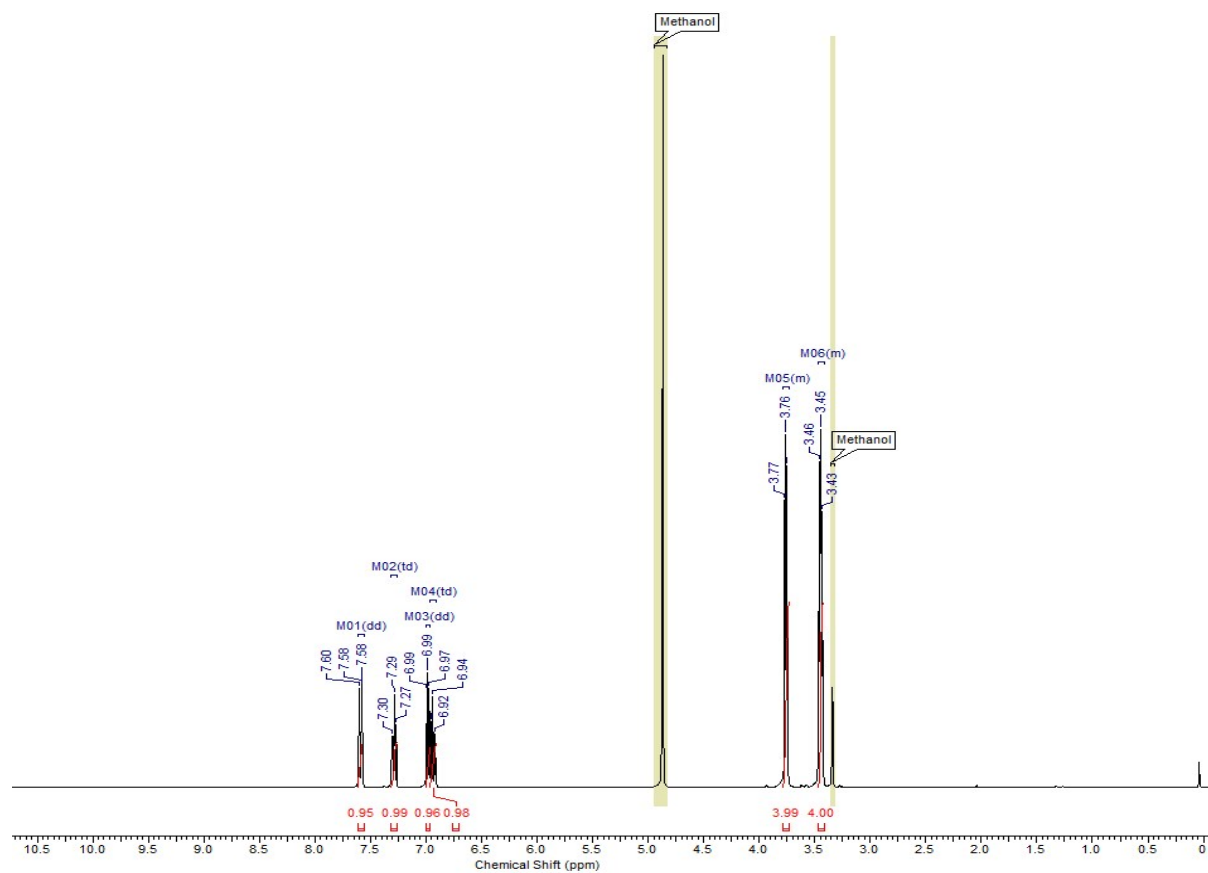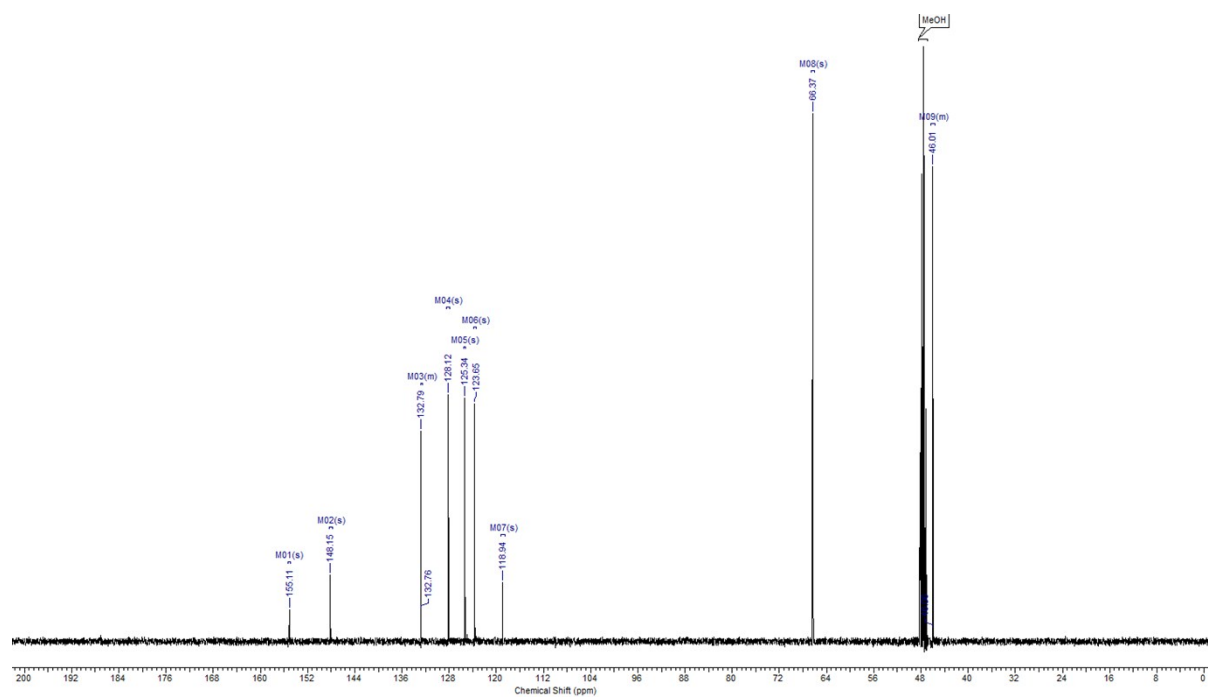

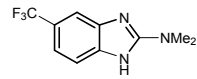

5-Trifluoromethyl-N,N-dimethyl-1Hbenzo[d]imidazol-2-amine (**8**)

001.1r.esp

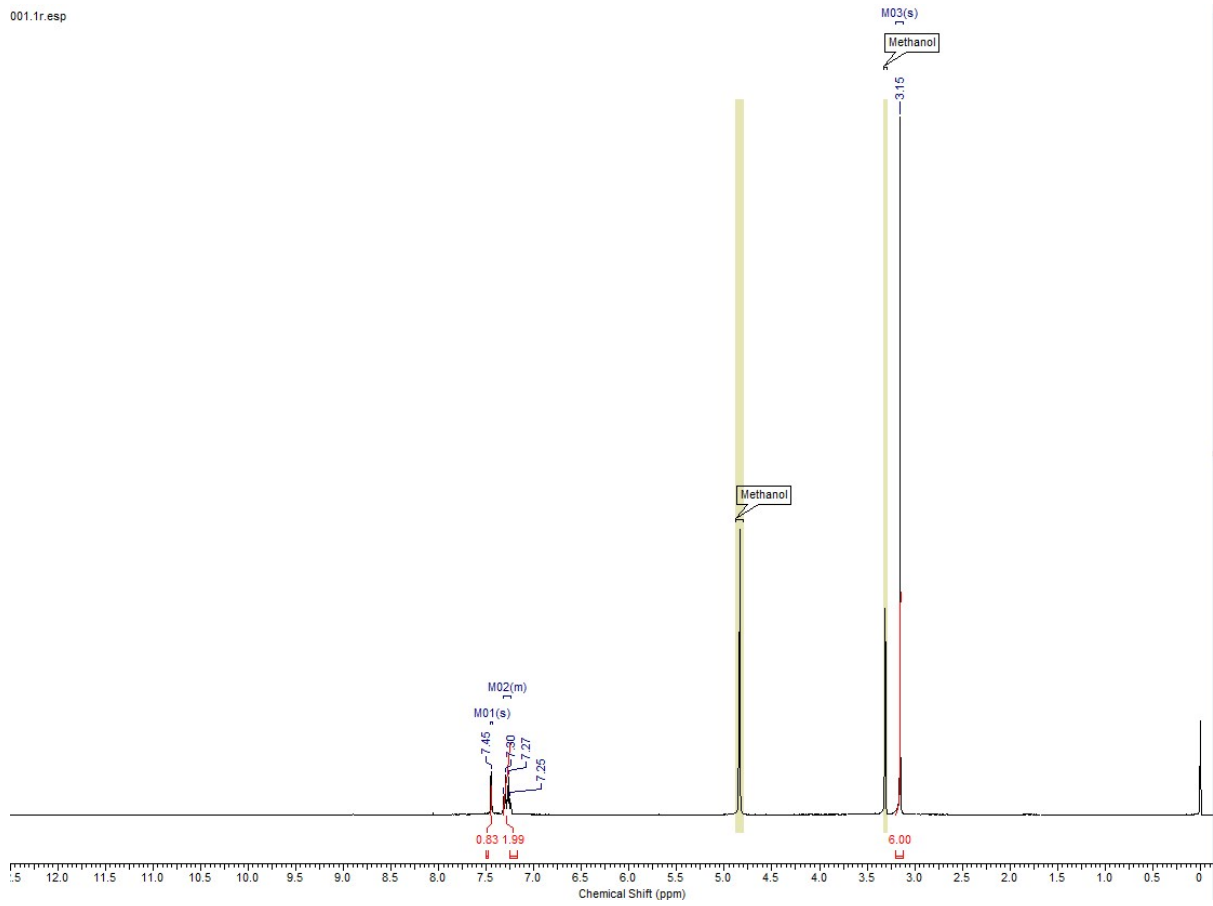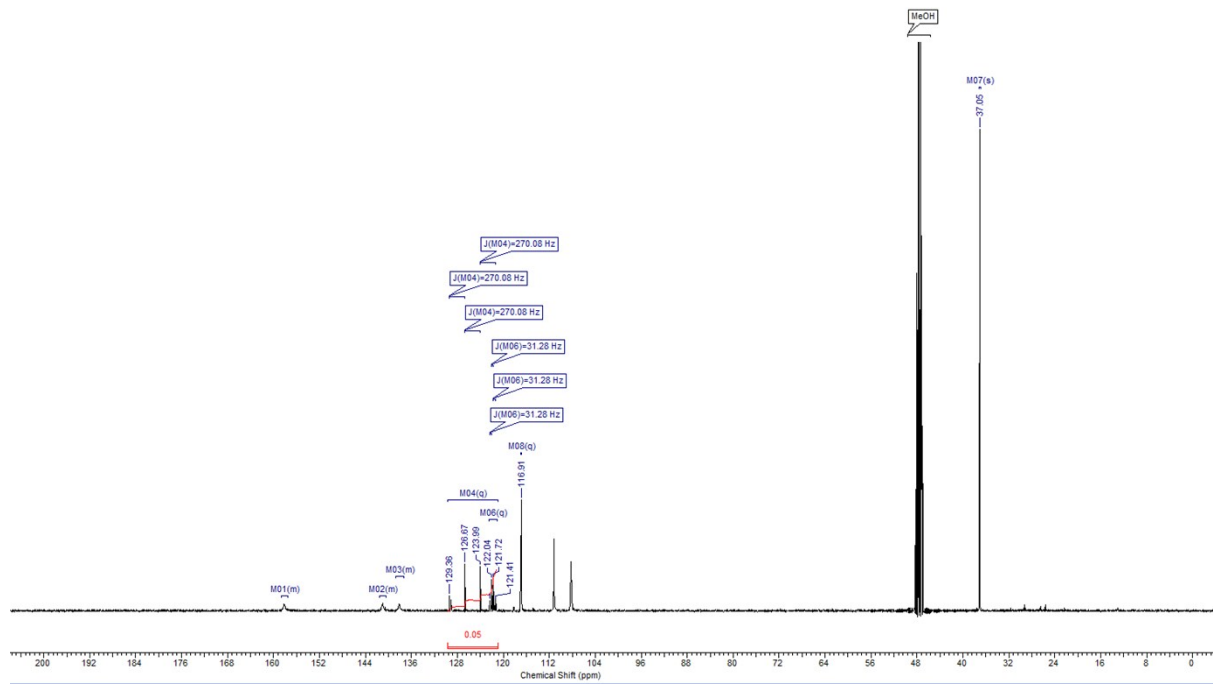



<sup>19</sup>F NMR

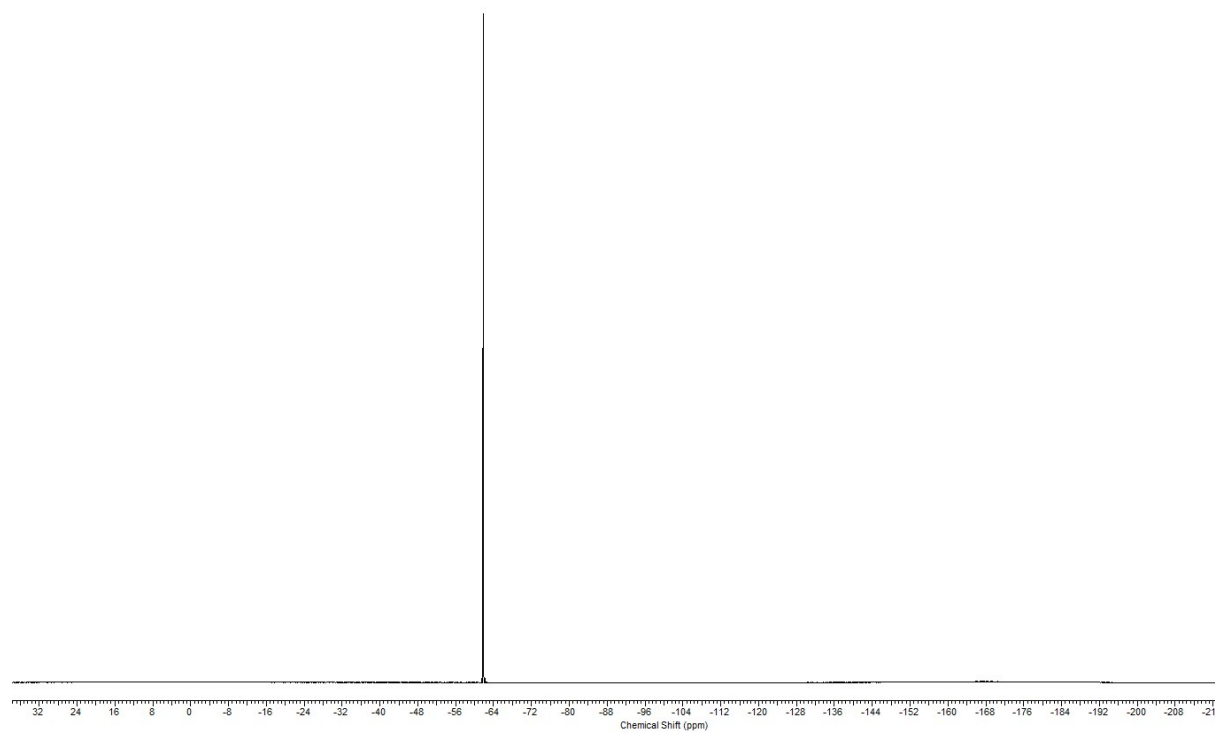

4-fluoro-N,N-dimethyl-1H-benzo[d]imidazol-2-amine (9)

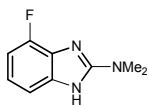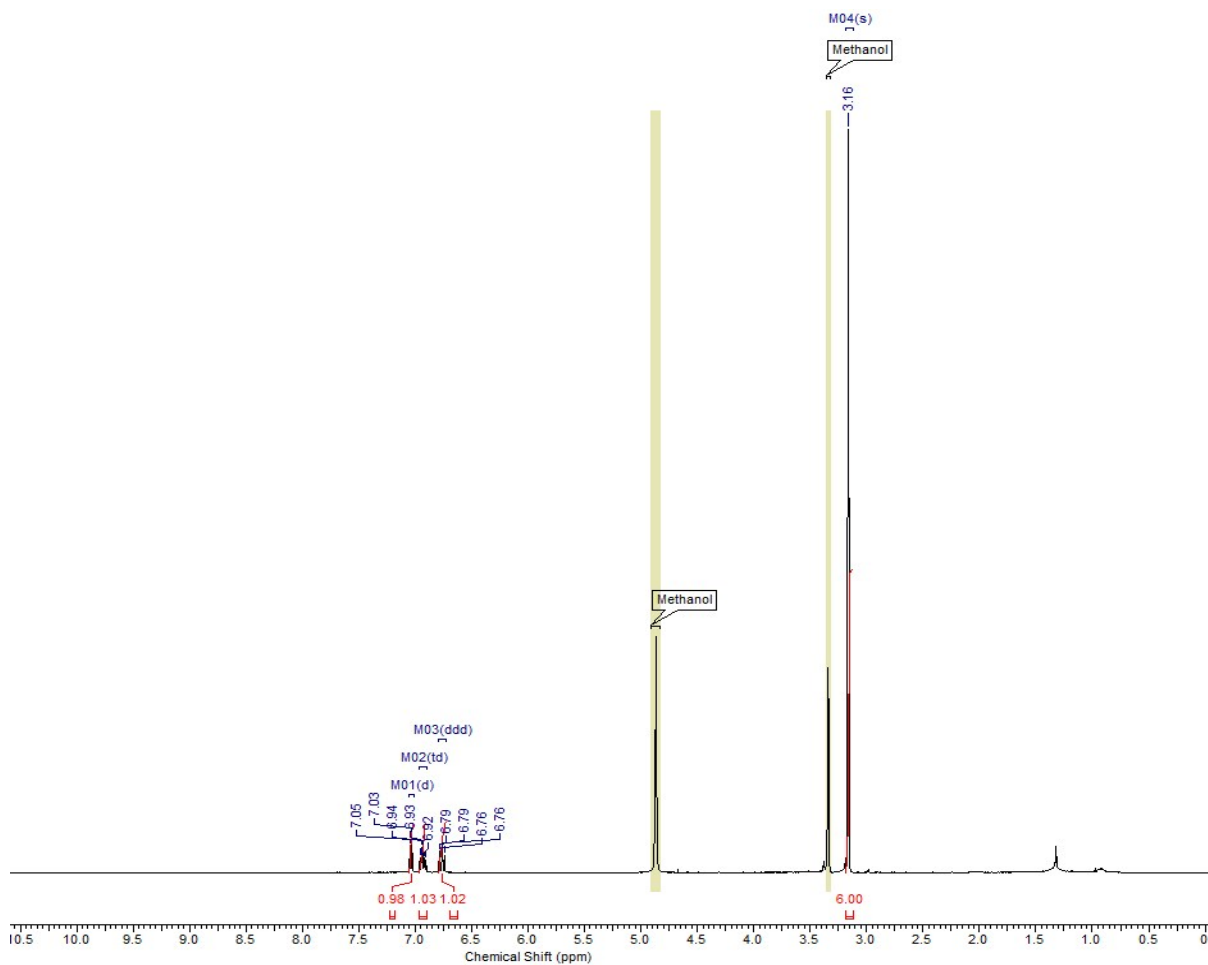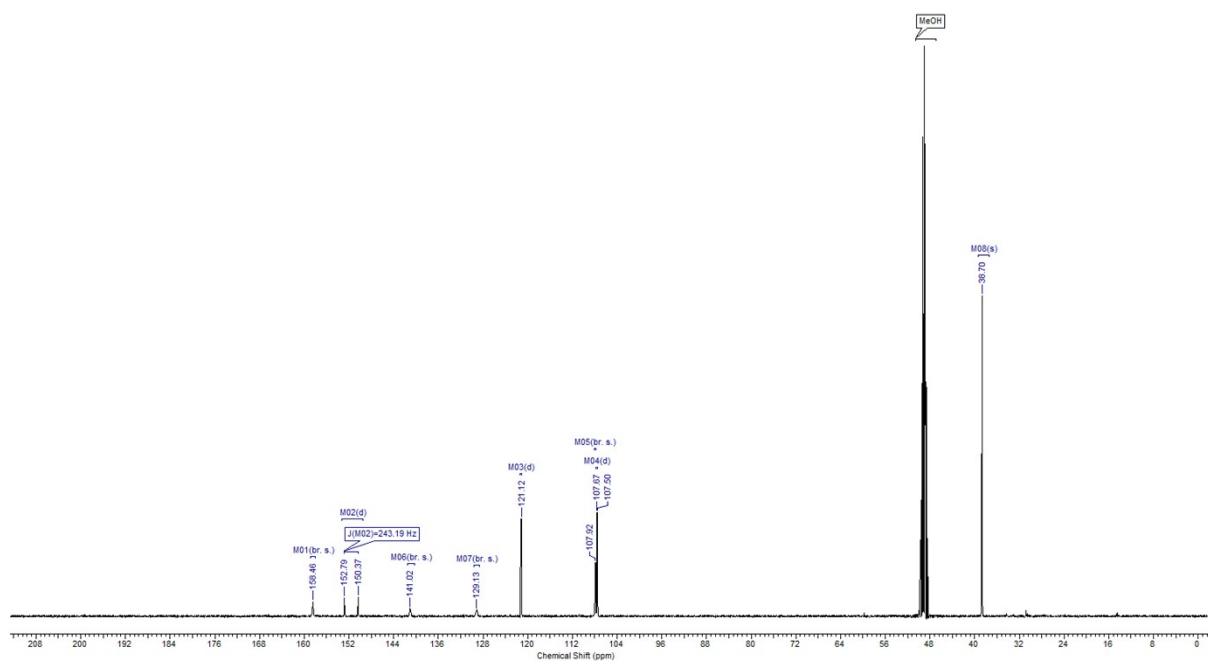

$^{19}\text{F}$  NMR

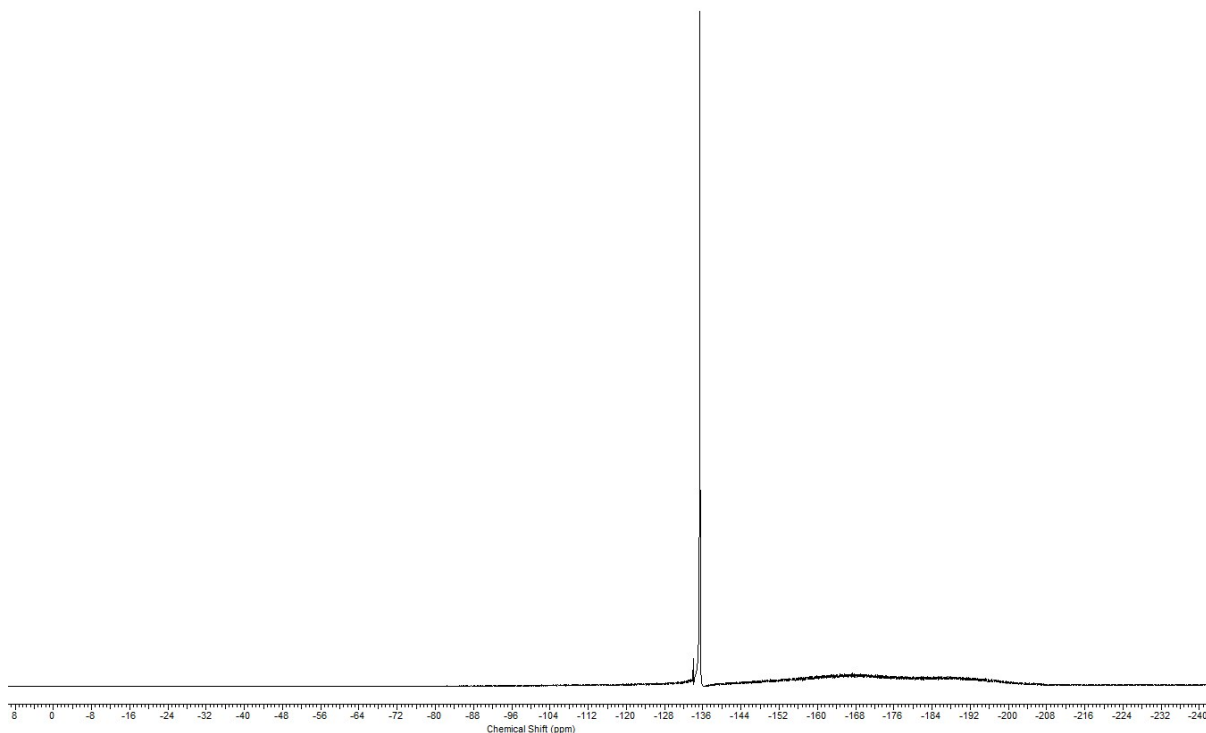

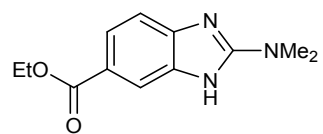

Ethyl 2-(dimethylamino)-1H-benzo[d]imidazole-6-carboxylate (11)

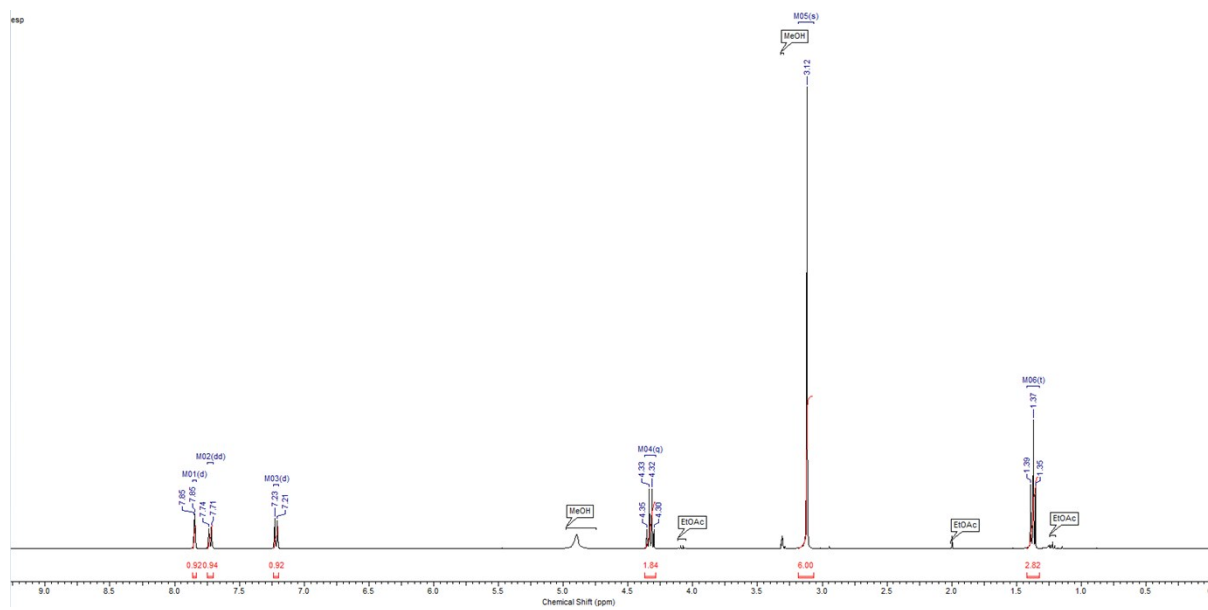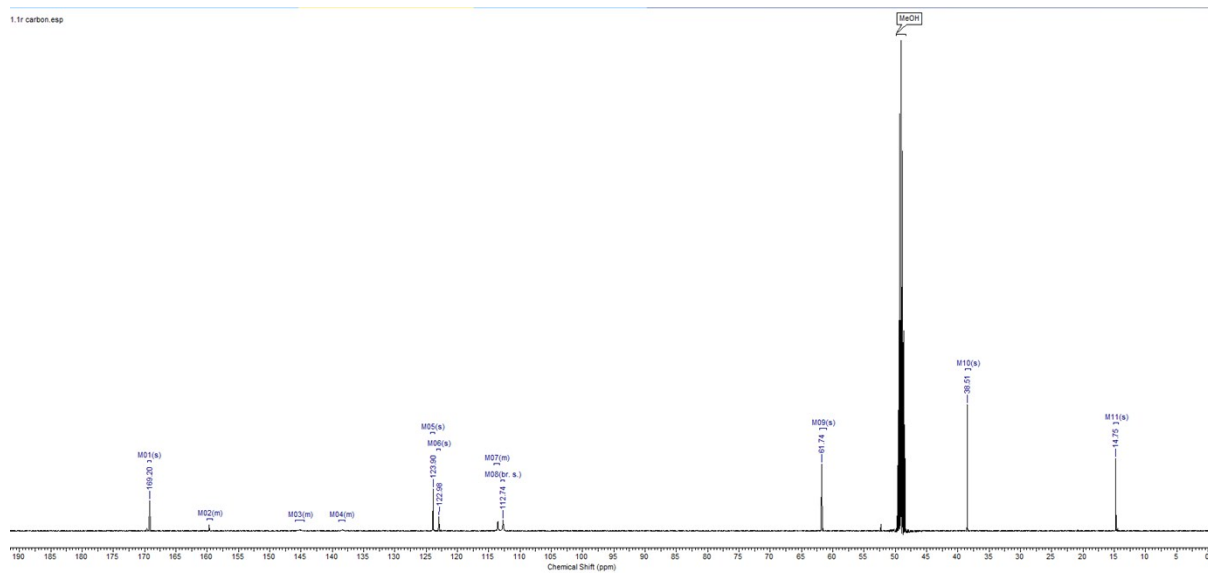

Tert-butyl 2-(dimethylamino)-1H-benzo[d]-imidazole-5-carboxylate (**12**)

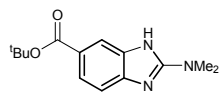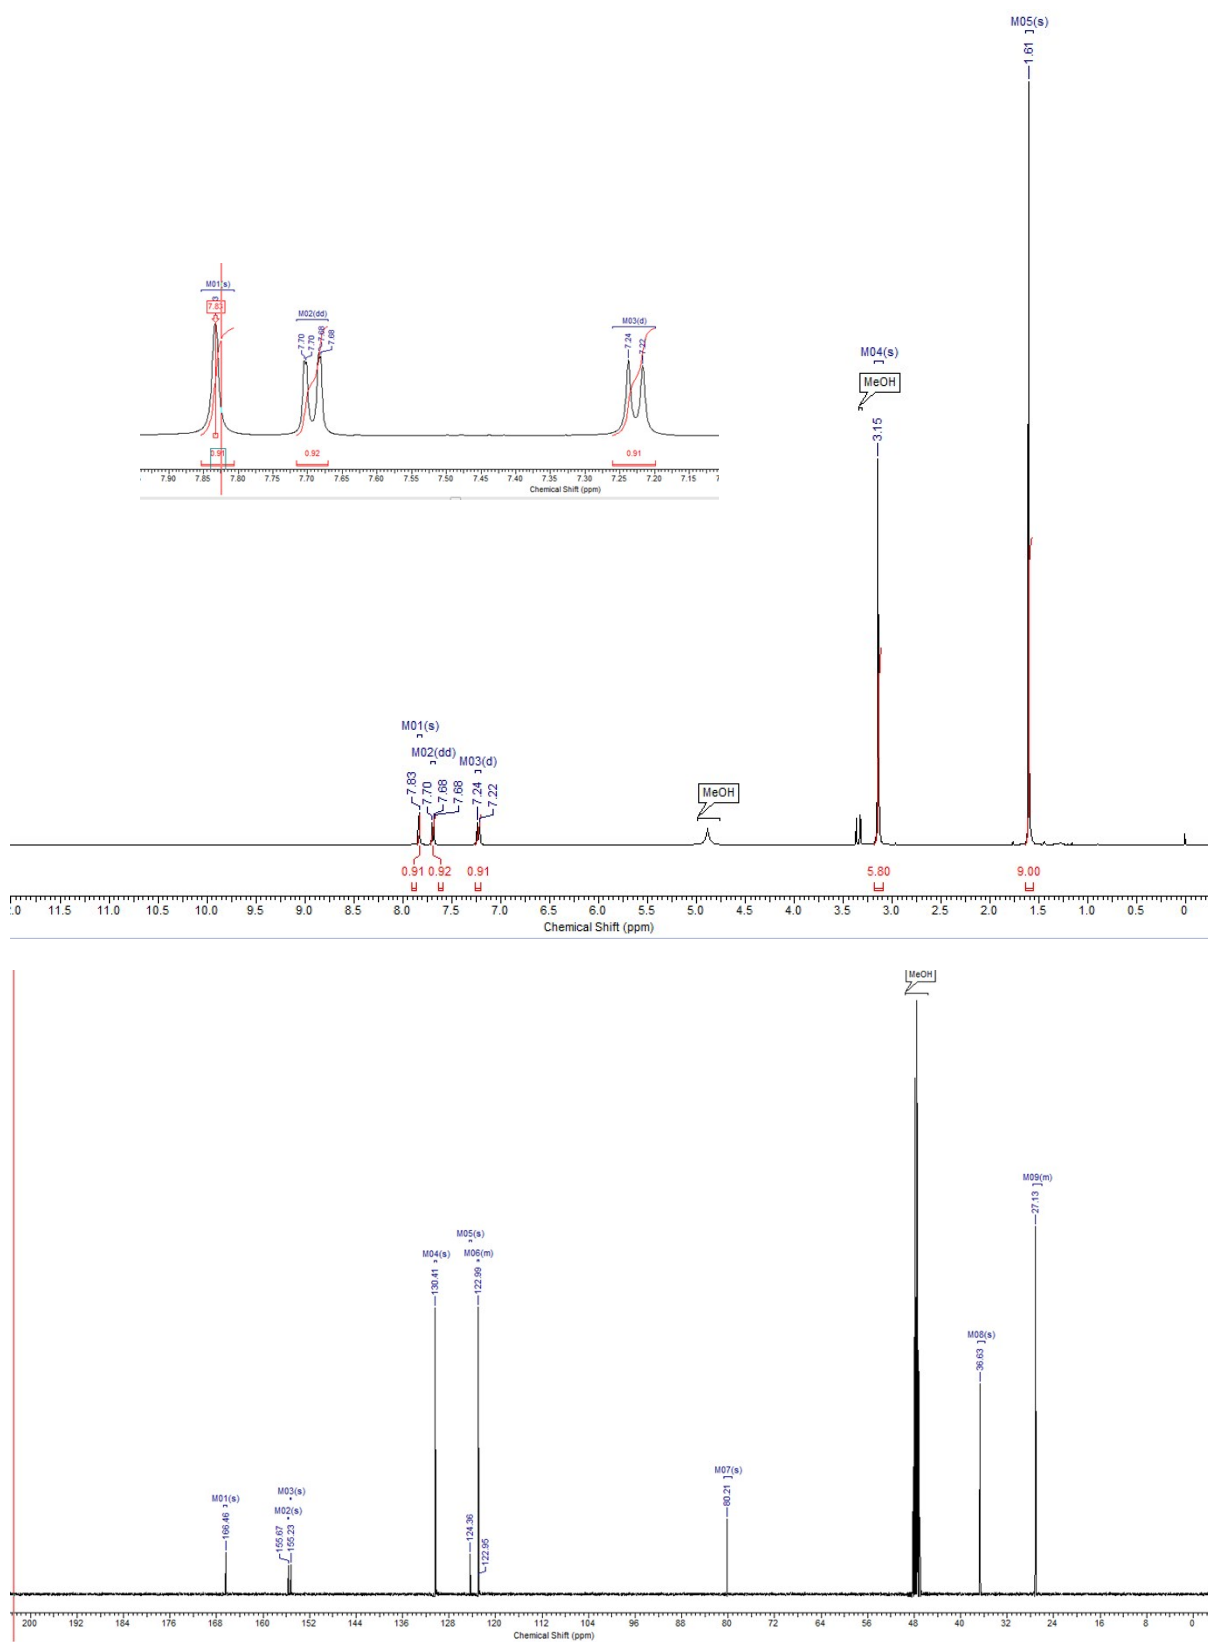

4-chloro-*N,N*-dimethyl-1*H*-benzo[*d*]imidazol-2-amine (16)

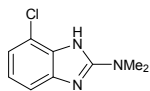

77-12-(3-7) 1H.esp

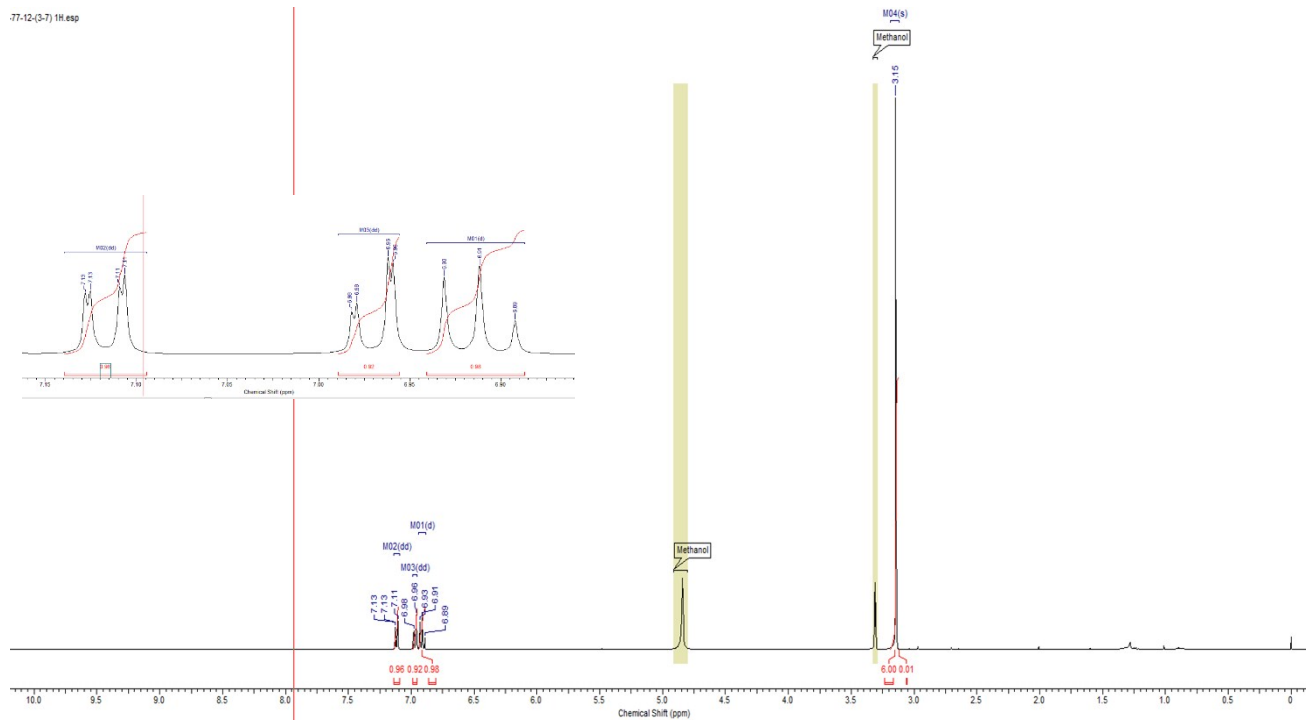

```

Current Data Parameters
NAME 881094-77-12-(3-7)
EXPNO 2
PROCNO 1
F2 - Acquisition Parameters
Date_ 20170803
Time 4.00
INSTRUM spect
PROBHD 5 mm HLRBBO-501
PULPROG zgpg30
SI 32748
SOLVENT metd
NS 4094
DS 4
SWH 25000.000 Hz
FIDRES 0.762333 Hz
AQ 0.6334100 sec
RG 378
SM 20.000 usec
TE 300.2 K
NUC1 13C
NUC2 13C
P1 1.0000000 sec
SFO1 400.2530010 MHz
TD 1
===== CHANNEL f1 =====
NUC1 13C
P1 1.00 usec
SFO1 55.0000000 MHz
===== CHANNEL f2 =====
CPROG2 waltz16
NUC1 13C
NUC2 13C
P1 10.0000000 usec
SFO1 100.6200000 MHz
SFO2 0.25877890 MHz
SFO3 400.2530010 MHz
F2 - Processing parameters
SI 32748
SF 100.6200000 MHz
WDW EM
SSB 0
LB 1.00 Hz
GB 0
PC 1.40
    
```

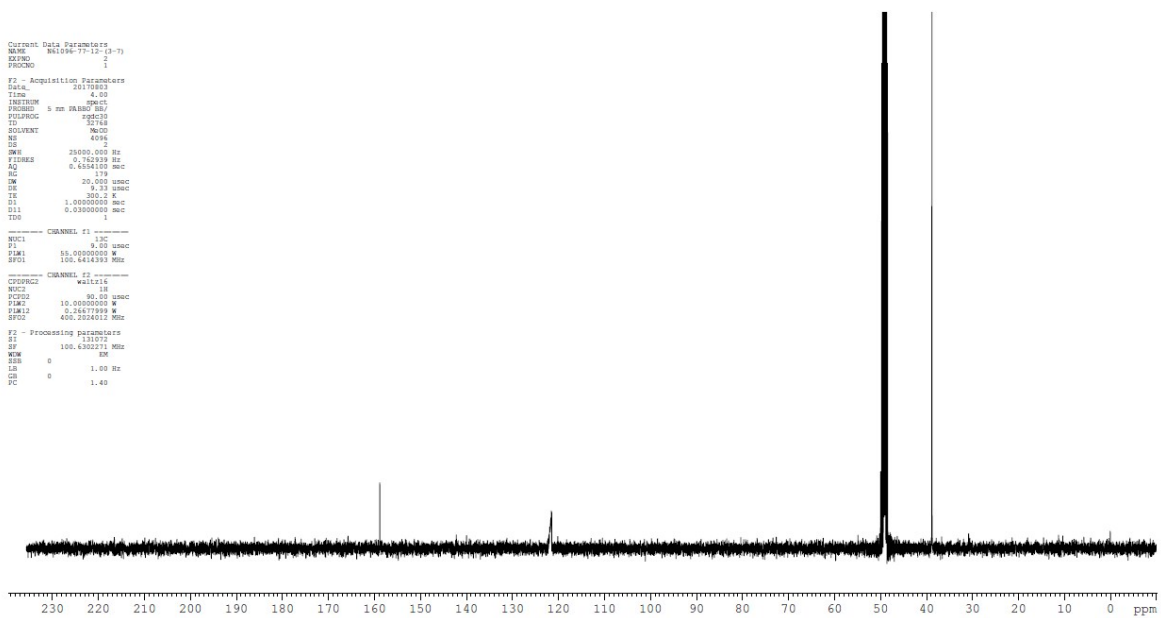

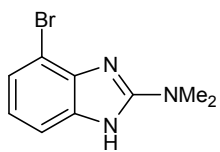

4-Bromo-*N,N*-dimethyl-1*H*-benzo[d]imidazol-2-amine (**18**)

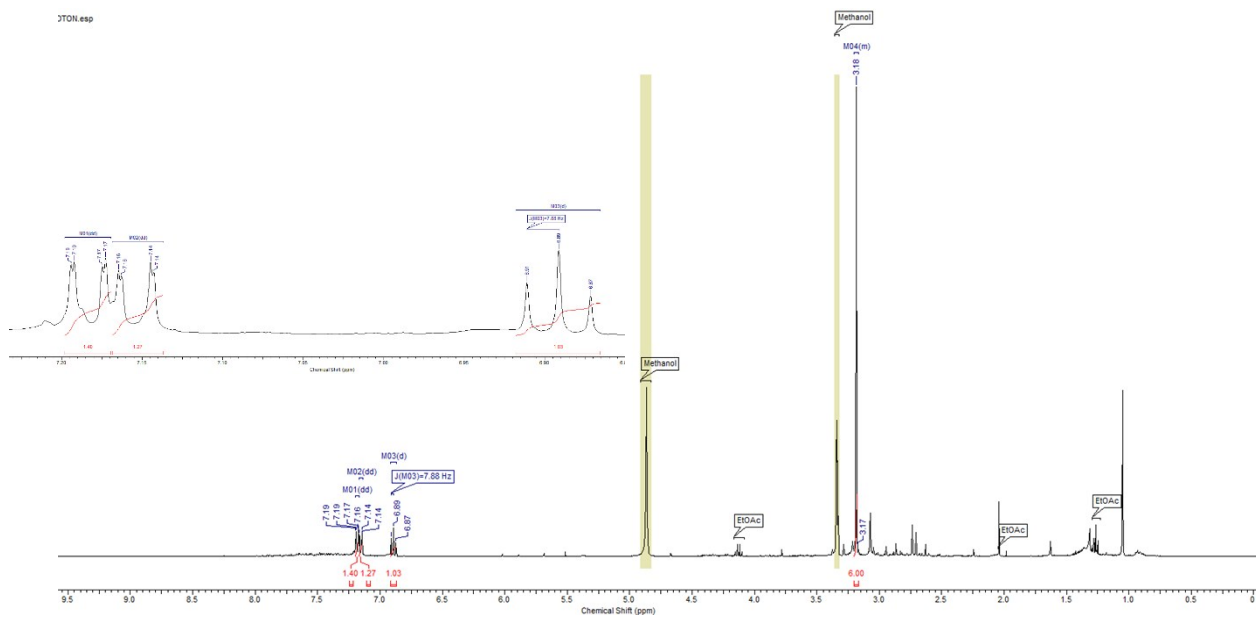

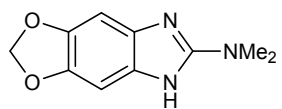

*N,N*-dimethyl-5*H*-[1,3]dioxolo[4',5':4,5]benzo[1,2-*d*]imidazol-6-amine (**19**)

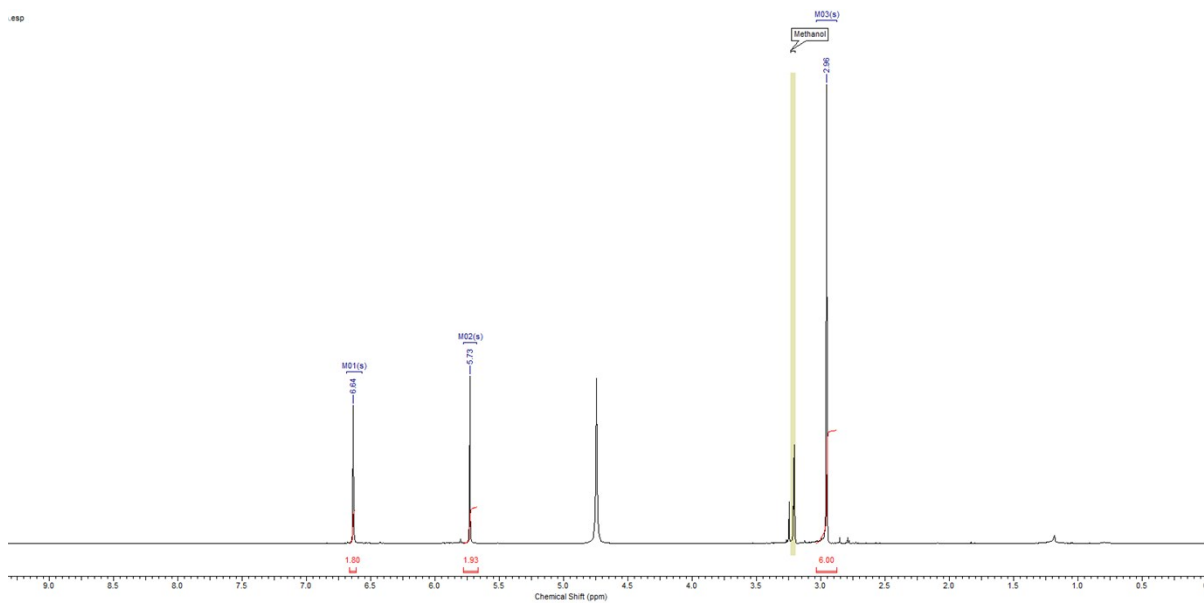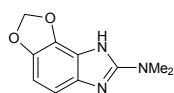

*N,N*-dimethyl-8*H*-[1,3]dioxolo[4',5':3,4]benzo[1,2-*d*]imidazol-7-amine (**20**)

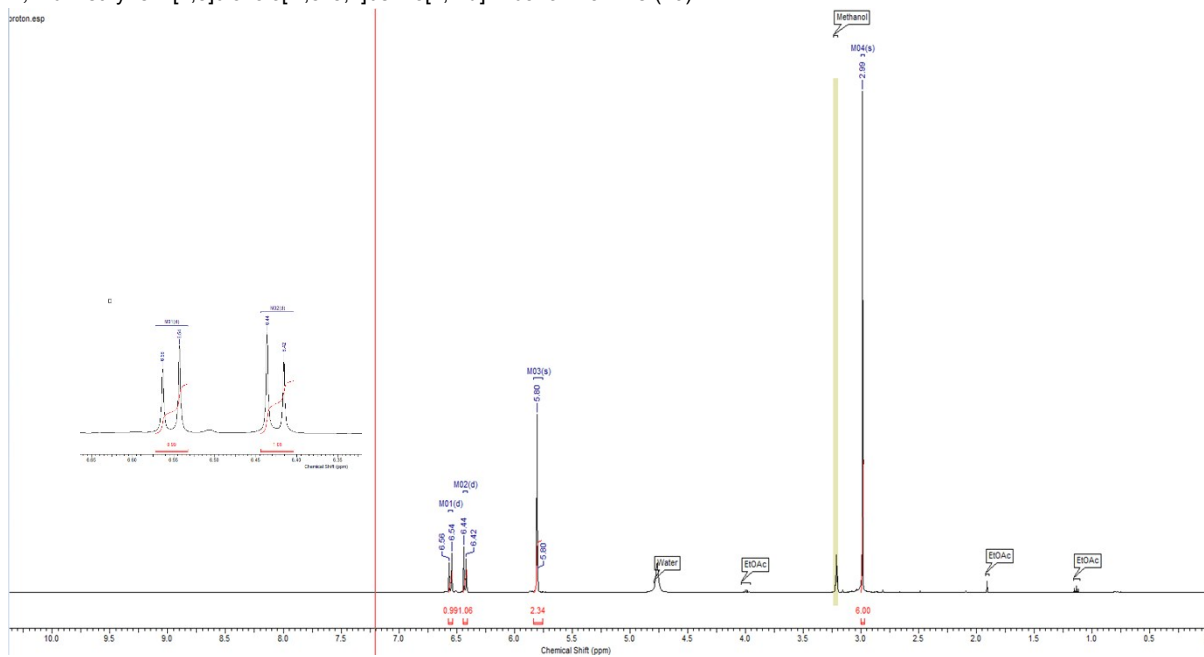





6-Bromo-N,N-diethyl-1H-benzo[d]imidazol-2-amine (22)

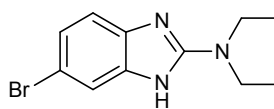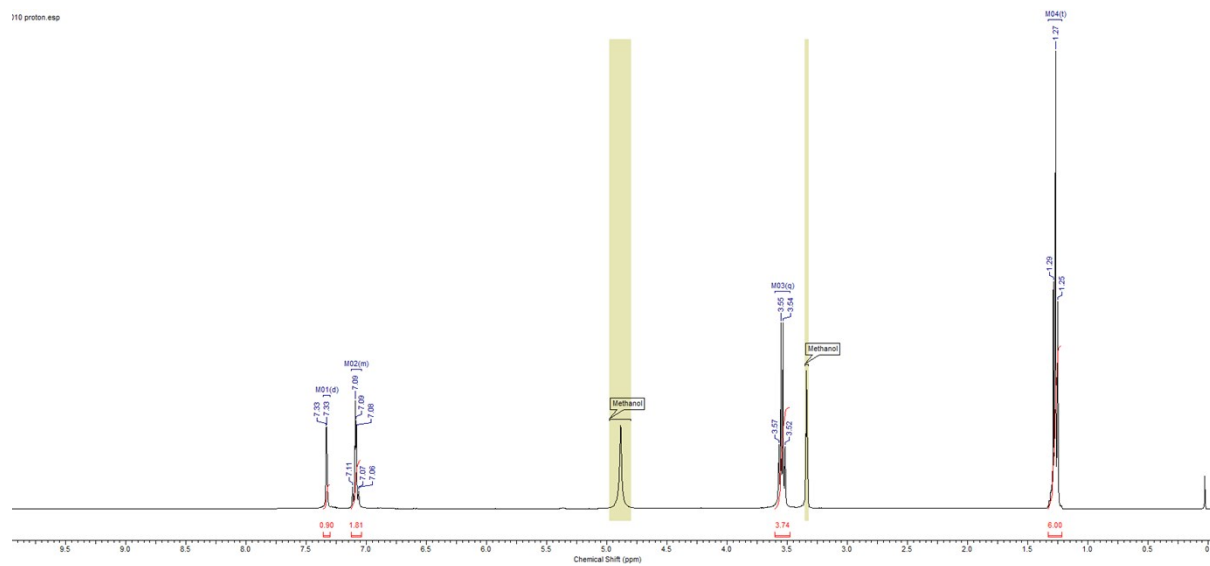

4-(6-bromo-1H-benzo[d]imidazol-2-yl)morpholine (25)

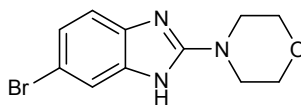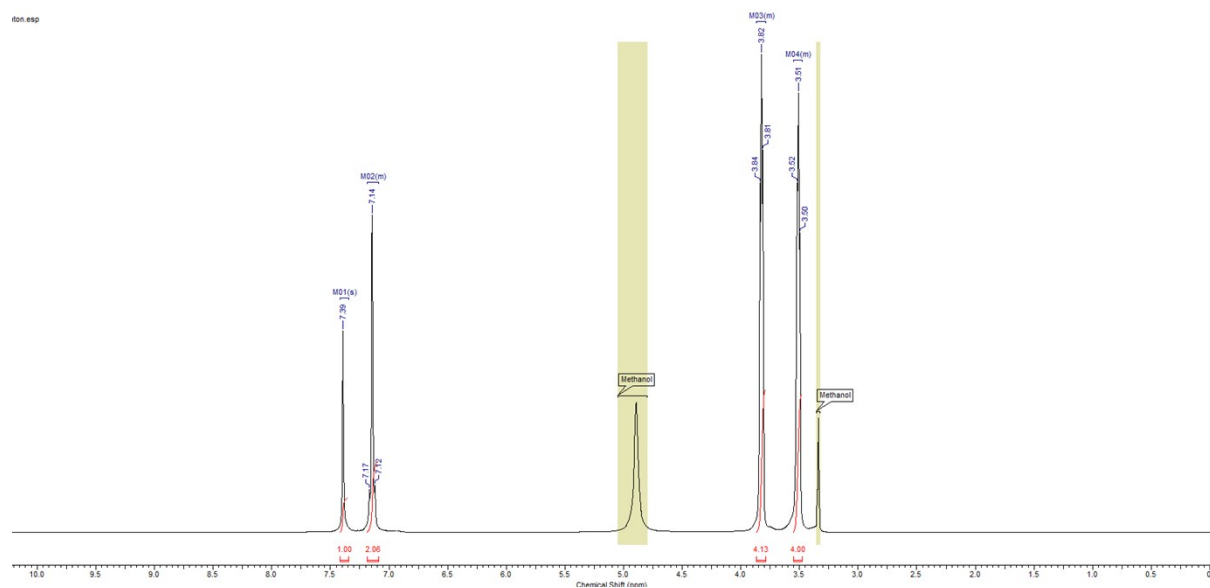

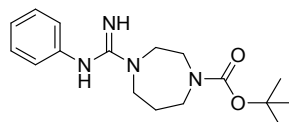

Tert-butyl 4-(*N'*-phenylcarbamimidoyl)-1,4-diazepane-1-carboxylate (**46**)

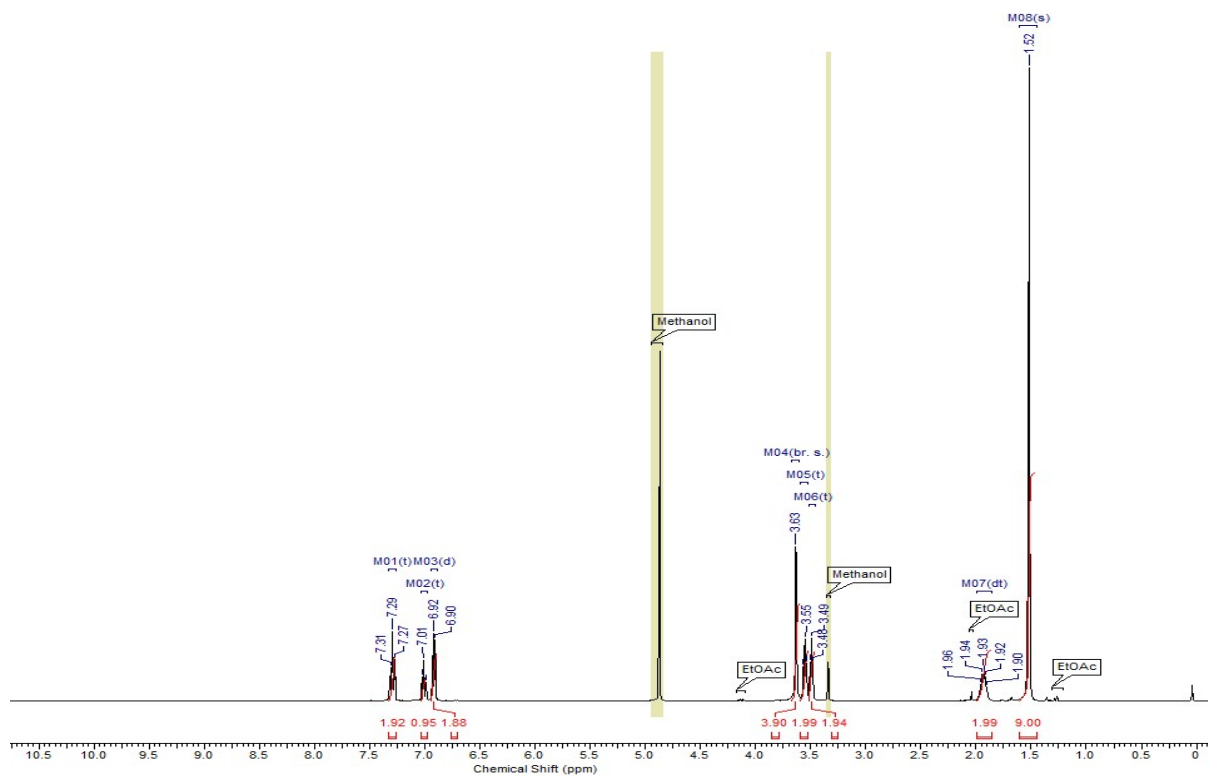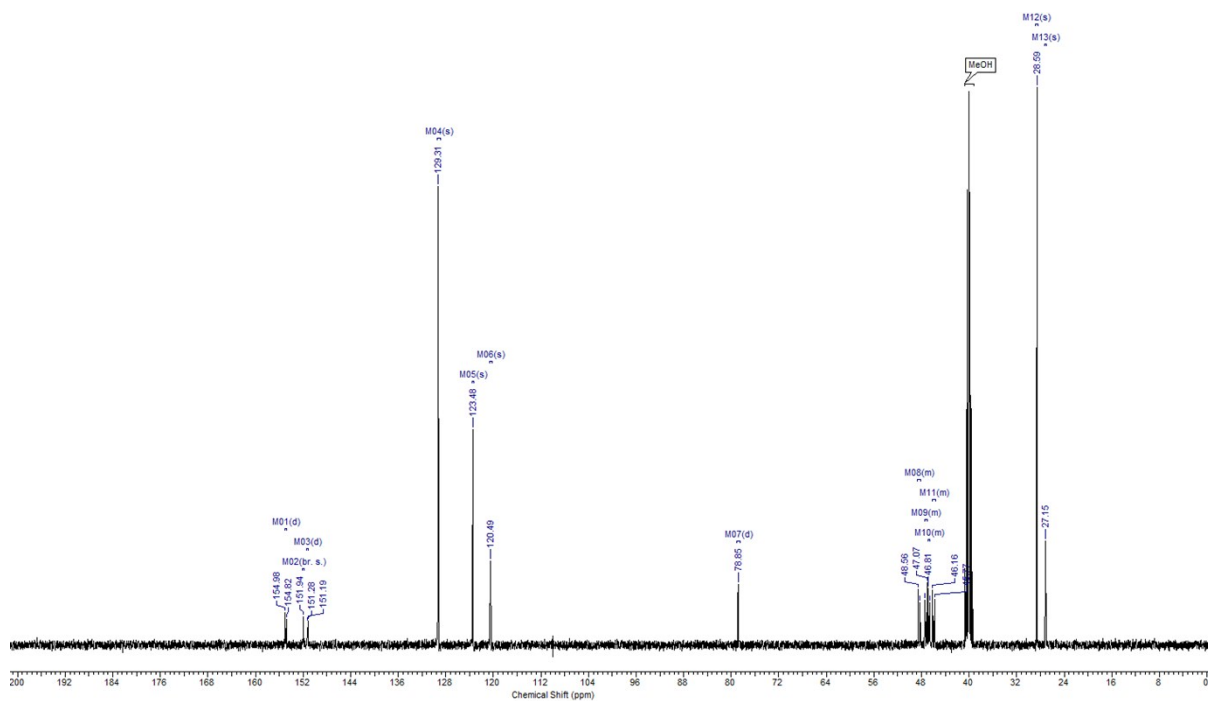



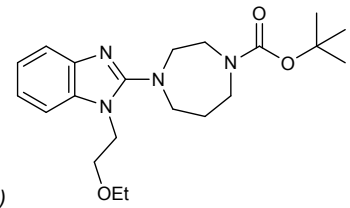

Tert-butyl 4-(1-(2-ethoxyethyl)-1H-benzo[d]imidazol-2-yl)-1,4-diazepane-1-carboxylate (**49**)

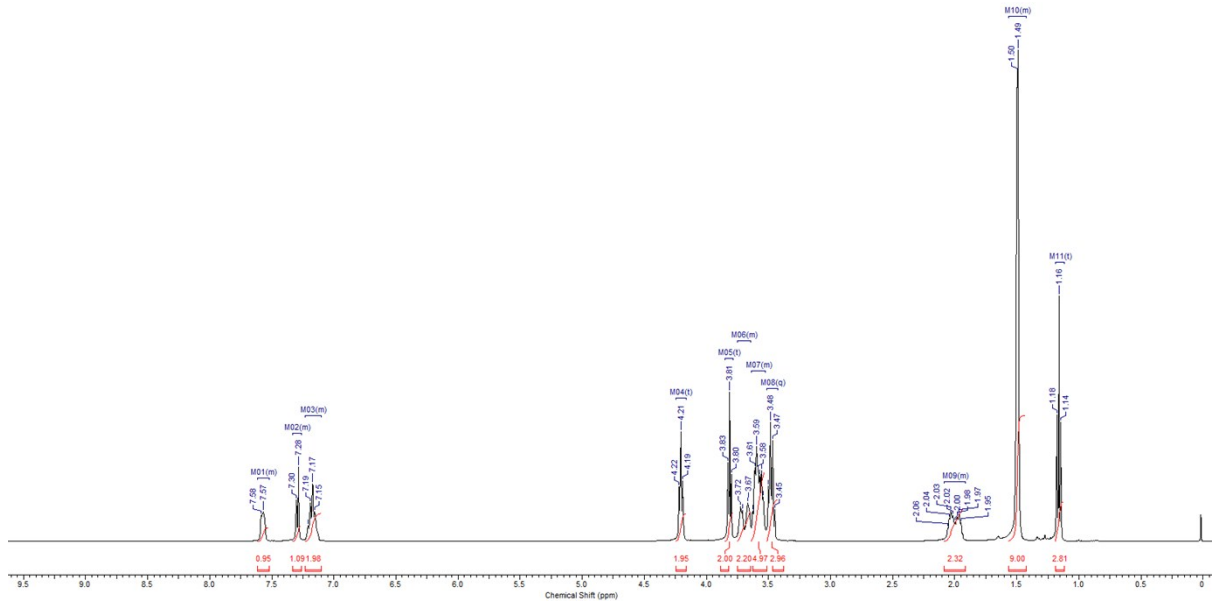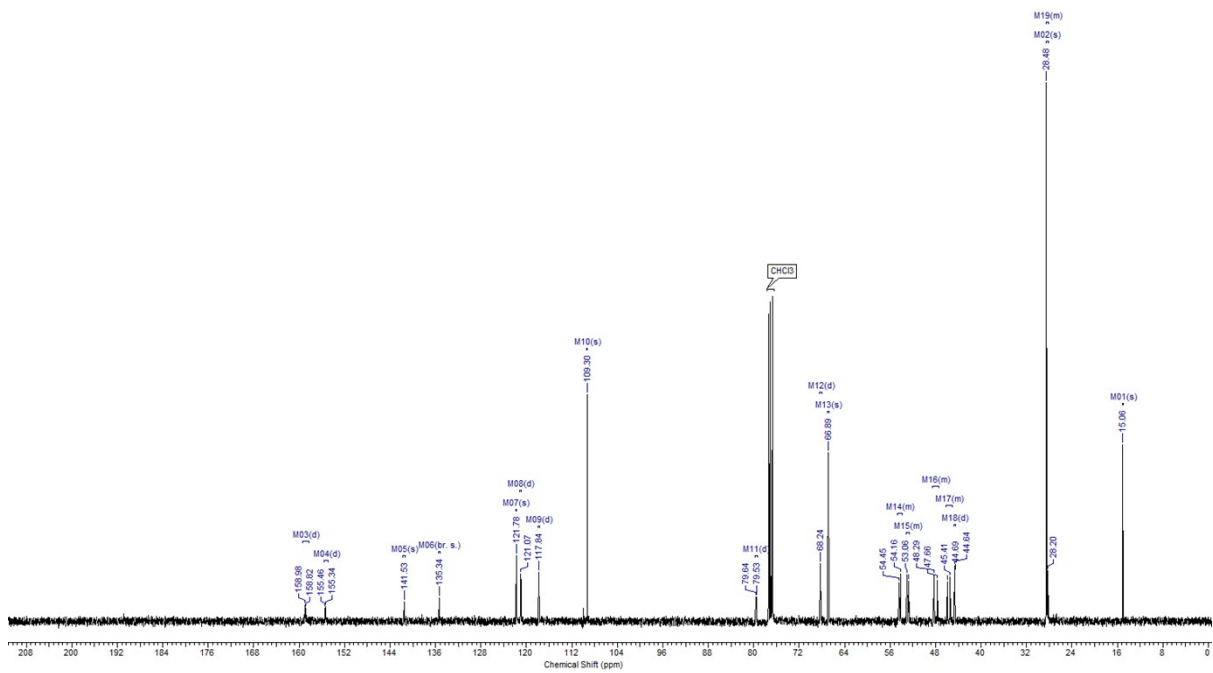

## Compound 6 elucidation

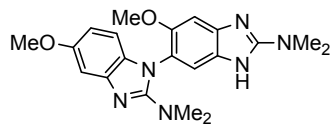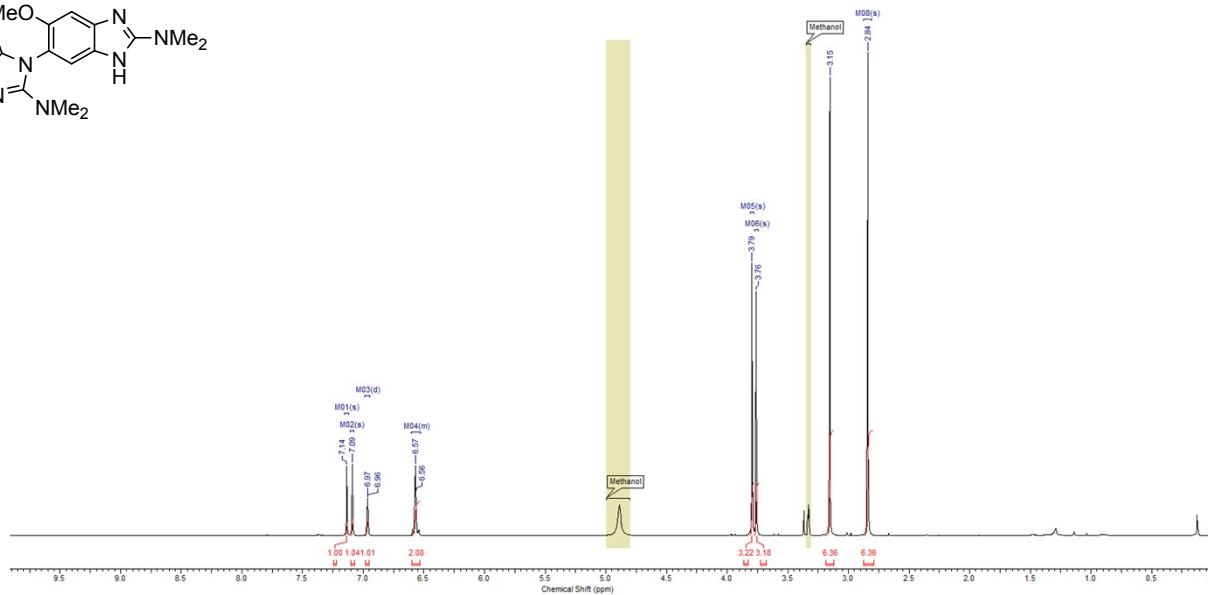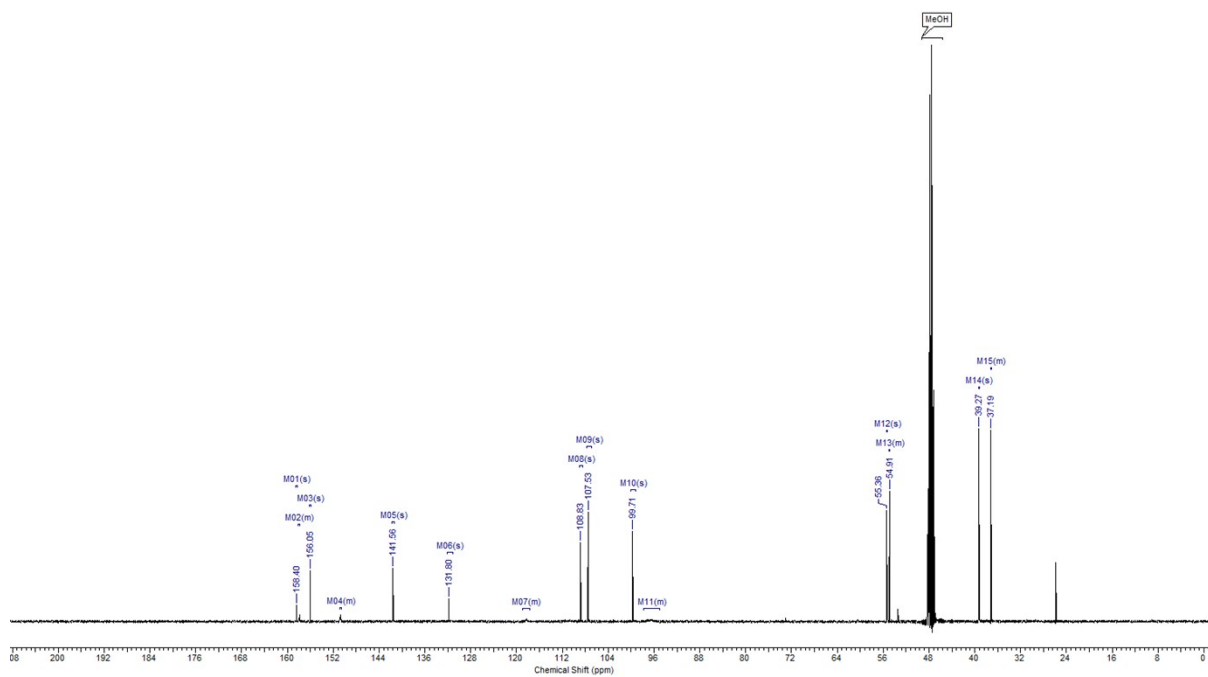

### COSY NMR

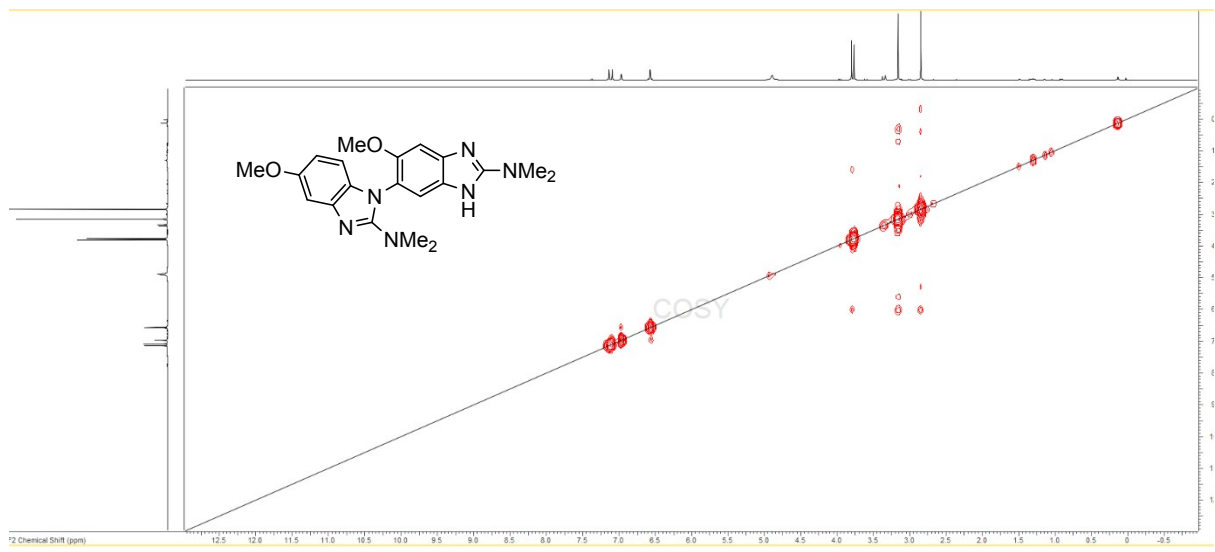

### ROESY NMR

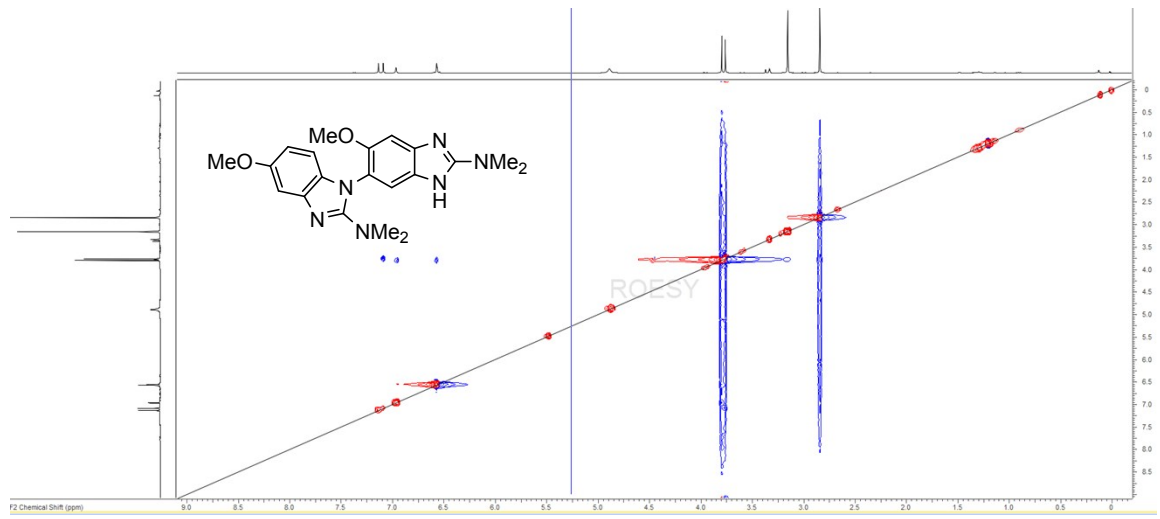

### ROSEY NMR (zoomed)

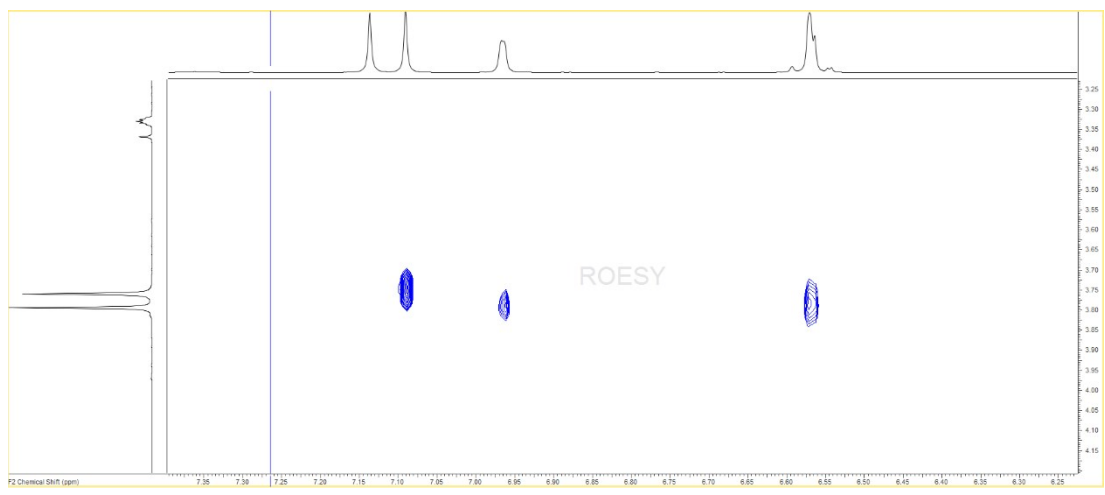



## HMBC NMR

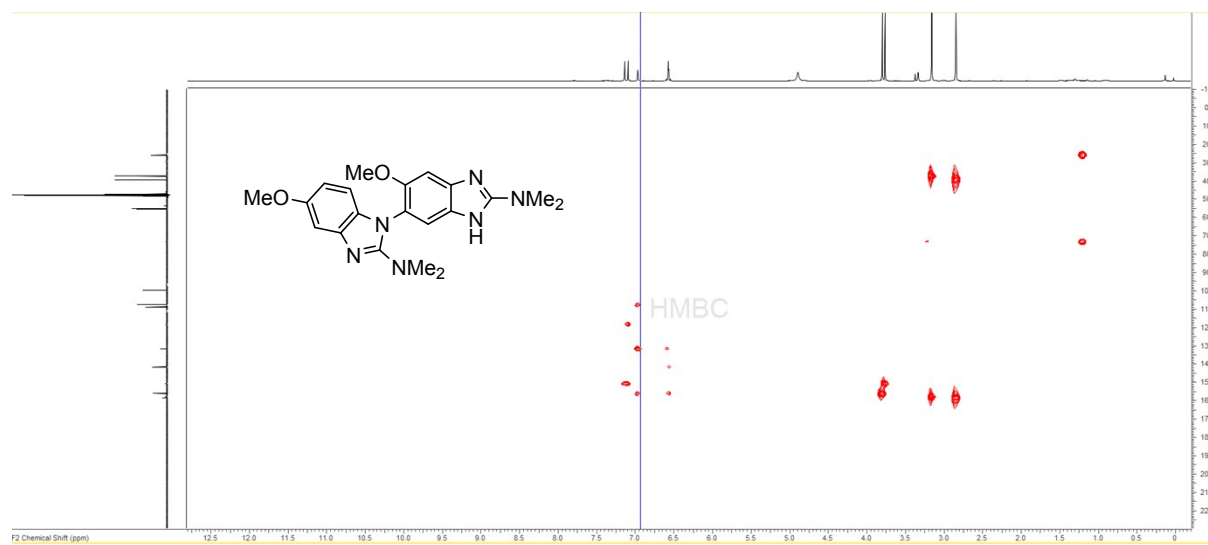

## HSQC

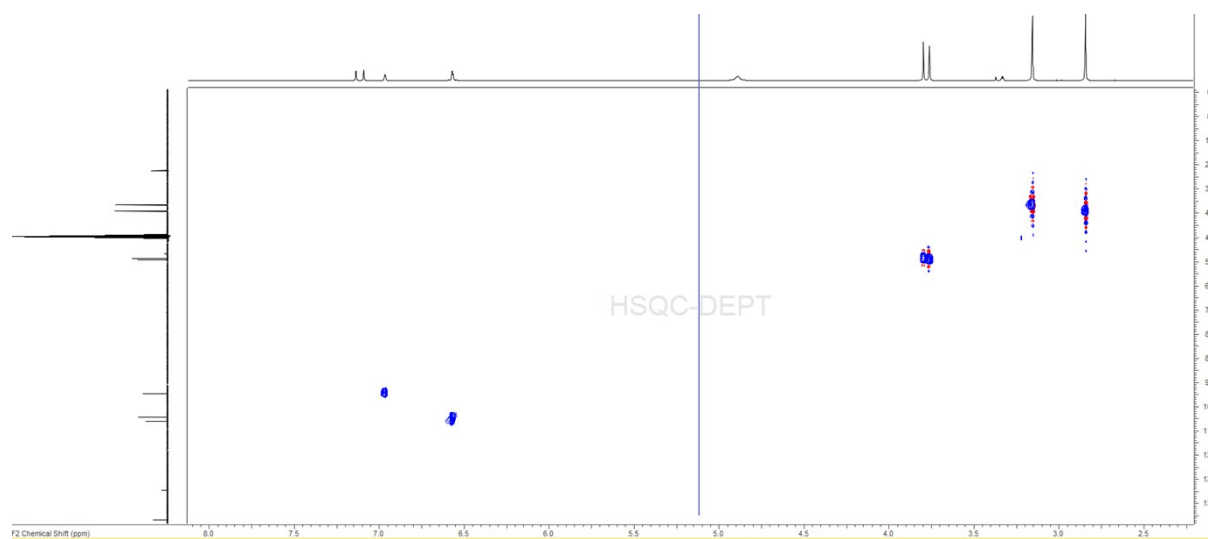

## Interpretation of NMRs

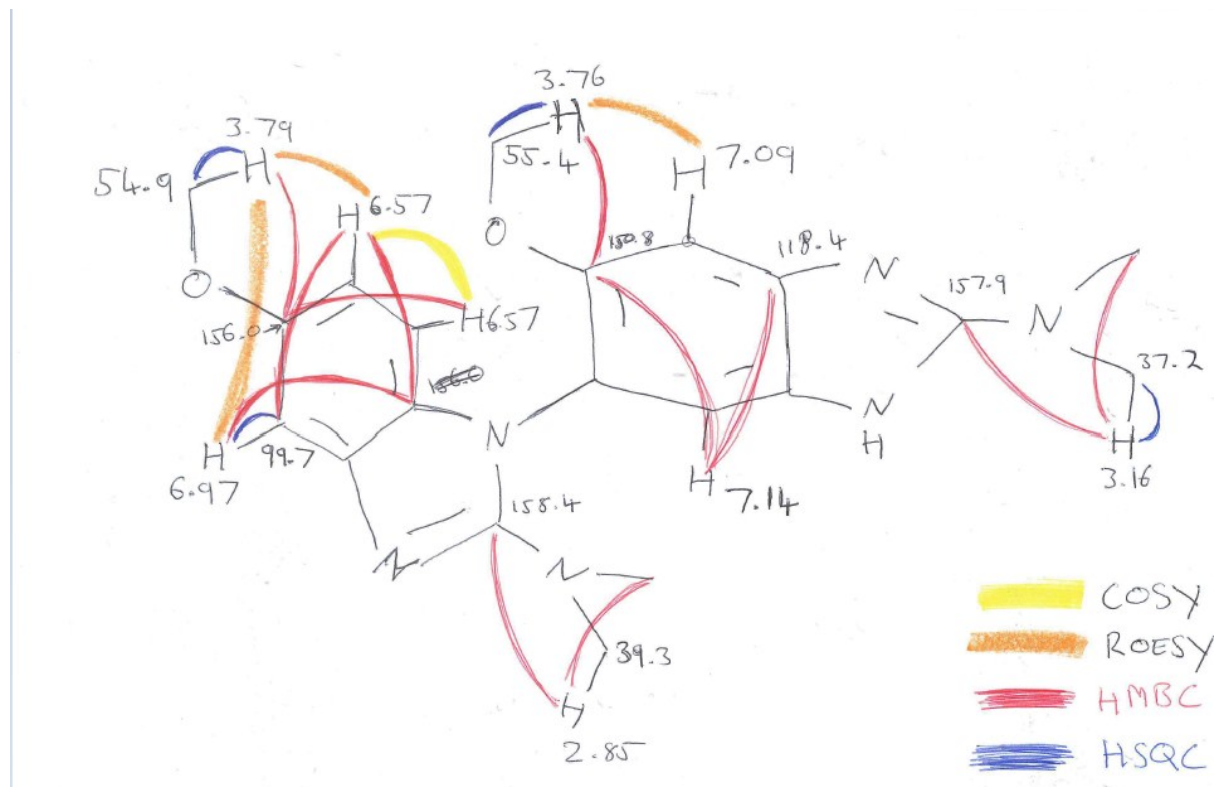

- (1) Gross, M.; Held, P.; Schubert, H. *Journal für Praktische Chemie* **1974**, 316, 434.
